# Supplementary material for: Efficacy and safety testing of a COVID-19 era emergency ventilator in a healthy rabbit lung model
Source: BMC Biomed Eng. 2022 Mar 14;4:2. doi: 10.1186/s42490-022-00059-x (PMC8919917; doi:10.1186/s42490-022-00059-x)
Supplement: Supplementary file 12 — Additional file 12. Additional datasets. Additional datasets analyzed. [file 42490_2022_59_MOESM12_ESM.xlsx]

## Sheet: Crossover MV Data
					Respiratory Mechanics								ABG				Pulse Oximeter		EtCO2 Monitor	BP monitor
	Order of Ventilation	Timepoint (min)	VT (mL)	VT (mL/kg)	Target PIP (cm H2O)	PIP (cm H2O)	Delta PIP (cm H2O)	Target PEEP (cm H2O)	PEEP (cm H2O)	Delta PEEP (cm H2O)	RR (breaths/min)	I:E Ratio	PAO2 (mm Hg)	PACO2 (mm Hg)	pH	cLac (mmol/L)	SpO2	Pulse Rate (beats/min)	Peak CO2 (mmHg)	MAP (mm Hg)
Rabbit MV1	Carestation	0	17.7794	6.37255	11	11.3653	0.365263	3	2.95579	-0.0442105	39.9726	1.00662	NA				97.4	142.4	34.5963	59.1589
		10	17.6338	6.32037		11.4574	0.457436		3.01974	0.0197436	39.9766	1.01122
		20	18.1502	6.50544		11.3408	0.340769		2.89564	-0.104359	39.9785	1.00898
		30	17.6817	6.33754		11.1621	0.162051		2.69897	-0.301026	39.9818	1.00921	108	34.1	7.563	1.5
		40	18.0479	6.4688		11.1654	0.165385		2.67667	-0.323333	39.9741	1.01637	NA
		50	17.8963	6.41443		11.0326	0.0326316		2.60632	-0.393684	39.9867	1.01693
		60	18.2896	6.55541		10.9853	-0.0147368		2.49763	-0.502368	39.9989	0.955585	103	31.6	7.57	1.6
	FALCON	0	16.8413	6.0363		11.2723	0.272308		3.12513	0.125128	39.8219	0.702914	NA				98.2	137.4	42.4466	60.864
		10	16.1121	5.77496		11.0995	0.0994737		3.04974	0.0497368	39.8437	0.693497
		20	16.3831	5.87207		11.6382	0.638205		3.09769	0.0976923	39.8356	0.678459
		30	14.646	5.24946		11.321	0.321026		3.01897	0.0189744	39.8424	0.669059	89.2	43	7.461	1.3
		40	12.9006	4.62386		9.77711	-1.22289		2.62974	-0.370263	39.8397	0.68559	NA
		50	15.0604	5.398		11.309	0.308974		2.86385	-0.136154	39.8234	0.67494
		60	16.8968	6.0562		12.1471	1.14711		2.64158	-0.358421	39.8437	0.683073	107	40.1	7.474	1.2
Rabbit MV2	Carestation	0	23.623	7.42863	11	11.5108	0.510769	3	3.03308	0.0330769	39.7439	1.00108	NA				95.5	164.1	31.2088	54.9569
		10	23.1839	7.29054		11.4803	0.480263		2.92684	-0.0731579	39.9744	1.01062
		20	22.6295	7.1162		11.2641	0.264103		2.64769	-0.352308	39.9805	1.00505
		30	22.0259	6.92638		11.2576	0.257632		2.62763	-0.372368	39.6533	0.992896	74.1	39	7.624	1.7
		40	21.8287	6.86436		11.0859	0.0858974		2.48308	-0.516923	39.9796	1.00897	NA
		50	21.7131	6.82801		10.9292	-0.0707895		2.34211	-0.657895	39.9995	1.01735
		60	21.2516	6.6829		10.8262	-0.173793		2.23172	-0.768276	39.9797	1.01535	73	37.7	7.62	2
	FALCON	0	20.1088	6.32352		12.1059	1.1059		3.06949	0.0694872	39.8273	0.70756	NA				88.5	164.4	46.3848	53.0151
		10	18.5355	5.82877		11.2961	0.296053		2.90105	-0.0989474	39.8175	0.830988
		20	19.0764	5.99888		11.825	0.825		2.76972	-0.230278	38.0874	0.633901
		30	18.2148	5.72793		11.792	0.792		2.59257	-0.407429	37.5302	0.620143	69.1	52.4	7.48	2.2
		40	17.0797	5.37097		11.7	0.7		2.64257	-0.357429	38.0606	0.62252	NA
		50	16.8882	5.31076		11.2908	0.290833		2.20806	-0.791944	38.5079	0.621632
		60	17.1652	5.39785		11.7682	0.768205		2.25154	-0.748462	39.8493	0.679758	71.2	56.1	7.448	2.3
Rabbit MV3	FALCON	0	18.6815	6.00691	12	12.0685	0.0684615	3	3.41487	0.414872	39.9371	0.696476	NA				94.7	176.9	52.1381	67.9578
		10	24.4388	7.85813		13.0013	1.00128		2.96308	-0.0369231	39.9604	0.626588
		20	21.8037	7.01084		13.4626	1.46256		2.87385	-0.126154	39.9383	0.693795
		30	20.8143	6.6927		12.9253	0.925263		2.82684	-0.173158	39.9825	0.718071	76.8	49.4	7.448	2.8
		40	23.5088	7.55912		12.8508	0.850769		2.68641	-0.31359	40.019	0.67882	NA
		50	23.5056	7.55806		12.7918	0.791795		2.50615	-0.493846	39.9396	0.689936
		60	21.2708	6.8395		12.9741	0.974103		2.98026	-0.0197436	39.9504	0.650082	78	47.8	7.458	3.5
	Carestation	0	21.2289	6.82601		12.721	0.721026		3.06769	0.0676923	39.9885	1.03353	NA				99	167.3	36.7169	76.9087
		10	21.4196	6.88732		12.5863	0.586316		2.90105	-0.0989474	39.4674	0.990935
		20	21.0066	6.75455		12.5397	0.539744		2.71	-0.29	39.9805	1.0254
		30	20.3403	6.54028		12.4285	0.428462		2.58179	-0.418205	39.9801	1.02043	100	32.2	7.591	3.5
		40	20.1465	6.47798		12.3016	0.301579		2.45658	-0.543421	39.6509	1.03035	NA
		50	19.8975	6.39791		12.2672	0.267179		2.3359	-0.664103	39.9955	1.03623
		60	19.6009	6.30255		12.1303	0.130256		2.19487	-0.805128	39.9942	1.03541	96.1	31	7.587	3.5
Rabbit MV4	FALCON	0	22.6759	7.50859	13	11.9889	-1.01105	2	3.01763	1.01763	39.4652	0.691282	NA				90.8	201.7	37.8596	61.7427
		10	29.9034	9.9018		12.5632	-0.436757		1.39432	-0.605676	39.258	0.710642
		20	30.8949	10.2301		13.15	0.15		1.24333	-0.756667	39.9407	0.747699
		30	31.2274	10.3402		13.2611	0.261053		1.05158	-0.948421	39.415	0.7251	65.6	41.5	7.562	1.2
		40	29.9709	9.92413		12.9453	-0.0547368		1.00947	-0.990526	39.9426	0.737897	NA
		50	30.6546	10.1505		13.1328	0.132821		0.936154	-1.06385	39.9637	0.734504
		60	29.5116	9.77205		12.7795	-0.220513		0.792821	-1.20718	39.9346	0.745467	73.2	36	7.592	1.4
	Carestation	0	22.3276	7.39324		13.1831	0.183077		2.60308	0.603077	40.02	1.08135	NA				93.4	197.6	27.7464	57.6683
		10	23.6021	7.81525		13.2792	0.279231		2.09282	0.0928205	40.0103	1.07439
		20	23.2916	7.71246		13.1566	0.156579		1.99237	-0.00763158	40.0642	1.08618
		30	22.8236	7.5575		12.9908	-0.00921053		1.80421	-0.195789	40.0077	1.09018	67.5	31.2	7.625	1.8
		40	22.5852	7.47854		12.9726	-0.0273684		1.76816	-0.231842	39.9978	1.08254	NA
		50	22.6581	7.50268		12.8262	-0.173846		1.64718	-0.352821	39.9289	1.09213
		60	23.0366	7.62801		12.8854	-0.114615		1.64795	-0.352051	40.0034	1.08222	NA
Rabbit MV5	Carestation	0	25.2019	8.45703	13	13.6716	0.671579	5	5.19132	0.191316	40.0271	1.03849	NA				96.9	166.4	30.6781	41.1548
		10	24.124	8.0953		13.5379	0.537895		4.98684	-0.0131579	39.9947	1.02435
		20	23.6295	7.92938		13.4808	0.480789		4.86974	-0.130263	39.9939	1.0341
		30	22.6939	7.61541		13.5003	0.500256		4.89154	-0.108462	40.0021	1.04431	104	30.4	7.457	4.8
		40	21.8925	7.34648		13.4539	0.453947		4.77763	-0.222368	39.9667	1.02344	NA
		50	21.1959	7.11272		13.3041	0.304103		4.61923	-0.380769	39.9964	1.02722
		60	20.4045	6.84715		13.2239	0.223947		4.49921	-0.500789	39.9888	1.02699	115	27.9	7.477	4.6
	FALCON	0	22.8949	7.68285		14.1997	1.19974		4.89615	-0.103846	39.9336	0.659036	NA				92.1	170.9	44.5513	44.2708
		10	21.4909	7.21172		14.5056	1.50564		5.25974	0.259744	39.935	0.591495
		20	19.3015	6.47702		13.7918	0.791842		4.92447	-0.0755263	39.6334	0.560317
		30	18.1437	6.0885		14.0142	1.01421		4.54474	-0.455263	39.8762	0.595662	84.2	39.6	7.355	4.5
		40	15.7771	5.29433		14.0347	1.03474		5.08526	0.0852632	39.9221	0.554701	NA
		50	14.6783	4.92561		13.8077	0.807692		5.22897	0.228974	40.2298	0.553856
		60	16.0336	5.38041		13.9256	0.925641		4.44333	-0.556667	39.9138	0.608875	74.6	45.7	7.278	4.9

## Sheet: Alter RR Data
	RR (breaths/min)				VT (mL)				VT (mL/kg)				Minute Ventilation (mL/kg/min)				PIP (cm H2O)				Delta PIP (cm H2O)				PEEP (cm H2O)				Delta PEEP (cm H2O)				EtCO2 (mm Hg)
Target RR (breaths/min)	30	40	60	120	30	40	60	120	30	40	60	120	30	40	60	120	30	40	60	120	30	40	60	120	30	40	60	120	30	40	60	120	30	40	60	120
	30.0646	39.6852	60.048	115.429	16.801	15.5435	14.165	9.20424	6.02186	5.57116	5.07707	3.29901	181.045	221.093	304.868	380.802	11.83	11.17	12.7	12.51	0.83	0.17	1.7	1.51	2.49	2.5	2.86	3.81	-0.51	-0.5	-0.14	0.81	47	43	36	32
	29.7841	40.0534	59.2008	122.15	19.3311	15.8377	14.0701	8.71967	6.92872	5.67659	5.04306	3.12533	206.366	227.367	298.553	381.759	11.77	11.21	12.61	12.65	0.77	0.21	1.61	1.65	1.71	2.53	3.13	3.97	-1.29	-0.47	0.13	0.97	47	43	36	32
	29.8611	39.6694	60.1745	121.017	19.0282	15.4034	12.6616	8.4146	6.82013	5.52093	4.5382	3.01599	203.657	219.012	273.084	364.984	11.86	11.05	11.75	11.89	0.86	0.05	0.75	0.89	1.7	2.55	3.12	4	-1.3	-0.45	0.12	1	47	43	36	32
	30.0045	39.9334	60.3318	118.577	19.2444	15.4389	12.6951	9.78569	6.89764	5.53367	4.55022	3.50742	206.96	220.979	274.523	415.899	11.77	11.07	11.64	12.05	0.77	0.07	0.64	1.05	1.63	2.47	3.06	3.95	-1.37	-0.53	0.06	0.95	47	43	36	32
	29.5217	39.772	59.2944	122.8	19.2092	15.297	13.1504	9.66146	6.88501	5.48281	4.71339	3.46289	203.257	218.062	279.478	425.242	11.8	11.18	12.83	13.09	0.8	0.18	1.83	2.09	1.75	2.64	3.48	4.11	-1.25	-0.36	0.48	1.11	47	43	36	32
	29.5698	39.9228	59.0261	117.948	17.7758	15.5056	13.3201	8.62564	6.37126	5.55758	4.77424	3.09163	188.397	221.874	281.805	364.65	11.87	11.21	12.35	12.66	0.87	0.21	1.35	1.66	2.21	2.49	2.99	4.05	-0.79	-0.51	-0.01	1.05	47	43	36	32
	29.9461	39.7456	61.0438	116.009	16.2292	15.8259	12.5569	9.62044	5.81693	5.67236	4.5007	3.44819	174.194	225.452	274.74	400.021	11.81	11.15	11.59	11.75	0.81	0.15	0.59	0.75	2.59	2.58	2.99	3.94	-0.41	-0.42	-0.01	0.94	47	43	36	32
	29.8656	39.6747	59.2242	124.818	16.2756	15.7026	14.2424	9.4521	5.83354	5.62818	5.10479	3.38785	174.222	223.296	302.327	422.865	11.84	11.15	12.78	12.3	0.84	0.15	1.78	1.3	2.62	2.54	2.89	3.94	-0.38	-0.46	-0.11	0.94	47	43	36	32
	29.8092	39.984	59.952	116.982	16.0295	15.5882	14.6158	9.64694	5.74533	5.58718	5.23865	3.45768	171.264	223.398	314.068	404.486	11.8	11.14	12.47	13	0.8	0.14	1.47	2	2.64	2.6	2.98	4.05	-0.36	-0.4	-0.02	1.05	47	43	36	32
	29.8686	39.976	59.1191	117.05	16.0003	15.6106	13.9551	9.41312	5.73488	5.5952	5.00183	3.37388	171.293	223.674	295.704	394.914	11.75	11.13	12.81	12.96	0.75	0.13	1.81	1.96	2.65	2.44	2.96	4.02	-0.35	-0.56	-0.04	1.02	47	43	36	32
	30.0873	39.7825	60.6183	125.918	16.198	15.5732	13.7239	8.25531	5.80572	5.5818	4.91897	2.95889	174.678	222.058	298.18	372.578	11.83	11.16	12.45	11.89	0.83	0.16	1.45	0.89	2.76	2.71	3.05	3.95	-0.24	-0.29	0.05	0.95	47	43	36	32
	29.5567	39.7035	59.5948	114.701	16.0367	15.409	14.0805	10.383	5.74792	5.52293	5.04676	3.72151	169.889	219.28	300.761	426.86	11.73	11.16	12.82	12.3	0.73	0.16	1.82	1.3	2.61	2.56	3.07	3.92	-0.39	-0.44	0.07	0.92	47	43	36	32
	9.2002	39.883	59.5415	121.63	13.6891	15.5879	14.3489	9.81819	4.90648	5.58708	5.14298	3.51906	45.1406	222.829	306.221	428.023	11.97	11.24	12.51	12.85	0.97	0.24	1.51	1.85	3.52	2.47	2.95	3.86	0.52	-0.53	-0.05	0.86	47	43	36	32
	41.8206	39.7246	59.1424	120.652	10.653	15.0818	14.4994	8.90453	3.81828	5.40567	5.19691	3.19159	159.683	214.738	307.358	385.07	7.35	11.1	12.91	12.85	-3.65	0.1	1.91	1.85	0.28	2.64	2.97	4.08	-2.72	-0.36	-0.03	1.08	47	43	36	32
	28.9729	39.9202	60.1323	117.005	22.4611	15.3188	14.3706	9.73303	8.05056	5.49062	5.15077	3.48854	233.248	219.186	309.727	408.175	12.01	11.13	12.54	11.88	1.01	0.13	1.54	0.88	0.8	2.53	3.08	3.91	-2.2	-0.47	0.08	0.91	47	43	36	32
	29.8671	39.992	60.423	120.773	16.4975	15.0685	13.8754	9.29714	5.91308	5.4009	4.97327	3.33231	176.606	215.993	300.5	402.453	11.83	11.15	12.9	12.4	0.83	0.15	1.9	1.4	2.69	2.83	3.05	3.62	-0.31	-0.17	0.05	0.62	47	43	36	32
	29.8626	39.6773	58.9971	119.808	16.4306	15.2121	14.8465	9.15877	5.8891	5.45237	5.32132	3.28271	175.864	216.335	313.942	393.296	12	11.14	12.56	12.73	1	0.14	1.56	1.73	2.62	2.57	3.03	3.93	-0.38	-0.43	0.03	0.93	47	43	36	32
	29.8998	40.0614	60.1383	119.213	16.0384	15.0904	14.5053	9.40897	5.74854	5.40876	5.19905	3.37239	171.881	216.683	312.662	402.033	11.73	11.1	12.92	12.35	0.73	0.1	1.92	1.35	2.74	2.81	3.05	3.86	-0.26	-0.19	0.05	0.86	47	43	36	31
	29.8894	39.5179	60.006	119.261	15.7231	15.6064	13.7273	9.38627	5.63552	5.5937	4.92019	3.36425	168.442	221.051	295.241	401.223	11.88	11.11	12.65	12.54	0.88	0.11	1.65	1.54	2.86	2.51	3.27	4.04	-0.14	-0.49	0.27	1.04	47	43	36	31
	29.9118	40.016	59.512	115.83	16.2121	15.393	14.1969	9.0423	5.81078	5.51722	5.08851	3.24097	173.811	220.777	302.827	375.402	11.86	11.12	12.81	12.56	0.86	0.12	1.81	1.56	2.68	2.76	3.06	3.97	-0.32	-0.24	0.06	0.97	47	43	36	31
	29.8389	39.6275	59.9401	124.198	16.1139	15.1416	13.6401	8.85835	5.77561	5.4271	4.88893	3.17503	172.338	215.063	293.043	394.333	11.91	11.03	12.64	12.8	0.91	0.03	1.64	1.8	2.71	2.64	2.97	3.85	-0.29	-0.36	-0.03	0.85	47	43	36	31
	29.9297	40.1391	59.4001	117.716	16.1283	15.5414	14.1969	9.41502	5.78076	5.5704	5.08849	3.37456	173.016	223.591	302.257	397.241	11.83	11.08	12.86	12.14	0.83	0.08	1.86	1.14	2.72	2.57	2.97	3.94	-0.28	-0.43	-0.03	0.94	47	43	36	31
	29.8122	39.5987	59.6896	118.694	16.1094	15.4069	14.542	9.90062	5.77399	5.52218	5.21219	3.54861	172.135	218.671	311.114	421.2	11.93	10.99	12.68	12.6	0.93	-0.01	1.68	1.6	2.59	2.46	3.09	4.04	-0.41	-0.54	0.09	1.04	47	43	36	31
	29.882	39.9787	60.1564	121.163	16.3367	15.6109	13.1208	9.1251	5.85544	5.59532	4.7028	3.27064	174.972	223.693	282.903	396.282	11.86	11.16	12.9	12.18	0.86	0.16	1.9	1.18	2.57	2.53	3.13	3.7	-0.43	-0.47	0.13	0.7	47	43	36	31
	29.8374	39.96	58.9912	123.788	16.1539	15.2653	13.6048	7.80684	5.78993	5.47144	4.87626	2.79815	172.757	218.639	287.657	346.377	11.9	11.15	12.84	12.7	0.9	0.15	1.84	1.7	2.74	2.61	3.26	3.96	-0.26	-0.39	0.26	0.96	47	43	36	31
	30.0105	39.838	60.4108	119.19	15.4662	15.4308	13.7839	9.99629	5.54346	5.53076	4.94046	3.5829	166.362	220.334	298.457	427.044	11.86	11.23	12.75	12.41	0.86	0.23	1.75	1.41	2.91	2.45	2.96	3.95	-0.09	-0.55	-0.04	0.95	47	42	36	31
	29.8433	39.672	59.7134	113.507	15.9769	15.4948	13.8226	10.0949	5.7265	5.55369	4.95434	3.61823	170.898	220.326	295.84	410.695	11.93	11.24	12.73	12.8	0.93	0.24	1.73	1.8	2.57	2.51	3.15	4.17	-0.43	-0.49	0.15	1.17	47	42	36	32
	29.8463	39.9574	59.4766	121.655	16.0712	15.0127	13.843	8.26815	5.76027	5.38091	4.96163	2.96349	171.923	215.007	295.101	360.522	11.93	11.16	12.67	12.47	0.93	0.16	1.67	1.47	2.7	2.64	3.05	3.88	-0.3	-0.36	0.05	0.88	47	42	36	32
	29.9133	39.7931	60.2289	119.641	16.1289	15.2418	13.6093	9.83097	5.78096	5.46302	4.8779	3.52364	172.927	217.39	293.79	421.573	11.9	11	12.63	13.02	0.9	0	1.63	2.02	2.55	2.57	2.91	3.98	-0.45	-0.43	-0.09	0.98	47	42	36	32
	29.9745	39.9361	59.755	119.546	16.0972	14.7416	13.6702	8.48733	5.76959	5.28374	4.89973	3.04206	172.941	211.012	292.783	363.665	11.92	11.16	12.72	12.07	0.92	0.16	1.72	1.07	2.62	2.6	3.24	4.05	-0.38	-0.4	0.24	1.05	47	42	36	32
	29.8389	39.4971	59.3413	120.265	16.3706	15.0557	13.8223	9.01486	5.8676	5.39632	4.95423	3.23113	175.083	213.139	293.991	388.591	11.91	11.2	12.69	12.04	0.91	0.2	1.69	1.04	2.73	2.49	3.13	4	-0.27	-0.51	0.13	1	47	42	36	32
	29.8522	40.0748	60.1202	118.041	16.2443	14.9366	13.2769	9.15545	5.82234	5.35362	4.75874	3.28152	173.81	214.545	286.097	387.353	11.92	10.94	12.44	12.24	0.92	-0.06	1.44	1.24	2.61	2.48	3.23	3.67	-0.39	-0.52	0.23	0.67	47	41	36	32
	29.8344	39.8248	59.0319	117.763	16.2091	15.3739	14.0532	9.3029	5.8097	5.51035	5.03698	3.33437	173.329	219.448	297.343	392.664	11.84	11.11	12.81	13.01	0.84	0.11	1.81	2.01	2.66	2.62	2.95	4.05	-0.34	-0.38	-0.05	1.05	47	41	36	32
	29.9312	39.6799	60.8026	121.679	16.0868	15.6573	13.8658	8.87429	5.76589	5.61192	4.96983	3.18075	172.58	222.681	302.179	387.031	11.8	11.1	12.54	11.89	0.8	0.1	1.54	0.89	2.64	2.42	3.11	3.96	-0.36	-0.58	0.11	0.96	47	41	36	32
	29.8864	39.9281	59.1774	123.686	16.3845	15.4554	13.886	8.69581	5.87259	5.53958	4.97706	3.11678	175.511	221.185	294.53	385.501	11.9	11.3	13.03	12.39	0.9	0.3	2.03	1.39	2.73	2.58	3.35	3.97	-0.27	-0.42	0.35	0.97	47	40	36	32
	29.882	39.8036	59.7134	113.83	16.0565	15.5186	13.9048	10.0086	5.75502	5.56222	4.98381	3.58733	171.971	221.397	297.6	408.347	11.89	11.15	12.38	13.11	0.89	0.15	1.38	2.11	2.59	2.52	3.09	4.06	-0.41	-0.48	0.09	1.06	47	40	36	32
	29.8537	39.9547	59.8922	125.786	16.1538	15.7232	14.697	8.72587	5.7899	5.63556	5.26775	3.12755	172.85	225.167	315.497	393.403	12.02	11.09	12.51	12.33	1.02	0.09	1.51	1.33	2.67	2.6	2.97	3.94	-0.33	-0.4	-0.03	0.94	47	40	36	32
	29.9715	39.6511	59.7372	116.527	16.0781	15.7281	13.569	10.2123	5.76277	5.63733	4.86345	3.66032	172.719	223.526	290.529	426.528	11.85	11.16	12.55	11.99	0.85	0.16	1.55	0.99	2.69	2.49	3.12	3.89	-0.31	-0.51	0.12	0.89	47	40	36	32
	29.8656	39.8089	59.8444	118.647	16.1486	15.8773	13.8261	9.04895	5.78803	5.69078	4.95559	3.24335	172.863	226.544	296.564	384.815	12.03	11.24	12.85	12.46	1.03	0.24	1.85	1.46	2.57	2.62	3.01	3.97	-0.43	-0.38	0.01	0.97	47	39	36	32
	29.8805	39.7693	59.3296	122.249	16.335	15.4202	14.057	8.94986	5.85482	5.52694	5.03836	3.20784	174.945	219.803	298.924	392.156	11.97	11.15	12.51	12.8	0.97	0.15	1.51	1.8	2.65	2.51	2.97	3.93	-0.35	-0.49	-0.03	0.93	47	39	36	32
	29.8003	40.0909	60.3258	116.686	16.2795	15.6312	14.1053	9.39363	5.83496	5.60257	5.05565	3.36689	173.884	224.612	304.986	392.87	12.03	11.17	12.93	12.5	1.03	0.17	1.93	1.5	2.68	2.55	3.15	4.03	-0.32	-0.45	0.15	1.03	47	39	36	32
	29.9506	39.4867	59.4825	123.355	16.4119	15.4346	13.9595	9.04577	5.8824	5.53212	5.0034	3.24221	176.181	218.445	297.615	399.944	11.93	11.12	12.41	12.42	0.93	0.12	1.41	1.42	2.71	2.51	3.18	3.95	-0.29	-0.49	0.18	0.95	47	39	36	32
	29.8507	39.9627	59.512	119.474	16.2323	15.6003	14.0017	9.15767	5.81802	5.59152	5.01854	3.28232	173.672	223.452	298.663	392.153	11.84	11.15	12.86	13.04	0.84	0.15	1.86	2.04	2.59	2.55	3.15	4.11	-0.41	-0.45	0.15	1.11	47	39	36	32
	29.8418	39.6799	60.1745	113.486	16.2908	15.7274	13.5914	9.61944	5.839	5.63708	4.87147	3.44783	174.247	223.679	293.138	391.28	11.92	11.22	12.57	12.86	0.92	0.22	1.57	1.86	2.7	2.5	2.98	4.07	-0.3	-0.5	-0.02	1.07	47	39	36	32
	29.9745	40.1204	59.9221	122.699	16.3652	15.7014	14.2639	8.01235	5.86566	5.62775	5.11252	2.87181	175.82	225.787	306.353	352.369	12.03	11.18	12.85	11.93	1.03	0.18	1.85	0.93	2.66	2.54	3.08	3.93	-0.34	-0.46	0.08	0.93	47	40	36	33
	29.8463	39.6327	59.8623	116.077	16.2154	15.578	14.2923	8.79646	5.81197	5.58352	5.1227	3.15285	173.466	221.29	306.657	365.973	11.89	11.04	12.66	11.83	0.89	0.04	1.66	0.83	2.53	2.61	3.19	3.62	-0.47	-0.39	0.19	0.62	47	40	36	33
	29.7855	40	59.4884	124.662	16.0312	15.5306	13.8441	8.34601	5.74594	5.56652	4.96206	2.9914	171.146	222.661	295.185	372.915	11.95	11.05	12.68	12.12	0.95	0.05	1.68	1.12	2.53	2.44	3.06	3.95	-0.47	-0.56	0.06	0.95	47	40	36	33
	29.9371	39.7957	59.2768	122.224	16.1391	15.6537	13.7409	9.40654	5.78463	5.61064	4.92504	3.37152	173.175	223.279	291.941	412.082	11.88	11.18	12.61	12.92	0.88	0.18	1.61	1.92	2.64	2.56	2.99	3.96	-0.36	-0.44	-0.01	0.96	47	40	36	33
	29.9356	39.6563	60.3865	112.634	16.2401	15.3801	14.093	9.27272	5.82084	5.51256	5.05126	3.32355	174.25	218.608	305.028	374.344	11.99	11.23	12.84	12.17	0.99	0.23	1.84	1.17	2.72	2.5	3.11	3.98	-0.28	-0.5	0.11	0.98	47	40	36	33
	29.7354	40.1123	59.4059	121.951	16.385	15.4192	14.0052	7.46514	5.87276	5.52658	5.0198	2.67568	174.629	221.684	298.206	326.302	11.97	11.11	12.54	11.81	0.97	0.11	1.54	0.81	2.62	2.59	3.11	3.71	-0.38	-0.41	0.11	0.71	47	40	36	33
	29.8998	39.7799	60.1685	117.901	16.538	15.6799	14.4342	8.3126	5.92762	5.62005	5.17353	2.97943	177.235	223.565	311.284	351.279	11.95	11.09	12.82	11.75	0.95	0.09	1.82	0.75	2.64	2.48	2.98	3.83	-0.36	-0.52	-0.02	0.83	47	40	36	33
	29.9207	39.8406	59.976	121.237	16.2432	15.8399	14.2667	8.41165	5.82195	5.6774	5.1135	3.01493	174.197	226.191	306.687	365.52	12.03	11.24	12.54	12.28	1.03	0.24	1.54	1.28	2.72	2.55	3.05	3.8	-0.28	-0.45	0.05	0.8	47	40	36	33
	29.7855	39.9361	59.6244	121.902	16.2469	15.5625	13.6974	8.78587	5.82325	5.57795	4.90948	3.14906	173.449	222.762	292.725	383.875	12	11.28	12.83	11.69	1	0.28	1.83	0.69	2.54	2.46	3.09	3.92	-0.46	-0.54	0.09	0.92	47	41	36	33
	29.8701	39.6301	59.5948	118.788	16.2143	15.8368	13.9416	9.31921	5.81158	5.67627	4.99699	3.34022	173.592	224.951	297.794	396.779	11.99	11.11	12.56	12.45	0.99	0.11	1.56	1.45	2.58	2.5	2.89	4.05	-0.42	-0.5	-0.11	1.05	47	41	36	32
	30.0135	40.0187	59.8384	118.064	16.3351	15.5298	15.332	9.17599	5.85489	5.56623	5.49533	3.28888	175.726	222.753	328.832	388.298	11.91	11.18	12.5	12.7	0.91	0.18	1.5	1.7	2.6	2.61	2.96	4.01	-0.4	-0.39	-0.04	1.01	47	41	36	32
	29.8864	39.6799	59.577	123.001	16.3164	15.8383	14.9624	8.66338	5.84818	5.67683	5.36288	3.10515	174.781	225.256	319.504	381.938	12.05	11.22	12.62	12.43	1.05	0.22	1.62	1.43	2.75	2.57	2.92	3.98	-0.25	-0.43	-0.08	0.98	47	41	36	32
	29.7442	40.0107	60.006	115.741	16.1392	15.5717	14.7576	9.21022	5.78468	5.58125	5.28945	3.30115	172.061	223.309	317.398	382.078	12.01	11.22	12.52	12.12	1.01	0.22	1.52	1.12	2.68	2.61	3.03	4	-0.32	-0.39	0.03	1	47	41	36	32
	29.9506	39.7009	59.6303	123.558	16.083	15.7123	15.112	9.69928	5.76453	5.63163	5.4165	3.47644	172.651	223.581	322.988	429.544	11.94	11.14	12.56	12.35	0.94	0.14	1.56	1.35	2.59	2.47	2.97	4.05	-0.41	-0.53	-0.03	1.05	47	41	36	32
	29.9028	39.7588	59.3061	116.527	16.3701	15.6034	15.3402	9.96921	5.86742	5.59262	5.49827	3.5732	175.452	222.356	326.081	416.375	12.06	11.09	12.54	12.84	1.06	0.09	1.54	1.84	2.71	2.68	2.91	4.04	-0.29	-0.32	-0.09	1.04	47	41	36	32
	29.8894	39.8804	60.3865	121.457	16.2663	15.6287	15.2107	9.11258	5.83023	5.60167	5.45188	3.26616	174.262	223.397	329.22	396.699	11.98	11.14	12.88	12.43	0.98	0.14	1.88	1.43	2.58	2.47	3.01	3.95	-0.42	-0.53	0.01	0.95	47	41	36	32
	29.8418	40.0641	60.036	119.237	16.1247	15.7953	15.4045	9.77952	5.77947	5.66139	5.52132	3.50521	172.47	226.819	331.478	417.95	11.93	11.21	12.49	12.19	0.93	0.21	1.49	1.19	2.53	2.56	3.04	3.99	-0.47	-0.44	0.04	0.99
	30.021	39.4763	58.9565	116.845	16.5581	15.5342	14.4587	8.58338	5.93479	5.56781	5.18234	3.07648	178.168	219.797	305.532	359.472	12.01	11.06	12.78	12.02	1.01	0.06	1.78	1.02	2.73	2.59	2.98	3.82	-0.27	-0.41	-0.02	0.82
	29.8671	40.2387	60.1745	121.384	16.1516	15.3681	14.4998	9.23615	5.78909	5.50827	5.19704	3.31045	172.903	221.646	312.73	401.835	12.05	11.01	12.6	12.57	1.05	0.01	1.6	1.57	2.6	2.5	3.15	3.86	-0.4	-0.5	0.15	0.86
	29.7471	39.6066	59.6303	118.53	16.2965	15.4401	14.4526	8.7609	5.84106	5.53409	5.18014	3.14011	173.755	219.186	308.893	372.198	11.95	11.11	12.71	12.71	0.95	0.11	1.71	1.71	2.6	2.63	3.1	3.99	-0.4	-0.37	0.1	0.99
	29.9118	39.6458	60.2349	120.579	16.2975	15.4675	15.0559	9.77805	5.84141	5.54391	5.39637	3.50468	174.727	219.793	325.05	422.59	12.14	11.16	12.41	12.17	1.14	0.16	1.41	1.17	2.68	2.46	2.92	4.02	-0.32	-0.54	-0.08	1.02
	29.8611	40.0828	59.3531	119.617	16.4085	15.5942	14.9478	9.59206	5.88117	5.58933	5.35765	3.43801	175.618	224.036	317.993	411.246	12.02	11.15	12.64	12.39	1.02	0.15	1.64	1.39	2.65	2.58	2.99	4	-0.35	-0.42	-0.01	1
	29.8478	39.6223	59.9101	116.913	16.4027	15.3127	15.1672	9.14398	5.87911	5.48843	5.43627	3.27741	175.478	217.464	325.688	383.173	12.06	11.15	12.69	12.78	1.06	0.15	1.69	1.78	2.65	2.45	2.99	4.03	-0.35	-0.55	-0.01	1.03
	29.8404	39.8883	59.7372	122.976	16.2552	15.3996	15.7655	7.42688	5.82623	5.51957	5.65073	2.66197	173.857	220.166	337.558	327.358	12.01	11.16	12.74	12.02	1.01	0.16	1.74	1.02	2.6	2.52	2.95	3.82	-0.4	-0.48	-0.05	0.82
	29.9073	39.8036	59.3354	115.54	16.4983	15.4741	15.0826	9.20777	5.91335	5.54628	5.40597	3.30027	176.852	220.762	320.765	381.314	11.97	11.22	12.56	11.62	0.97	0.22	1.56	0.62	2.66	2.5	2.9	3.77	-0.34	-0.5	-0.1	0.77
	29.9625	40.0695	60.2531	123.916	16.3353	15.6288	15.2309	8.3695	5.85494	5.60171	5.45912	2.99982	175.429	224.457	328.928	371.725	12.06	11.21	12.97	11.9	1.06	0.21	1.97	0.9	2.62	2.54	3	3.84	-0.38	-0.46	0	0.84
	29.8582	39.8406	60.3926	119.142	16.2719	15.3024	15.3337	9.13497	5.83223	5.48471	5.49594	3.27418	174.14	218.515	331.914	390.093	12.03	11.13	12.65	12.54	1.03	0.13	1.65	1.54	2.57	2.49	3.13	3.85	-0.43	-0.51	0.13	0.85
	29.8626	39.6904	59.5061	118.883	16.1437	15.8128	15.6338	8.99769	5.78628	5.66767	5.6035	3.22498	172.793	224.952	333.442	383.394	12.08	11.1	12.92	12.35	1.08	0.1	1.92	1.35	2.64	2.5	3.01	4	-0.36	-0.5	0.01	1
	29.9491	39.7852	59.3648	120.919	16.1328	15.3168	14.9248	8.83375	5.78238	5.4899	5.34938	3.16622	173.177	218.416	317.565	382.856	12.1	11.09	12.65	12.15	1.1	0.09	1.65	1.15	2.7	2.56	2.96	3.93	-0.3	-0.44	-0.04	0.93
	29.753	39.6983	59.8504	117.44	16.2177	15.3384	14.8786	8.5679	5.81281	5.49763	5.33285	3.07093	172.949	218.247	319.173	360.65	12.07	11.27	12.95	12.17	1.07	0.27	1.95	1.17	2.62	2.45	3.11	3.87	-0.38	-0.55	0.11	0.87
	29.9745	40.115	59.8205	123.305	16.4344	15.3158	15.5421	9.06314	5.89047	5.48954	5.57064	3.24844	176.564	220.213	333.238	400.547	11.98	11.18	12.66	13	0.98	0.18	1.66	2	2.62	2.67	3.02	3.98	-0.38	-0.33	0.02	0.98
	29.8641	39.4477	59.5061	117.05	16.4273	15.5533	14.9683	9.67104	5.88792	5.57467	5.36498	3.46632	175.837	219.908	319.249	405.734	11.99	11.13	12.98	12.28	0.99	0.13	1.98	1.28	2.68	2.5	3.24	4.03	-0.32	-0.5	0.24	1.03
	29.8493	39.9494	59.6184	118.367	16.4519	15.9658	14.4418	9.13885	5.89676	5.72252	5.17627	3.27558	176.014	228.611	308.601	387.718	12.04	11.14	12.66	12.25	1.04	0.14	1.66	1.25	2.55	2.56	3.02	4.01	-0.45	-0.44	0.02	1.01
	29.8879	40.0133	60.012	119.737	16.1962	15.5092	14.8992	9.72989	5.80507	5.55886	5.3402	3.48742	173.502	222.429	320.476	417.571	12.01	11.21	12.88	12.67	1.01	0.21	1.88	1.67	2.64	2.54	3.2	3.95	-0.36	-0.46	0.2	0.95
	29.8849	39.9255	59.8563	120.313	16.1723	15.7716	15.578	8.74555	5.79652	5.65292	5.58353	3.13461	173.229	225.695	334.21	377.133	11.91	11.24	12.86	12.75	0.91	0.24	1.86	1.75	2.68	2.54	2.94	4.03	-0.32	-0.46	-0.06	1.03
	29.8745	39.7483	59.6837	118.718	16.2628	15.3202	14.4601	9.32925	5.82897	5.49112	5.18283	3.34382	174.138	218.262	309.331	396.971	12.01	11.07	12.97	12.1	1.01	0.07	1.97	1.1	2.63	2.57	3.09	3.99	-0.37	-0.43	0.09	0.99
	29.8151	40.1284	60.4595	121.408	16.253	15.5331	14.8375	9.1194	5.82546	5.56744	5.31808	3.2686	173.687	223.412	321.529	396.836	12.04	11.02	12.6	12.27	1.04	0.02	1.6	1.27	2.59	2.52	3.12	3.96	-0.41	-0.48	0.12	0.96
	29.9611	39.6327	58.7314	119.166	16.2052	15.6513	14.52	9.19883	5.80832	5.60978	5.20432	3.29707	174.023	222.331	305.657	392.898	12.04	11.09	13.07	12.51	1.04	0.09	2.07	1.51	2.62	2.6	3.62	3.9	-0.38	-0.4	0.62	0.9
	29.9327	39.8248	59.4589	116.392	16.4014	15.5097	14.5922	9.82137	5.87863	5.55904	5.23018	3.5202	175.963	221.388	310.981	409.723	12.09	11.18	12.71	12.56	1.09	0.18	1.71	1.56	2.57	2.52	3.05	3.87	-0.43	-0.48	0.05	0.87
	29.83	39.672	60.4839	119.048	16.3982	15.7033	15.381	9.53799	5.87749	5.62844	5.5129	3.41863	175.325	223.292	333.441	406.98	12.02	11.25	12.69	12.38	1.02	0.25	1.69	1.38	2.5	2.61	3.01	4.02	-0.5	-0.39	0.01	1.02
	29.9476	39.6616	59.2534	121.852	16.1155	15.2533	14.6635	8.75345	5.77618	5.46715	5.25573	3.13744	172.983	216.836	311.42	382.303	12.17	11.26	12.85	12.52	1.17	0.26	1.85	1.52	2.53	2.6	3.13	4.04	-0.47	-0.4	0.13	1.04
	29.8226	40.2226	59.9341	121.017	16.155	15.6789	14.6924	8.37397	5.79034	5.61966	5.2661	3.00142	172.683	226.037	315.619	363.222	12.08	11.29	12.72	12.58	1.08	0.29	1.72	1.58	2.66	2.54	3.11	3.99	-0.34	-0.46	0.11	0.99
	29.8255	39.7272	59.512	115.451	16.1497	15.2835	14.9592	9.1558	5.78844	5.47797	5.36171	3.28165	172.643	217.624	319.086	378.87	12	11.3	12.73	12.59	1	0.3	1.73	1.59	2.55	2.56	3.07	3.97	-0.45	-0.44	0.07	0.97
	29.9133	39.9521	59.5061	125.681	16.3596	15.694	14.9893	9.13722	5.86365	5.62508	5.37251	3.27499	175.401	224.734	319.697	411.603	12.16	11.05	12.51	11.76	1.16	0.05	1.51	0.76	2.59	2.52	3.07	3.86	-0.41	-0.48	0.07	0.86
	29.8641	39.6668	60.1263	113.917	16.3003	15.4876	14.8381	9.71385	5.84239	5.55111	5.31833	3.48167	174.478	220.195	319.771	396.62	12.09	11.09	12.74	12.4	1.09	0.09	1.74	1.4	2.58	2.51	2.86	4.09	-0.42	-0.49	-0.14	1.09
	29.97	39.8857	59.8982	124.948	15.9671	15.5189	15.0624	8.26365	5.72298	5.56233	5.3987	2.96188	171.518	221.857	323.372	370.081	12.08	11.1	12.47	12.48	1.08	0.1	1.47	1.48	2.53	2.62	2.95	3.91	-0.47	-0.38	-0.05	0.91
	29.8969	39.891	60.0721	117.371	16.0997	15.6401	14.8627	9.04409	5.77051	5.60578	5.32714	3.24161	172.52	223.62	320.013	380.471	12.03	11.35	12.65	12.11	1.03	0.35	1.65	1.11	2.65	2.57	3.06	3.38	-0.35	-0.43	0.06	0.38
	29.7885	39.6118	59.7491	116.167	15.9439	15.7172	15.0537	9.21129	5.71466	5.63341	5.39557	3.30154	170.231	223.149	322.38	383.528	12.15	11.25	12.54	11.66	1.15	0.25	1.54	0.66	2.57	2.49	3	3.94	-0.43	-0.51	0	0.94
	29.9252	39.7483	59.6481	126.449	16.3952	15.8474	14.7613	8.56146	5.87642	5.68006	5.29078	3.06862	175.853	225.773	315.585	388.024	12.21	11.25	12.76	12.15	1.21	0.25	1.76	1.15	2.56	2.61	2.99	3.91	-0.44	-0.39	-0.01	0.91
	29.8077	40.0481	60.0661	117.233	16.132	15.2307	15.6707	8.64228	5.78207	5.45902	5.61675	3.09759	172.351	218.623	337.376	363.141	12.02	11.1	12.51	12.15	1.02	0.1	1.51	1.15	2.56	2.57	3.11	3.36	-0.44	-0.43	0.11	0.36
	29.7974	39.8168	59.453	119.904	16.2105	15.8726	14.6427	9.30305	5.81023	5.6891	5.24827	3.33443	173.129	226.522	312.025	399.811	12.09	11.2	12.57	12.47	1.09	0.2	1.57	1.47	2.59	2.56	3.02	3.95	-0.41	-0.44	0.02	0.95
	29.9521	39.7588	59.97	117.005	12.8384	15.3397	15.17	9.05588	4.60158	5.4981	5.43729	3.24584	137.827	218.598	326.074	379.778	12.21	11.21	12.47	12.23	1.21	0.21	1.47	1.23	3.83	2.43	3.04	4.03	0.83	-0.57	0.04	1.03
	29.9715	40.0855	58.9623	119.689	16.0964	15.6305	14.8071	9.07682	5.76933	5.60233	5.30719	3.25334	172.916	224.572	312.924	389.388	12.26	11.11	12.7	12.45	1.26	0.11	1.7	1.45	2.57	2.52	2.91	4.01	-0.43	-0.48	-0.09	1.01
	29.8641	39.5596	60.3197	117.371	16.0084	15.3061	15.2596	8.8789	5.73776	5.48604	5.46941	3.1824	171.353	217.025	329.913	373.521	12.15	11.13	12.57	12.48	1.15	0.13	1.57	1.48	2.54	2.58	2.99	3.94	-0.46	-0.42	-0.01	0.94
	29.8641	39.8195	60.1383	124.224	16.131	15.4193	14.1781	8.13965	5.78171	5.52663	5.08174	2.91744	172.666	220.068	305.607	362.414	12.13	11.12	12.74	11.96	1.13	0.12	1.74	0.96	2.5	2.44	2.93	3.96	-0.5	-0.56	-0.07	0.96
	30.024	39.8459	59.312	115.362	16.1923	15.6676	14.6689	9.21298	5.80368	5.61563	5.25768	3.30214	174.25	223.76	311.843	380.943	12.25	11.1	12.25	11.73	1.25	0.1	1.25	0.73	2.64	2.56	2.92	3.84	-0.36	-0.44	-0.08	0.84
	29.6501	39.8301	60.1504	122.274	16.1346	15.3152	14.9807	8.01482	5.78302	5.48933	5.36941	2.8727	171.467	218.64	322.972	351.257	12.26	11.14	12.84	12.18	1.26	0.14	1.84	1.18	2.57	2.47	3.03	3.68	-0.43	-0.53	0.03	0.68
	30.0481	39.9281	59.7669	121.704	16.1876	15.5613	14.9686	8.57638	5.80201	5.57752	5.36509	3.07397	174.339	222.7	320.655	374.114	12.14	11.1	12.45	12.73	1.14	0.1	1.45	1.73	2.63	2.54	3.02	3.83	-0.37	-0.46	0.02	0.83
	29.6971	39.6066	59.4354	116.822	16.0633	15.4622	15.3073	9.1335	5.75746	5.54201	5.48647	3.27366	170.98	219.5	326.091	382.437	12.15	11.09	12.99	11.48	1.15	0.09	1.99	0.48	2.64	2.44	3.02	3.73	-0.36	-0.56	0.02	0.73
	30.125	40.123	59.8205	120.749	13.3551	15.679	14.9449	8.46962	4.78679	5.61971	5.3566	3.03571	144.202	225.48	320.435	366.557	12.51	11.34	12.69	11.96	1.51	0.34	1.69	0.96	3.65	2.51	3	3.89	0.65	-0.49	0	0.89
	29.7782	39.7325	59.1716	117.693	16.3045	15.6361	14.7318	9.10313	5.84391	5.60433	5.28021	3.26277	174.021	222.674	312.439	384.006	12.32	11.21	12.85	12.23	1.32	0.21	1.85	1.23	2.72	2.56	3.05	3.87	-0.28	-0.44	0.05	0.87
	29.8359	39.8671	60.429	119.928	16.2425	15.6157	14.3937	8.67255	5.8217	5.59704	5.15903	3.10844	173.696	223.138	311.755	372.789	12.27	11.02	12.51	12.87	1.27	0.02	1.51	1.87	2.63	2.51	2.96	3.84	-0.37	-0.49	-0.04	0.84
	29.876	39.9494	60.1866	119.713	16.2046	15.608	14.6584	8.63336	5.80812	5.59427	5.25391	3.0944	173.523	223.488	316.215	370.438	12.14	10.98	12.71	11.96	1.14	-0.02	1.71	0.96	2.67	2.62	2.96	4.02	-0.33	-0.38	-0.04	1.02
	29.9103	39.4867	59.4236	122.324	16.2547	15.7676	15.0947	8.13967	5.82607	5.65146	5.4103	2.91744	174.259	223.157	321.5	356.874	12.12	11.09	12.58	11.82	1.12	0.09	1.58	0.82	2.56	2.46	3.04	3.94	-0.44	-0.54	0.04	0.94
	29.8805	39.9947	59.5948	116.369	16.1437	15.5473	14.4557	8.80899	5.78628	5.57252	5.18125	3.15734	172.897	222.871	308.776	367.418	12.19	11.16	12.83	12.26	1.19	0.16	1.83	1.26	2.52	2.57	3.04	4	-0.48	-0.43	0.04	1
	29.9267	39.7404	59.5297	120.773	16.4134	15.6461	15.2315	9.16673	5.88293	5.60791	5.45934	3.28556	176.057	222.861	324.993	396.807	12.18	11.09	12.52	12.39	1.18	0.09	1.52	1.39	2.67	2.47	2.88	3.84	-0.33	-0.53	-0.12	0.84
	29.8745	39.9574	59.6184	118.859	16.0366	15.5999	14.9902	9.08786	5.74789	5.59138	5.37283	3.2573	171.716	223.417	320.319	387.159	12.09	11	12.66	12	1.09	0	1.66	1	2.55	2.5	2.99	3.98	-0.45	-0.5	-0.01	0.98
	29.876	39.7614	60.2531	118.788	16.3546	15.2993	15.1888	8.85305	5.86185	5.48362	5.44402	3.17314	175.129	218.037	328.019	376.932	12.19	11.2	12.57	11.78	1.19	0.2	1.57	0.78	2.52	2.45	3.02	3.93	-0.48	-0.55	0.02	0.93
	29.8344	39.9122	59.8802	122.299	16.0307	15.5326	15.3049	9.13544	5.74578	5.56725	5.48563	3.27435	171.422	222.201	328.481	400.451	12.13	11.09	12.75	12.61	1.13	0.09	1.75	1.61	2.69	2.42	3.01	3.88	-0.31	-0.58	0.01	0.88
	29.827	39.6852	59.4648	117.763	16.2784	15.776	14.5083	9.14184	5.83455	5.65448	5.20012	3.27664	174.027	224.399	309.224	385.866	12.2	11.16	12.6	12.74	1.2	0.16	1.6	1.74	2.54	2.59	2.95	3.99	-0.46	-0.41	-0.05	0.99
	29.9805	40.0187	59.4648	121.335	16.1796	15.6751	14.231	9.39388	5.79914	5.61833	5.10072	3.36698	173.861	224.838	303.314	408.532	12.2	11.19	12.74	12.01	1.2	0.19	1.74	1.01	2.6	2.47	3.16	3.99	-0.4	-0.53	0.16	0.99
	29.8567	39.6197	60.0901	116.618	16.3444	15.7514	14.8386	9.03445	5.8582	5.64566	5.31848	3.23815	174.907	223.679	319.588	377.627	12.3	11.24	12.71	12.07	1.3	0.24	1.71	1.07	2.71	2.55	3.04	3.92	-0.29	-0.45	0.04	0.92
	29.8389	39.7772	60.0601	118.297	16.1914	15.0986	14.8972	9.17592	5.80337	5.4117	5.33951	3.28886	173.166	215.262	320.691	389.061	12.17	11.22	12.64	12.52	1.17	0.22	1.64	1.52	2.58	2.69	3.02	4.01	-0.42	-0.31	0.02	1.01
	29.9327	40.1016	59.3472	124.559	16.2255	15.6865	15.384	7.67611	5.8156	5.62242	5.51399	2.75129	174.076	225.468	327.24	342.698	12.14	11.17	12.76	12.31	1.14	0.17	1.76	1.31	2.59	2.57	2.97	3.68	-0.41	-0.43	-0.03	0.68
	29.7989	39.604	59.9341	113.96	16.3096	15.4221	14.5735	8.71816	5.84573	5.52762	5.22349	3.12479	174.196	218.916	313.065	356.101	12.18	11.09	12.51	11.54	1.18	0.09	1.51	0.54	2.58	2.44	3.08	3.82	-0.42	-0.56	0.08	0.82
	29.8374	39.9787	59.512	125.76	14.5483	15.349	14.6401	7.86127	5.21446	5.50144	5.24737	2.81766	155.586	219.94	312.281	354.348	12.25	11.17	12.74	11.71	1.25	0.17	1.74	0.71	3.1	2.48	2.91	3.93	0.1	-0.52	-0.09	0.93
	29.9745	39.6904	60.1323	119.928	15.5223	15.4718	14.4462	8.44103	5.56356	5.54544	5.17785	3.02546	166.765	220.101	311.356	362.837	12.2	11.22	12.59	12.42	1.2	0.22	1.59	1.42	3.03	2.6	2.97	3.95	0.03	-0.4	-0.03	0.95
	29.8611	39.7957	59.7253	116.369	16.0053	15.1808	15.2616	9.21933	5.73666	5.44113	5.47011	3.30442	171.303	216.534	326.704	384.533	12.3	11.23	12.79	12.58	1.3	0.23	1.79	1.58	2.62	2.55	3.03	3.96	-0.38	-0.45	0.03	0.96
	29.9312	39.8883	59.5297	120.265	16.076	15.6859	13.9559	8.61451	5.76199	5.62219	5.00211	3.08764	172.463	224.259	297.774	371.333	12.27	11.17	12.49	12.16	1.27	0.17	1.49	1.16	2.6	2.58	3.03	4.03	-0.4	-0.42	0.03	1.03
	29.8181	39.7483	60.3926	118.883	16.1556	15.6014	15.0038	9.08011	5.79054	5.59192	5.3777	3.25452	172.663	222.269	324.773	386.905	12.31	11.12	12.72	12.18	1.31	0.12	1.72	1.18	2.54	2.5	2.94	3.9	-0.46	-0.5	-0.06	0.9
	29.9581	39.9867	58.8293	123.127	16.1705	15.295	15.1488	8.54983	5.79589	5.48207	5.42967	3.06446	173.634	219.21	319.424	377.319	12.32	11.21	12.52	12.48	1.32	0.21	1.52	1.48	2.53	2.69	2.92	3.88	-0.47	-0.31	-0.08	0.88
	29.7855	39.9016	60.5877	115.097	16.342	15.3722	12.7913	9.4824	5.85735	5.50976	4.5847	3.39871	174.464	219.848	277.776	391.181	12.23	11.22	11.78	12.68	1.23	0.22	0.78	1.68	2.69	2.51	3.08	4.08	-0.31	-0.49	0.08	1.08
	29.9446	39.8618	59.4707	121.803	16.1355	15.0962	15.058	8.89105	5.78333	5.41083	5.39712	3.18676	173.18	215.685	320.971	388.156	12.19	11.21	12.26	11.74	1.19	0.21	1.26	0.74	2.55	2.62	2.96	3.95	-0.45	-0.38	-0.04	0.95
	29.7929	39.7667	59.7193	119.904	16.1875	15.4862	15.3834	8.76838	5.80197	5.55062	5.51375	3.14279	172.858	220.73	329.277	376.833	12.27	11.18	12.76	12.25	1.27	0.18	1.76	1.25	2.52	2.58	2.89	3.84	-0.48	-0.42	-0.11	0.84
	30.0135	39.7509	59.9101	120.87	16.2838	15.7163	15.3664	8.95517	5.83648	5.6331	5.50767	3.20974	175.173	223.921	329.965	387.962	12.19	11.18	12.51	12.33	1.19	0.18	1.51	1.33	2.65	2.47	2.99	3.97	-0.35	-0.53	-0.01	0.97
	29.8374	39.8671	59.5356	114.025	16.0762	15.7185	14.9536	9.43859	5.76208	5.63388	5.35973	3.38301	171.925	224.606	319.095	385.748	12.26	11.13	12.92	12.23	1.26	0.13	1.92	1.23	2.65	2.57	3.02	3.94	-0.35	-0.43	0.02	0.94
	29.9416	39.6747	59.577	120.385	16.1293	15.1564	14.996	7.5465	5.78111	5.43241	5.37492	2.70484	173.096	215.529	320.222	325.623	12.35	11.22	12.53	11.71	1.35	0.22	1.53	0.71	2.61	2.5	2.97	3.87	-0.39	-0.5	-0.03	0.87
	29.7501	40.04	59.4413	122.75	15.9363	15.5724	15.3077	8.11483	5.71193	5.58152	5.48662	2.90854	169.931	223.484	326.132	357.022	12.26	11.01	12.82	11.89	1.26	0.01	1.82	0.89	2.64	2.46	2.94	3.88	-0.36	-0.54	-0.06	0.88
	29.9103	39.7852	60.5144	117.578	15.8741	15.5385	15.236	8.47437	5.68966	5.56935	5.46093	3.03741	170.179	221.577	330.465	357.132	12.25	11.1	12.37	11.69	1.25	0.1	1.37	0.69	2.71	2.5	3.02	3.96	-0.29	-0.5	0.02	0.96
	29.9491	39.7483	59.1075	118.671	16.2437	15.5382	14.9231	8.17214	5.82211	5.56925	5.34879	2.92908	174.367	221.368	316.153	347.597	12.2	11.1	12.86	11.37	1.2	0.1	1.86	0.37	2.67	2.48	2.99	3.77	-0.33	-0.52	-0.01	0.77
	29.8389	39.8036	59.755	117.855	16.0778	15.5817	15.2288	7.71463	5.76266	5.58483	5.45836	2.7651	171.951	222.297	326.164	325.881	12.33	11.21	12.51	11.32	1.33	0.21	1.51	0.32	2.67	2.55	2.91	3.85	-0.33	-0.45	-0.09	0.85
	29.9222	39.801	59.23	119.665	15.9045	15.6308	14.341	7.33718	5.70055	5.60245	5.14015	2.62981	170.573	222.983	304.451	314.696	12.23	11.2	12.87	11.18	1.23	0.2	1.87	0.18	2.49	2.44	3.02	3.81	-0.51	-0.56	0.02	0.81
	29.8701	40.0507	60.8581	119.808	16.5187	15.5399	15.3234	8.02976	5.92069	5.56985	5.49227	2.87805	176.852	223.077	334.249	344.814	12.14	11.2	12.61	11.48	1.14	0.2	1.61	0.48	2.67	2.44	3.05	3.9	-0.33	-0.56	0.05	0.9
	29.8389	39.8195	59.1833	119.617	16.4251	15.3239	15.2851	7.86572	5.88714	5.49242	5.47854	2.81925	175.666	218.705	324.238	337.231	12.15	11.07	12.97	10.84	1.15	0.07	1.97	-0.16	2.58	2.56	3.04	3.95	-0.42	-0.44	0.04	0.95
	29.8463	39.6852	30.2084	127.605	15.9551	15.4697	14.7904	7.97807	5.71867	5.54468	5.30121	2.85953	170.681	220.042	160.141	364.89	12.1	11.18	12.55	10.92	1.1	0.18	1.55	-0.08	2.6	2.44	3.1	3.89	-0.4	-0.56	0.1	0.89
	30.036	40.0374	59.2476	113.208	16.5733	15.6652	18.2549	8.68037	5.94026	5.61478	6.54296	3.11124	178.422	224.801	387.655	352.216	12.09	11.22	11.65	11.25	1.09	0.22	0.65	0.25	2.71	2.53	0.98	3.96	-0.29	-0.47	-2.02	0.96
	29.6399	39.6668	58.9912	122.549	16.2879	15.6515	15.9566	7.70624	5.83797	5.60986	5.71921	2.76209	173.037	222.525	337.383	338.492	12.29	11.07	12.63	11.42	1.29	0.07	1.63	0.42	2.54	2.46	2.8	3.84	-0.46	-0.54	-0.2	0.84
	29.8716	40.1016	59.9401	119.237	14.2943	15.3455	14.7503	8.05401	5.12339	5.50016	5.28683	2.88674	153.044	220.565	316.893	344.206	12.26	11.02	12.23	10.85	1.26	0.02	1.23	-0.15	3.33	2.49	2.99	3.92	0.33	-0.51	-0.01	0.92
	29.9252	39.5023	59.8922	117.786	11.9881	15.9823	13.8536	8.46075	4.29682	5.72843	4.96546	3.03253	128.583	226.286	297.392	357.188	12.41	11.17	12.32	11.34	1.41	0.17	1.32	0.34	4.23	2.53	2.93	3.92	1.23	-0.47	-0.07	0.92
	30.036	39.9494	59.9161	121.531	16.2313	15.4649	14.6424	8.73425	5.81768	5.54296	5.24816	3.13056	174.74	221.438	314.449	380.46	12.24	11.02	12.13	12.19	1.24	0.02	1.13	1.19	2.73	2.51	2.97	3.91	-0.27	-0.49	-0.03	0.91
	29.8374	39.9547	59.3472	121.704	15.5789	15.493	14.5326	8.27521	5.58383	5.55305	5.20882	2.96602	166.607	221.871	309.129	360.977	12.25	11.1	12.52	11.71	1.25	0.1	1.52	0.71	2.66	2.67	3.17	3.96	-0.34	-0.33	0.17	0.96
		39.6301	59.4059	118.906	16.1243	15.4006	15.1649	8.3717	5.77932	5.51993	5.43546	3.00061		218.755	322.898	356.791	12.21	11.08	12.51	10.65	1.21	0.08	1.51	-0.35	2.49	2.39	2.91	3.82	-0.51	-0.61	-0.09	0.82
		39.838	59.8683	119.76		15.2783	14.8085	8.52326		5.4761	5.30769	3.05493		218.157	317.763	365.86		11.13	12.54	11.6		0.13	1.54	0.6		2.67	2.96	3.91		-0.33	-0.04	0.91
		40.0133	30.1917	117.948		15.2539	14.8586	8.98661		5.46734	5.32566	3.22101		218.766	160.791	379.91		11.09	12.56	12.19		0.09	1.56	1.19		2.54	3.04	4.12		-0.46	0.04	1.12
		39.8221	58.8351	119.641		15.5488	17.7315	8.1986		5.57306	6.35539	2.93857		221.931	373.92	351.573		11.02	11.73	11.7		0.02	0.73	0.7		2.45	0.78	4.06		-0.55	-2.22	1.06
		39.8486	59.5415	120.144		15.7513	15.9006	8.0924		5.64561	5.69913	2.9005		224.97	339.335	348.479		11.17	12.22	10.9		0.17	1.22	-0.1		2.56	2.82	3.91		-0.44	-0.18	0.91
		39.6223	59.6599	117.394		15.3244	14.4599	8.99447		5.4926	5.18274	3.22383		217.629	309.202	378.457		11.05	12.65	11.61		0.05	1.65	0.61		2.43	3.08	3.76		-0.57	0.08	0.76
		39.9734	60.4108	117.394		15.4872	14.9988	8.52279		5.55098	5.3759	3.05476		221.891	324.762	358.611		11.01	12.37	12.21		0.01	1.37	1.21		2.46	3.14	3.78		-0.54	0.14	0.78
		39.638	59.1833	122.85		15.5294	14.953	8.14179		5.56611	5.35948	2.91821		220.629	317.192	358.502		10.94	12.44	12.26		-0.06	1.44	1.26		2.42	2.97	3.83		-0.58	-0.03	0.83
		39.9893	59.3942	119.57		15.4517	14.4872	8.57634		5.53824	5.19254	3.07396		221.47	308.407	367.552		11.01	12.21	11.36		0.01	1.21	0.36		2.4	2.95	3.89		-0.6	-0.05	0.89
		39.891	59.2125	116.144		15.6139	14.2633	8.78529		5.59639	5.11229	3.14885		223.245	302.711	365.72		11.15	12.39	11.78		0.15	1.39	0.78		2.51	3.05	3.86		-0.49	0.05	0.86
		39.7219	61.4565	119.808		15.4303	14.4267	8.2381		5.53056	5.17085	2.95272		219.685	317.782	353.761		11.09	12.15	12.16		0.09	1.15	1.16		2.39	2.98	3.75		-0.61	-0.02	0.75
		39.8883	58.8466	121.753		15.7203	14.8425	7.91672		5.63452	5.31989	2.83753		224.751	313.057	345.479		11	12.83	11.75		0	1.83	0.75		2.5	2.92	3.85		-0.5	-0.08	0.85
		39.8142	59.7312	121.679		15.5507	13.8245	7.92618		5.57372	4.95502	2.84092		221.913	295.969	345.681		11.03	12.06	10.93		0.03	1.06	-0.07		2.56	2.98	3.83		-0.44	-0.02	0.83
		39.9787	60.4656	116.054		15.3713	14.1886	8.11194		5.50942	5.08553	2.9075		220.259	307.499	337.428		11.08	12.25	11.52		0.08	1.25	0.52		2.34	2.94	4.04		-0.66	-0.06	1.04
		39.8195	59.5061	121.237		15.7939	13.9447	7.64671		5.66089	4.9981	2.74076		225.414	297.417	332.28		11.09	12.15	11.73		0.09	1.15	0.73		2.52	3.08	3.85		-0.48	0.08	0.85
		39.6458	60.4169	119.166		15.3456	13.9031	8.55178		5.50023	4.98318	3.06515		218.061	301.068	365.262		11.18	12.28	11.46		0.18	1.28	0.46		2.41	2.92	3.94		-0.59	-0.08	0.94
		40.0534	59.23	121.286		15.4128	15.9854	8.1106		5.5243	5.72954	2.90702		221.267	339.361	352.58		10.98	12.78	11.28		-0.02	1.78	0.28		2.43	2.9	3.98		-0.57	-0.1	0.98
		39.9122	60.1564	116.891		15.435	15.2814	8.22383		5.53226	5.47722	2.94761		220.805	329.49	344.548		11.02	12.99	11.29		0.02	1.99	0.29		2.43	2.94	3.85		-0.57	-0.06	0.85
		39.4322	59.6481	118.087		15.7498	15.4521	8.3865		5.64508	5.53839	3.00591		222.598	330.354	354.959		11.16	12.8	12.12		0.16	1.8	1.12		2.42	3.04	3.83		-0.58	0.04	0.83
		40.2172	59.2534	119.119		15.5246	15.1425	7.26834		5.56438	5.42741	2.60514		223.783	321.592	310.32		11.05	13.08	10.98		0.05	2.08	-0.02		2.5	3.04	3.56		-0.5	0.04	0.56
		39.6458	59.8384	119		15.3063	15.1926	7.56733		5.48613	5.44536	2.7123		217.502	325.842	322.765		11	12.77	11.14		0	1.77	0.14		2.41	2.96	3.84		-0.59	-0.04	0.84
		39.8221	60.2954	120.7		15.5623	15.2187	7.67		5.57788	5.45472	2.74911		222.123	328.895	331.817		11.06	13.14	11.42		0.06	2.14	0.42		2.41	3.06	3.77		-0.59	0.06	0.77
		40.107	60.1383	121.877		15.5198	15.7206	8.08232		5.56266	5.63462	2.89689		223.101	338.857	353.064		11.09	12.97	11.48		0.09	1.97	0.48		2.5	3.09	3.91		-0.5	0.09	0.91
		39.6642	58.548	120.192		16.0834	15.7463	8.43992		5.76467	5.64384	3.02506		228.651	330.436	363.589		11.19	13.14	11.05		0.19	2.14	0.05		2.13	2.97	3.94		-0.87	-0.03	0.94
		40.2901	60.1383	116.302		16.0361	15.4803	8.7873		5.74772	5.5485	3.14957		231.576	333.677	366.3		11.08	12.91	11.27		0.08	1.91	0.27		2.07	3.01	3.88		-0.93	0.01	0.88
		39.5909	60.2107	119.641		16.1991	15.1264	8.084		5.80612	5.42165	2.89749		229.869	326.441	346.659		11.16	13	11.39		0.16	2	0.39		2.08	3.12	3.92		-0.92	0.12	0.92
		39.3959	59.6362	122.274		15.9454	14.9376	7.6546		5.71519	5.35396	2.74358		225.155	319.29	335.47		10.98	12.96	12.01		-0.02	1.96	1.01		2.07	3.02	3.83		-0.93	0.02	0.83
		39.976	59.7193	116.868		15.8981	15.4072	8.04772		5.69825	5.52231	2.88449		227.794	329.788	337.104		11.06	12.91	10.75		0.06	1.91	-0.25		2.19	3.03	3.43		-0.81	0.03	0.43
		41.2712	60.0601	121.729		16.184	14.9719	7.48829		5.8007	5.36625	2.68397		239.402	322.298	326.716		11.03	12.82	11.31		0.03	1.82	0.31		1.77	3.03	3.86		-1.23	0.03	0.86
		39.7957	59.4943	120.265		21.7464	15.6001	8.13254		7.79441	5.59145	2.91489		310.184	332.659	350.558		10.99	12.82	11.53		-0.01	1.82	0.53		-0.52	3.07	3.82		-3.52	0.07	0.82
		40.1849	58.9971	117.165		22.1561	14.3543	7.85077		7.94125	5.14491	2.8139		319.118	303.534	329.689		10.99	12.79	11.63		-0.01	1.79	0.63		-0.53	2.96	3.92		-3.53	-0.04	0.92
		39.6249	29.8404	122.85		22.7226	15.1472	8.02689		8.14429	5.42912	2.87702		322.717	162.007	353.442		11.1	12.81	11.09		0.1	1.81	0.09		-0.49	3	3.87		-3.49	0	0.87
		39.6301	61.2745	114.242		22.5313	17.07	8.50613		8.07574	6.11827	3.04879		320.043	374.894	348.301		11.11	11.31	11.53		0.11	0.31	0.53		-0.47	0.67	3.74		-3.47	-2.33	0.74
		40.4968	59.3178	120.458		22.9427	15.5252	7.28014		8.22317	5.56458	2.60937		333.012	330.079	314.319		11.1	12.85	11.72		0.1	1.85	0.72		-0.55	2.78	3.59		-3.55	-0.22	0.59
		39.44	59.7669	120.579		22.7388	15.2788	7.98379		8.15012	5.47628	2.86157		321.44	327.301	345.045		10.95	12.7	11.91		-0.05	1.7	0.91		-0.5	2.93	3.77		-3.5	-0.07	0.77
		39.6275	59.2359	118.718		22.4601	15.6716	7.88868		8.05022	5.61707	2.82748		319.01	332.732	335.673		10.94	12.97	11.42		-0.06	1.97	0.42		-0.53	3.06	3.84		-3.53	0.06	0.84
		40.1365	30.2221	119.737		23.1979	15.3578	7.79939		8.31466	5.50458	2.79548		333.721	166.36	334.721		11.19	12.62	11.55		0.19	1.62	0.55		-0.54	3.05	3.6		-3.54	0.05	0.6
		38.8123	58.7544	121.902		21.9083	19.2112	7.02123		7.85244	6.88573	2.51657		304.772	404.567	306.774		11.08	11.86	11.46		0.08	0.86	0.46		0.76	0.7	3.72		-2.24	-2.3	0.72
		40.0481	59.9042	120.385		16.9301	16.7699	8.46817		6.06814	6.01071	3.03519		243.017	360.066	365.392		11.04	12.89	11.75		0.04	1.89	0.75		1.92	2.87	3.73		-1.08	-0.13	0.73
		39.4919	59.3824	118.507		16.8107	16.2179	7.96762		6.02534	5.81287	2.85578		237.952	345.182	338.429		11.01	12.72	11.02		0.01	1.72	0.02		2.01	3.03	3.9		-0.99	0.03	0.9
		39.9441	59.8265	119.213		17.0083	16.688	8.09702		6.09617	5.98135	2.90216		243.506	357.843	345.976		11.12	13.06	11.13		0.12	2.06	0.13		2.15	3.03	3.74		-0.85	0.03	0.74
		39.9574	59.6184	117.624		16.8293	16.7374	8.65318		6.032	5.99906	3.1015		241.023	357.655	364.81		11.02	12.92	12.16		0.02	1.92	1.16		1.97	2.96	3.7		-1.03	-0.04	0.7
		39.4192	60.2773	120.968		16.6719	16.0032	7.26487		5.9756	5.7359	2.6039		235.554	345.745	314.987		11.05	13.11	10.91		0.05	2.11	-0.09		2	2.96	3.73		-1	-0.04	0.73
		40.3741	59.2183	119.641		16.7935	15.3709	7.3227		6.01918	5.50929	2.62462		243.019	326.251	314.013		11.07	12.75	10.84		0.07	1.75	-0.16		2.09	3.16	3.8		-0.91	0.16	0.8
		39.3236	60.2773	120.992		16.846	15.7071	7.32522		6.03799	5.6298	2.62553		237.436	339.349	317.668		11.03	12.98	11.54		0.03	1.98	0.54		1.96	3.01	3.36		-1.04	0.01	0.36
		39.693	59.7669	119.737		17.0621	16.4	7.67921		6.11546	5.87815	2.75241		242.741	351.319	329.564		11.1	12.82	11.63		0.1	1.82	0.63		2	2.96	3.94		-1	-0.04	0.94
		40.5899	59.6007	117.971		16.7772	17.1081	7.31766		6.01335	6.13193	2.62282		244.081	365.467	309.416		11.1	13.12	10.88		0.1	2.12	-0.12		2.09	2.92	3.86		-0.91	-0.08	0.86
		39.1978	60.3561	119.048		16.6741	17.0144	7.51291		5.97638	6.09835	2.6928		234.261	368.072	320.571		11.05	12.8	11.23		0.05	1.8	0.23		1.98	3.01	3.46		-1.02	0.01	0.46
		39.8089	59.3003	118.11		16.5791	17.0197	7.29372		5.94235	6.10025	2.61424		236.558	361.746	308.768		10.98	13.04	11.26		-0.02	2.04	0.26		1.96	3.04	3.8		-1.04	0.04	0.8
		39.9414	59.761	123.305		16.7922	16.701	7.2436		6.0187	5.98604	2.59627		240.395	357.731	320.132		11.13	12.8	11.35		0.13	1.8	0.35		2.06	2.92	3.75		-0.94	-0.08	0.75
		39.9973	59.6718	119.808		16.6284	16.8275	8.77051		5.96001	6.03137	3.14355		238.385	359.903	376.624		11.01	12.91	11.26		0.01	1.91	0.26		1.94	3.04	3.87		-1.06	0.04	0.87
		39.6878	60.2349	117.555		17.1854	16.3619	8.59388		6.15964	5.86449	3.08024		244.462	353.247	362.098		11.05	12.99	11.17		0.05	1.99	0.17		1.96	3.05	3.87		-1.04	0.05	0.87
			59.5002	120.434		16.516	16.5442	8.74873		5.91972	5.92981	3.13574			352.825	377.649		11.04	12.77	12.18		0.04	1.77	1.18		2.12	2.94	3.87		-0.88	-0.06	0.87
			59.7491	119.784			15.9285	8.67746			5.70913	3.1102			341.115	372.553			12.94	12.4			1.94	1.4			2.97	4.05			-0.03	1.05
			59.8325	116.982			16.4484	8.11174			5.89547	2.90743			352.741	340.117			12.89	11.24			1.89	0.24			3.1	3.99			0.1	0.99
			60.012	119.284			17.0367	7.83609			6.10634	2.80863			366.454	335.026			13	11.62			2	0.62			3.08	3.34			0.08	0.34
			58.8986	120.676			15.8658	8.2321			5.68668	2.95057			334.938	356.063			12.75	12.02			1.75	1.02			2.91	3.87			-0.09	0.87
			59.8623	122.001			16.4466	8.34793			5.89483	2.99209			352.878	365.037			12.9	12.06			1.9	1.06			2.91	3.9			-0.09	0.9
			60.0661	115.674			16.0866	8.24886			5.76582	2.95658			346.33	341.999			12.74	10.76			1.74	-0.24			3.19	3.81			0.19	0.81
			59.8384	120.7			15.5928	7.5721			5.58883	2.71402			334.427	327.582			12.93	11.3			1.93	0.3			2.95	3.73			-0.05	0.73
			59.4648	121.507			16.4399	8.08694			5.89244	2.89854			350.393	352.192			12.79	11.92			1.79	0.92			2.96	3.83			-0.04	0.83
			60.2712	121.384			16.1813	8.46887			5.79973	3.03544			349.557	368.453			12.98	11.58			1.98	0.58			2.99	3.87			-0.01	0.87
			59.0958	117.486			16.0677	8.64516			5.75902	3.09862			340.334	364.044			12.8	11.38			1.8	0.38			2.9	3.63			-0.1	0.63
			60.6306	115.652			16.8007	8.36663			6.02176	2.99879			365.102	346.815			13.04	11.72			2.04	0.72			2.89	3.78			-0.11	0.78
			59.1833	123.254			16.75	7.52628			6.00359	2.69759			355.312	332.489			12.65	11.77			1.65	0.77			3.01	3.54			0.01	0.54
			60.024	117.716			16.2575	7.43345			5.82707	2.66432			349.764	313.634			13.04	11.1			2.04	0.1			2.9	3.9			-0.1	0.9
			59.2008	119.713			16.2941	8.17803			5.84019	2.93119			345.744	350.901			12.84	11.48			1.84	0.48			2.89	3.81			-0.11	0.81
			60.423	121.163			16.0466	7.6111			5.75147	2.72799			347.521	330.532			13.11	11.39			2.11	0.39			2.92	3.64			-0.08	0.64
			59.6837	119.665			16.3785	7.74403			5.87044	2.77564			350.369	332.147			12.92	11.44			1.92	0.44			2.99	3.79			-0.01	0.79
			59.4825	116.167			15.7577	7.46176			5.6479	2.67447			335.951	310.683			13.05	10.94			2.05	-0.06			2.99	3.74			-0.01	0.74
			59.6481	119.952			15.8194	7.71995			5.67005	2.76701			338.208	331.908			12.94	10.75			1.94	-0.25			2.94	3.82			-0.06	0.82
			60.1504	118.507			16.1828	7.8046			5.80028	2.79735			348.889	331.505			13.05	11.4			2.05	0.4			2.97	3.79			-0.03	0.79
			59.9101	120.216			16.4756	7.53852			5.90524	2.70198			353.784	324.822			12.92	11.35			1.92	0.35			2.94	3.75			-0.06	0.75
			59.23	122.125			16.4459	7.74047			5.89458	2.77436			349.136	338.819			13.09	10.76			2.09	-0.24			2.96	3.72			-0.04	0.72
			60.0841	120.361			15.5435	8.52161			5.57115	3.05434			334.738	367.624			12.85	10.87			1.85	-0.13			3.03	3.9			0.03	0.9
			59.5297	121.114			16.7013	8.10446			5.98614	2.90482			356.353	351.816			13.11	11.02			2.11	0.02			2.93	3.87			-0.07	0.87
			59.9101	116.732			15.8761	9.21995			5.69036	3.30464			340.91	385.756			12.91	11.96			1.91	0.96			2.9	3.96			-0.1	0.96
			59.7312	120.192			16.7608	8.07765			6.00747	2.89522			358.833	347.983			12.97	11.63			1.97	0.63			3.03	3.94			0.03	0.94
			59.7967	121.237			17.2037	8.48192			6.16621	3.04012			368.719	368.573			12.8	11.33			1.8	0.33			2.85	3.61			-0.15	0.61
			59.5002	117.348			15.5934	7.65068			5.58905	2.74218			332.549	321.789			12.86	11.84			1.86	0.84			3.03	3.89			0.03	0.89
			60.3682	120.168			16.9768	7.62959			6.08489	2.73462			367.334	328.615			12.95	11.45			1.95	0.45			2.94	3.8			-0.06	0.8
			59.512	121.065			16.1765	7.61792			5.79803	2.73044			345.052	330.562			12.93	10.82			1.93	-0.18			3.03	3.91			0.03	0.91
			59.512	117.739			16.5539	8.10417			5.9333	2.90472			353.102	342			12.95	11.13			1.95	0.13			2.9	3.83			-0.1	0.83
			60.0721	117.809			15.816	8.76291			5.6688	3.14083			340.537	370.017			12.69	11.75			1.69	0.75			3.06	3.8			0.06	0.8
			59.5888	118.835			16.9437	7.97812			6.07301	2.85954			361.884	339.815			12.84	11.99			1.84	0.99			3.03	3.89			0.03	0.89
			59.2593	118.812			15.8883	8.25702			5.69472	2.95951			337.465	351.625			12.58	10.96			1.58	-0.04			2.95	3.89			-0.05	0.89
			60.3258	121.433			15.5529	7.77524			5.57452	2.78683			336.287	338.412			12.84	10.98			1.84	-0.02			2.92	3.74			-0.08	0.74
			59.8146	118.788			15.3259	7.27636			5.49317	2.60801			328.571	309.802			12.64	11.61			1.64	0.61			3.01	3.59			0.01	0.59
			59.7907	122.274			16.4325	7.46172			5.88978	2.67445			352.154	327.017			12.95	11.32			1.95	0.32			2.86	3.73			-0.14	0.73
			59.8205	121.581			16.7008	8.34586			5.98594	2.99135			358.082	363.69			12.74	11.25			1.74	0.25			2.87	3.78			-0.13	0.78
			59.9281	118.718			16.421	7.97886			5.88566	2.85981			352.716	339.51			12.92	11.25			1.92	0.25			3.04	3.86			0.04	0.86
			59.3648	118.11			15.4056	8.90297			5.52173	3.19103			327.797	376.893			12.81	12.06			1.81	1.06			3.01	3.86			0.01	0.86
			59.4177	117.555			16.0465	7.87467			5.75144	2.82246			341.737	331.794			12.99	11.31			1.99	0.31			2.85	3.86			-0.15	0.86
			60.1022	118.624			16.8712	7.45144			6.04704	2.67077			363.44	316.817			12.82	10.52			1.82	-0.48			2.94	3.8			-0.06	0.8
			60.3865	119.952			16.3264	8.00157			5.85176	2.86795			353.367	344.016			13.03	11.7			2.03	0.7			3.04	3.77			0.04	0.77
			59.09	122.349			16.3274	8.20661			5.8521	2.94144			345.801	359.882			12.9	12.01			1.9	1.01			2.95	3.83			-0.05	0.83
			59.958	116.822			16.3643	8.39739			5.86535	3.00982			351.675	351.614			12.95	11.57			1.95	0.57			2.98	3.91			-0.02	0.91
			59.6718	126.476			16.3938	7.78318			5.87591	2.78967			350.626	352.825			12.91	11.17			1.91	0.17			3.03	3.88			0.03	0.88
			59.4825	114.723			15.9648	9.28365			5.72216	3.32747			340.368	381.737			12.96	11.77			1.96	0.77			3.01	3.95			0.01	0.95
			59.8802	120.216			15.8635	7.66436			5.68584	2.74708			340.469	330.244			12.71	11.86			1.71	0.86			2.95	3.79			-0.05	0.79
			59.9281	121.041			15.6752	7.98286			5.61836	2.86124			336.698	346.327			12.95	11.04			1.95	0.04			3.03	3.88			0.03	0.88
			59.23	120.749			15.547	8.05874			5.57242	2.88844			330.054	348.775			12.78	10.65			1.78	-0.35			3.02	3.83			0.02	0.83
			60.5449	116.009			15.8683	7.81771			5.68758	2.80205			344.354	325.063			12.87	11.21			1.87	0.21			2.89	3.87			-0.11	0.87
			59.4825	121.507			16.2768	8.50197			5.834	3.0473			347.021	370.267			12.84	11.53			1.84	0.53			2.92	3.71			-0.08	0.71
			59.8922	116.982			16.6148	7.74639			5.95513	2.77648			356.666	324.798			12.77	10.8			1.77	-0.2			3.02	3.82			0.02	0.82
			59.976	118.25			16.2981	7.74845			5.8416	2.77722			350.356	328.406			12.69	11.16			1.69	0.16			2.92	3.39			-0.08	0.39
			59.2944	121.926			16.7545	8.30998			6.0052	2.97849			356.074	363.156			12.74	11.8			1.74	0.8			2.99	3.84			-0.01	0.84
			59.8444	116.573			15.1475	8.8213			5.42922	3.16175			324.908	368.574			12.92	11.91			1.92	0.91			3.08	3.93			0.08	0.93
			59.976	120.7			15.8275	8.18827			5.67294	2.93486			340.24	354.238			12.58	10.86			1.58	-0.14			3.04	3.76			0.04	0.76
			59.1191	122.875			15.5036	8.28892			5.55684	2.97094			328.515	365.055			13	11.51			2	0.51			2.86	3.88			-0.14	0.88
			60.2531	119.856			15.8238	8.02343			5.67163	2.87578			341.733	344.68			12.61	11.76			1.61	0.76			2.96	3.86			-0.04	0.86
			59.9341	118.859			15.6101	8.31493			5.59502	2.98026			335.332	354.231			12.84	11.82			1.84	0.82			3.02	3.33			0.02	0.33
			59.6718	115.585			16.771	8.58429			6.0111	3.07681			358.693	355.632			12.62	10.81			1.62	-0.19			2.94	3.86			-0.06	0.86
			59.6837	121.877			16.3925	7.85833			5.87545	2.81661			350.669	343.279			12.94	11.19			1.94	0.19			2.89	3.8			-0.11	0.8
			59.654	120.265			15.8862	7.67672			5.69397	2.75151			339.668	330.91			12.72	11.79			1.72	0.79			3.03	3.83			0.03	0.83
			60.1685	117.348			16.6829	7.74086			5.97953	2.7745			359.779	325.582			12.96	11.5			1.96	0.5			2.95	3.95			-0.05	0.95
			59.5652	120.096			15.8357	7.28724			5.67587	2.61191			338.084	313.681			12.83	10.65			1.83	-0.35			3.06	3.75			0.06	0.75
			59.9401	119.88			16.046	7.48806			5.75127	2.68389			344.732	321.745			13.11	10.98			2.11	-0.02			3.11	3.47			0.11	0.47
			59.7253	118.906			16.3439	7.62572			5.85804	2.73323			349.873	324.998			12.74	11.75			1.74	0.75			3.05	3.8			0.05	0.8
			59.1949	119.213			15.8144	7.9104			5.66825	2.83527			335.532	338.001			12.91	11.37			1.91	0.37			2.99	3.82			-0.01	0.82
			60.49	118.788			16.5075	7.29264			5.91668	2.61385			357.9	310.495			12.84	10.86			1.84	-0.14			2.99	3.71			-0.01	0.71
			59.5061	118.883			16.3671	7.81263			5.86633	2.80022			349.083	332.898			12.98	11.47			1.98	0.47			3.14	3.8			0.14	0.8
			60.4534	120.627			15.8143	7.63382			5.6682	2.73614			342.662	330.052			12.86	11.58			1.86	0.58			2.94	3.78			-0.06	0.78
			59.0958	120.627			17.0185	8.3495			6.09981	2.99265			360.473	360.995			13.19	11.3			2.19	0.3			3.09	3.74			0.09	0.74
			59.6007	120.627			16.2054	8.0175			5.80839	2.87366			346.184	346.641			12.87	11.03			1.87	0.03			3.08	3.9			0.08	0.9
			59.8146	119.474			15.8162	7.52566			5.66887	2.69737			339.081	322.266			13.06	11.11			2.06	0.11			3.01	3.34			0.01	0.34
			59.3531	119.856			15.2786	8.03056			5.47619	2.87834			325.029	344.987			12.71	11.57			1.71	0.57			2.87	3.83			-0.13	0.83
			61.5385	117.44			15.784	8.18065			5.65734	2.93213			348.144	344.349			12.98	11.37			1.98	0.37			3.17	3.86			0.17	0.86
			59.4589	121.778			15.8947	8.38588			5.69704	3.00569			338.74	366.027			13	10.95			2	-0.05			3.13	3.86			0.13	0.86
			59.1075	117.647			15.7867	7.81844			5.65831	2.80231			334.448	329.683			12.81	11.16			1.81	0.16			2.99	3.86			-0.01	0.86
			59.3296	121.017			15.5653	8.38059			5.57897	3.0038			330.998	363.509			12.82	12.04			1.82	1.04			2.93	3.79			-0.07	0.79
			59.9221	123.127			15.5026	7.14693			5.55648	2.56162			332.956	315.406			12.73	11			1.73	0			3.05	3.81			0.05	0.81
			59.6956	114.745			15.5503	8.01746			5.5736	2.87364			332.719	329.735			12.88	11.31			1.88	0.31			2.99	3.91			-0.01	0.91
			60.344	120.992			15.8662	6.88614			5.68682	2.46815			343.165	298.627			12.66	11.57			1.66	0.57			2.97	3.81			-0.03	0.81
			59.1658	117.786			15.7137	7.58294			5.63215	2.7179			333.23	320.129			12.85	11.6			1.85	0.6			3.07	3.93			0.07	0.93
			59.3942	118.46			16.9436	7.30979			6.07299	2.62			360.7	310.365			12.56	10.73			1.56	-0.27			2.85	3.86			-0.15	0.86
			59.8504	120.87			16.321	7.30812			5.8498	2.6194			350.113	316.607			12.88	11			1.88	0			2.87	3.83			-0.13	0.83
			60.6612	121.507			15.7295	7.32424			5.63782	2.62518			341.997	318.976			12.66	11.55			1.66	0.55			3.08	3.85			0.08	0.85
			58.6797	118.367			16.0079	8.36836			5.7376	2.99941			336.681	355.03			13.08	11.68			2.08	0.68			3.1	3.87			0.1	0.87
			60.2228	117.971			15.8379	7.86982			5.67667	2.82072			341.865	332.763			12.69	10.63			1.69	-0.37			2.96	3.9			-0.04	0.9
			59.6007	119.427			15.5547	7.18636			5.57516	2.57576			332.283	307.614			12.99	11.03			1.99	0.03			3.03	3.62			0.03	0.62
			60	121.335			15.9329	6.83965			5.71071	2.45149			342.643	297.451			12.69	11.7			1.69	0.7			2.94	3.8			-0.06	0.8
			59.4589	119.593			16.1061	8.1679			5.7728	2.92756			343.244	350.117			12.91	11.81			1.91	0.81			2.96	3.88			-0.04	0.88
			60.1624	117.348			15.7706	8.47913			5.65256	3.03912			340.072	356.634			12.67	11.37			1.67	0.37			2.97	3.89			-0.03	0.89
			59.4589	121.704			15.3545	7.73355			5.50339	2.77188			327.226	337.349			12.94	11.5			1.94	0.5			3.1	3.83			0.1	0.83
			59.9101	119.904			15.5552	7.38494			5.57534	2.64693			334.019	317.378			12.83	11.62			1.83	0.62			3.03	3.62			0.03	0.62
			59.1541	122.474			16.6446	8.24645			5.96579	2.95572			352.901	361.998			12.97	11.48			1.97	0.48			2.97	3.88			-0.03	0.88
			60.7841	115.92			15.6075	8.53099			5.59408	3.0577			340.031	354.448			12.73	11.27			1.73	0.27			3	3.9			0	0.9
				122.574			17.0802	7.71264			6.12192	2.76439				338.842			13.01	11.55			2.01	0.55			3.06	3.92			0.06	0.92
				113.809				7.73377				2.77196				315.474				11.83				0.83				3.86				0.86
				121.704				7.30803				2.61937				318.787				11.02				0.02				3.73				0.73
				122.05				7.38236				2.64601				322.946				10.97				-0.03				3.81				0.81
				117.028				8.03689				2.88061				337.11				11.38				0.38				3.79				0.79
				118.507				7.50295				2.68923				318.692				11.83				0.83				3.77				0.77
				120.652				7.98848				2.86325				345.456				10.93				-0.07				3.81				0.81
				120.168				8.05127				2.88576				346.777				11.3				0.3				3.94				0.94
				122.399				8.44561				3.0271				370.514				11.35				0.35				3.89				0.89
				119.522				8.91582				3.19563				381.948				11.99				0.99				3.99				0.99
				116.122				8.10886				2.9064				337.496				11.14				0.14				3.9				0.9
				121.655				6.36444				2.28116				277.513				11.12				0.12				3.94				0.94
				120.313				7.4424				2.66753				320.938				11.32				0.32				3.87				0.87
				116.099				7.62851				2.73423				317.442				11.2				0.2				3.79				0.79
				119.237				7.2465				2.59731				309.695				10.64				-0.36				3.81				0.81
				121.581				7.1281				2.55487				310.623				10.82				-0.18				3.76				0.76
				122.2				6.91166				2.4773				302.725				11.12				0.12				3.5				0.5
				118.017				8.22989				2.94978				348.125				11.47				0.47				3.85				0.85
				120				8.10821				2.90617				348.74				10.9				-0.1				3.74				0.74
				116.527				7.78795				2.79138				325.272				11.89				0.89				3.93				0.93
				120.24				7.77458				2.78659				335.061				11.69				0.69				3.81				0.81
				119.474				8.07096				2.89282				345.617				11.96				0.96				3.85				0.85
				122.374				8.83923				3.16818				387.704				11.12				0.12				3.91				0.91
				118.977				8.30956				2.97834				354.353				11.89				0.89				3.93				0.93
				119.451				8.26671				2.96298				353.929				12.17				1.17				3.99				0.99
				120.434				8.24802				2.95628				356.035				11.3				0.3				3.86				0.86
				118.483				8.6085				3.08548				365.579				11.21				0.21				3.92				0.92
				119.665				7.7312				2.77104				331.596				11.55				0.55				3.75				0.75
				120.048				8.22349				2.94749				353.84				11.86				0.86				3.94				0.94
				115.296				7.91994				2.83869				327.289				10.87				-0.13				3.88				0.88
				123.762				7.76336				2.78257				344.377				10.84				-0.16				3.8				0.8
				117.463				7.19346				2.5783				302.855				11.28				0.28				3.84				0.84
				118.18				7.24926				2.5983				307.067				11.51				0.51				3.8				0.8
				120.943				8.57595				3.07382				371.758				10.86				-0.14				3.68				0.68
				118.577				7.64962				2.7418				325.114				11.29				0.29				3.83				0.83
				121.852				7.4311				2.66347				324.55				11.55				0.55				3.79				0.79
				116.982				7.45999				2.67383				312.79				11.7				0.7				4				1
				121.729				7.88321				2.82552				343.947				10.96				-0.04				3.86				0.86
				125.576				8.13246				2.91486				366.035				11.43				0.43				3.93				0.93
				113.895				8.69241				3.11556				354.847				13.6				2.6				4.05				1.05
				119.166				7.57226				2.71407				323.425				12.1				1.1				4.07				1.07
				120.797				7.43896				2.6663				322.081				10.85				-0.15				3.87				0.87
				120.096				8.57128				3.07214				368.952				11.62				0.62				3.88				0.88
				118.765				8.70471				3.11997				370.542				12.19				1.19				3.85				0.85
				118.32				8.28137				2.96823				351.201				11.65				0.65				3.99				0.99
				117.417				7.54669				2.70491				317.602				10.7				-0.3				3.95				0.95
				124.585				7.86014				2.81726				350.987				11.68				0.68				3.91				0.91
				119.76				8.81299				3.15878				378.297				11.79				0.79				3.94				0.94
				116.641				8.44962				3.02854				353.251				11.86				0.86				4.01				1.01
				122.649				7.63065				2.735				335.446				11.09				0.09				3.88				0.88
				117.693				7.94059				2.84609				334.966				11.34				0.34				3.9				0.9
				123.026				7.64236				2.7392				336.994				12.12				1.12				3.86				0.86
				114.965				9.18177				3.29096				378.344				11.41				0.41				3.88				0.88
				119.689				8.48836				3.04242				364.144				11.65				0.65				3.91				0.91
				120.096				8.26451				2.96219				355.747				11.83				0.83				3.89				0.89
				121.704				8.83343				3.16611				385.327				12.37				1.37				3.75				0.75
				117.971				8.83086				3.16518				373.399				11.41				0.41				3.97				0.97
				120.579				8.54486				3.06267				369.293				11.74				0.74				4.02				1.02
				120.048				8.06039				2.88903				346.822				12				1				4.02				1.02
				119.617				8.3413				2.98971				357.621				12.03				1.03				3.94				0.94
				118.694				7.9992				2.8671				340.308				11.12				0.12				3.77				0.77
				120.603				8.45804				3.03155				365.615				11.43				0.43				3.89				0.89
				118.741				9.01556				3.23138				383.699				11.99				0.99				3.89				0.89
				119.76				7.81499				2.80107				335.458				11.72				0.72				3.89				0.89
				119.048				7.83344				2.80768				334.248				11.07				0.07				3.88				0.88
				116.641				8.46526				3.03414				353.905				11.52				0.52				3.81				0.81
				121.114				7.59783				2.72324				329.823				11.75				0.75				3.55				0.55
				117.394				7.44615				2.66887				313.309				11.4				0.4				3.89				0.89
				122.349				7.65177				2.74257				335.551				11.31				0.31				3.83				0.83
				120.773				7.73991				2.77416				335.044				11.14				0.14				3.92				0.92
				117.096				7.91413				2.83661				332.155				11.75				0.75				3.88				0.88
				121.114				7.75222				2.77857				336.525				10.97				-0.03				3.35				0.35
				120.385				8.18848				2.93494				353.323				11.02				0.02				3.86				0.86
				119.261				8.12711				2.91294				347.399				11.39				0.39				3.82				0.82
				117.878				8.10594				2.90535				342.478				11.68				0.68				3.87				0.87
				121.09				7.42077				2.65977				322.071				10.64				-0.36				3.83				0.83
				117.878				7.7856				2.79054				328.944				11.71				0.71				3.88				0.88
				121.114				8.09288				2.90068				351.313				11.88				0.88				3.91				0.91
				120.024				8.66041				3.10409				372.565				11.95				0.95				3.93				0.93
				119.76				8.70305				3.11937				373.577				11.26				0.26				3.89				0.89
				117.739				7.88728				2.82698				332.847				11.52				0.52				3.93				0.93
				121.212				8.15848				2.92418				354.447				12.21				1.21				3.89				0.89
				118.835				7.97805				2.85952				339.812				12.13				1.13				3.93				0.93
				118.788				7.62599				2.73333				324.688				11.23				0.23				3.93				0.93
				120.024				7.48059				2.68121				321.81				11.37				0.37				3.9				0.9
				119.808				7.87459				2.82243				338.151				11.8				0.8				3.82				0.82
				118.624				8.56014				3.06815				363.956				11.6				0.6				3.95				0.95
				118.11				7.41047				2.65608				313.711				11.07				0.07				3.91				0.91
				120.458				7.59906				2.72368				328.088				11.4				0.4				3.84				0.84
				119.119				7.83745				2.80912				334.619				11.76				0.76				3.82				0.82
				122.524				8.01657				2.87332				352.051				11.47				0.47				3.77				0.77
				117.925				8.39612				3.00936				354.878				11.02				0.02				3.87				0.87
				120.579				8.13942				2.91735				351.771				11.34				0.34				3.82				0.82
				118.694				8.2492				2.9567				350.944				11.98				0.98				3.84				0.84
				117.188				8.10002				2.90323				340.223				11.37				0.37				3.91				0.91
				119.451				7.32122				2.62409				313.449				11.16				0.16				3.82				0.82
				123.533				7.86373				2.81854				348.183				11.57				0.57				3.76				0.76
				118.788				8.16213				2.9255				347.515				12.07				1.07				3.96				0.96
				119.808				7.56491				2.71144				324.853				10.88				-0.12				3.88				0.88
				117.21				8.95644				3.21019				376.268				11.22				0.22				3.8				0.8
				122.875				8.55287				3.06555				376.68				11.87				0.87				3.89				0.89
				115.451				7.98958				2.86365				330.612				11.86				0.86				3.89				0.89
				123.052				7.39706				2.65128				326.244				11.02				0.02				3.89				0.89
				118.46				7.74693				2.77668				328.925				11.05				0.05				3.89				0.89
				118.812				7.88446				2.82597				335.759				11.59				0.59				3.78				0.78
				118.46				7.38647				2.64748				313.62				11.61				0.61				3.69				0.69
				118.227				7.29483				2.61463				309.119				10.81				-0.19				3.84				0.84
				119.546				7.58417				2.71834				324.966				10.92				-0.08				3.81				0.81
				119.713				7.49111				2.68499				321.427				11.39				0.39				3.79				0.79
				119.76				7.70343				2.76109				330.669				11.34				0.34				3.74				0.74
				120.53				7.59972				2.72391				328.314				10.89				-0.11				3.84				0.84
				119.427				7.5592				2.70939				323.574				11.43				0.43				3.88				0.88
				122.274				7.63313				2.73589				334.529				11.65				0.65				3.82				0.82
				119.308				7.99781				2.8666				342.008				11.14				0.14				3.84				0.84
				119.689				8.38659				3.00595				359.778				10.9				-0.1				3.83				0.83
				121.433				8.42346				3.01916				366.625				11.22				0.22				3.77				0.77
				118.32				8.12199				2.91111				344.442				11.87				0.87				4.05				1.05
				120.192				8.12222				2.91119				349.903				11.37				0.37				3.94				0.94
				115.808				7.71175				2.76407				320.1				10.96				-0.04				3.81				0.81
				121.803				7.19132				2.57753				313.95				11.25				0.25				3.68				0.68
				119.832				8.07142				2.89298				346.672				11.66				0.66				3.87				0.87
				120.385				8.26087				2.96089				356.447				11.23				0.23				3.93				0.93
				117.925				8.66496				3.10572				366.241				11.16				0.16				3.88				0.88
				119.952				7.62358				2.73247				327.765				11.48				0.48				3.84				0.84
				118.507				7.8503				2.81373				333.446				11.69				0.69				3.97				0.97
				117.971				7.25805				2.60145				306.896				11.01				0.01				3.83				0.83
				120.943				8.1217				2.911				352.066				11.08				0.08				3.82				0.82
				121.359				7.70853				2.76291				335.305				11.75				0.75				3.98				0.98
				117.096				8.04353				2.88298				337.586				11.51				0.51				3.91				0.91
				117.463				7.5001				2.68821				315.764				10.78				-0.22				3.74				0.74
				127.66				7.59957				2.72386				347.727				11.33				0.33				3.9				0.9
				114.723				7.68025				2.75278				315.806				11.79				0.79				3.89				0.89
				121.335				7.62747				2.73386				331.712				11.58				0.58				3.75				0.75
				116.868				7.66583				2.74761				321.108				11.67				0.67				3.94				0.94
				123.406				7.47367				2.67873				330.572				11.57				0.57				3.94				0.94
				119.308				8.31919				2.98179				355.751				11.9				0.9				3.99				0.99
				116.212				7.96484				2.85478				331.758				11.41				0.41				3.99				0.99
				119.546				7.26284				2.60317				311.198				10.86				-0.14				3.77				0.77
				118.671				7.66363				2.74682				325.968				11.48				0.48				3.86				0.86
				123.254				7.62322				2.73234				336.771				11.75				0.75				3.79				0.79
				119.522				8.67461				3.10918				371.615				11.36				0.36				3.83				0.83
				119.713				8.34405				2.9907				358.025				11.55				0.55				3.96				0.96
				120.555				7.96431				2.85459				344.134				11.94				0.94				3.92				0.92
				117.394				8.54595				3.06306				359.585				11.84				0.84				3.8				0.8
				119.071				7.81757				2.80199				333.637				10.81				-0.19				3.86				0.86
				118.041				7.27265				2.60669				307.695				10.94				-0.06				3.82				0.82
				120.24				7.32924				2.62697				315.868				11.55				0.55				3.87				0.87
				117.809				7.58783				2.71965				320.399				11.99				0.99				3.85				0.85
				120.676				7.08173				2.53825				306.306				10.67				-0.33				3.8				0.8
				123.203				7.13216				2.55633				314.948				11.17				0.17				3.87				0.87
				119.522				8.36343				2.99765				358.284				11.72				0.72				3.84				0.84
				117.21				8.31838				2.9815				349.463				11.58				0.58				3.84				0.84
				124.559				6.95107				2.49142				310.329				10.83				-0.17				3.88				0.88
				117.073				8.53241				3.05821				358.034				11.17				0.17				3.79				0.79
				120				8.36064				2.99664				359.597				11.74				0.74				3.78				0.78
				117.279				8.18605				2.93407				344.105				11.6				0.6				3.89				0.89
				119.689				7.60877				2.72716				326.41				10.99				-0.01				3.9				0.9
				117.279				7.528				2.69821				316.443				11.42				0.42				3.98				0.98
				120.385				7.04423				2.52481				303.95				11.5				0.5				3.7				0.7
				120.24				7.72397				2.76845				332.88				11.63				0.63				3.78				0.78
				117.325				7.76516				2.78321				326.54				11.07				0.07				3.81				0.81
				123.813				7.38781				2.64796				327.853				11.29				0.29				3.8				0.8
				120.361				8.05005				2.88532				347.281				11.78				0.78				3.81				0.81
				118.157				7.90732				2.83417				334.876				11.29				0.29				3.91				0.91
				119.498				8.3658				2.9985				358.315				11.16				0.16				3.82				0.82
				120.024				7.91742				2.83779				340.602				11.35				0.35				3.82				0.82
				121.041				7.91296				2.83619				343.295				11.9				0.9				4.01				1.01
				119.332				7.80453				2.79732				333.809				11.15				0.15				3.83				0.83
				114.635				8.33299				2.98674				342.385				11.4				0.4				3.94				0.94
				125.287				7.46867				2.67694				335.386				11.48				0.48				3.86				0.86
				118.087				8.64013				3.09682				365.694				11.62				0.62				3.86				0.86
				120.53				8.00668				2.86978				345.895				11.21				0.21				3.95				0.95
				117.233				8.94284				3.20532				375.77				11.42				0.42				3.9				0.9
				118.624				7.75663				2.78015				329.793				11.46				0.46				3.79				0.79
				117.44				7.86346				2.81845				330.998				11.72				0.72				3.73				0.73
				121.433				7.64061				2.73857				332.553				10.98				-0.02				3.79				0.79
				121.433				8.07597				2.89461				351.501				11.47				0.47				3.87				0.87
				119.474				7.39433				2.6503				316.642				11.35				0.35				3.44				0.44
				119.617				7.6132				2.72875				326.405				11.67				0.67				3.91				0.91
				118.367				8.36362				2.99771				354.829				10.73				-0.27				3.81				0.81
				121.163				7.64528				2.74024				332.017				11.12				0.12				3.76				0.76
				120.168				7.89607				2.83013				340.092				11.61				0.61				3.8				0.8
				118.601				8.44238				3.02594				358.878				11.72				0.72				3.83				0.83
				120.627				8.01492				2.87273				346.53				10.98				-0.02				3.75				0.75
				115.119				7.48657				2.68336				308.906				11.19				0.19				3.81				0.81
				120.096				6.98807				2.50468				300.803				11.62				0.62				3.9				0.9
				120.846				7.13878				2.5587				309.209				11.32				0.32				3.83				0.83
				117.578				8.15802				2.92402				343.8				10.93				-0.07				3.87				0.87
				121.163				8.19228				2.9363				355.771				11.68				0.68				3.99				0.99
				118.624				7.19236				2.57791				305.802				11.92				0.92				3.91				0.91
				118.133				7.16427				2.56784				303.348				11.44				0.44				3.82				0.82
				120.87				7.72692				2.76951				334.751				11.17				0.17				3.82				0.82
				123.609				7.79128				2.79257				345.188				11.4				0.4				3.83				0.83
				117.971				8.4506				3.02889				357.321				11.78				0.78				3.89				0.89
				118.087				7.68917				2.75597				325.445				11.42				0.42				3.93				0.93
				120.289				7.80483				2.79743				336.499				11.14				0.14				3.85				0.85
				117.486				7.41023				2.656				312.042				11.39				0.39				3.92				0.92
				120.555				7.42799				2.66236				320.96				11.52				0.52				3.9				0.9
				121.605				7.44258				2.66759				324.393				11.24				0.24				3.84				0.84
				119.88				7.53444				2.70052				323.738				11.08				0.08				3.42				0.42
				117.786				8.30419				2.97641				350.579				11.85				0.85				3.88				0.88
				120.846				7.57849				2.71631				328.255				11.77				0.77				3.83				0.83
				116.732				8.03491				2.8799				336.175				10.72				-0.28				3.87				0.87
				122.549				7.8908				2.82825				346.599				11.19				0.19				3.82				0.82
				118.812				7.70811				2.76276				328.249				11.57				0.57				3.89				0.89
				117.073				7.20121				2.58108				302.175				11.69				0.69				3.92				0.92
				123.89				8.18082				2.93219				363.27				11.06				0.06				3.92				0.92
				118.483				7.85532				2.81553				333.593				11.3				0.3				3.81				0.81
				120.144				8.05346				2.88655				346.802				11.59				0.59				3.76				0.76
				119.474				8.26948				2.96397				354.118				11.94				0.94				3.97				0.97
				120.144				8.01885				2.87414				345.311				10.99				-0.01				3.92				0.92
				116.347				8.0409				2.88204				335.316				11.65				0.65				3.87				0.87
				121.163				6.65473				2.38521				288.999				11.6				0.6				3.81				0.81
				117.67				7.47591				2.67954				315.302				11.44				0.44				3.39				0.39
				120.434				7.02462				2.51778				303.226				10.9				-0.1				3.8				0.8
				117.142				7.32842				2.62667				307.693				11.42				0.42				3.79				0.79
				122.15				6.70691				2.40391				293.637				11.52				0.52				3.68				0.68
				120.024				8.7415				3.13315				376.054				11.37				0.37				3.84				0.84
				121.237				8.38752				3.00628				364.471				11.59				0.59				4.03				1.03
				119.213				7.48423				2.68252				319.792				11.57				0.57				3.92				0.92
				120.024				7.31026				2.62016				314.483				11.97				0.97				3.91				0.91
				118.133				8.07496				2.89425				341.908				11.21				0.21				3.84				0.84
				121.09				7.56861				2.71276				328.488				10.97				-0.03				3.62				0.62
				116.732				7.73821				2.77355				323.761				11.46				0.46				3.81				0.81
				121.163				7.31075				2.62034				317.489				11.46				0.46				3.75				0.75
				117.647				8.5277				3.05652				359.591				11.47				0.47				3.86				0.86
				118.601				7.15272				2.5637				304.056				11.46				0.46				3.97				0.97
				119.427				7.74609				2.77638				331.573				11.63				0.63				3.89				0.89
				122.026				7.4396				2.66652				325.384				11.8				0.8				3.76				0.76
				120.87				7.51292				2.6928				325.48				10.86				-0.14				3.78				0.78
				114.526				8.21156				2.94321				337.073				11.15				0.15				3.94				0.94
				121.457				7.8245				2.80448				340.625				11.62				0.62				3.82				0.82
				120.773				7.13395				2.55697				308.813				11.55				0.55				3.79				0.79
				121.556				7.29004				2.61292				317.615				10.82				-0.18				3.86				0.86
				120.072				7.42575				2.66156				319.579				11.05				0.05				3.85				0.85
				117.948				8.18517				2.93375				346.029				11.9				0.9				3.9				0.9
				116.754				7.13394				2.55697				298.537				11.48				0.48				3.9				0.9
				121.359				7.38773				2.64793				321.351				10.81				-0.19				3.83				0.83
				118.064				7.36913				2.64127				311.838				11.54				0.54				3.92				0.92
				121.827				7.13696				2.55805				311.641				11.52				0.52				3.76				0.76
				118.765				7.47584				2.67951				318.232				11.53				0.53				3.9				0.9
				119.784				7.40121				2.65276				317.759				10.93				-0.07				3.86				0.86
				119.071				7.00787				2.51178				299.081				11.85				0.85				3.89				0.89
				117.371				7.45578				2.67232				313.653				12.28				1.28				3.83				0.83
				122.299				7.02949				2.51953				308.137				11.07				0.07				3.8				0.8
				118.483				7.34973				2.63431				312.122				11.09				0.09				3.81				0.81
				119.024				7.14855				2.56221				304.964				11.22				0.22				3.77				0.77
				119.261				6.99202				2.5061				298.879				11.58				0.58				3.75				0.75
				121.237				7.1999				2.58061				312.864				11.15				0.15				3.82				0.82
				119.261				6.57634				2.35711				281.11				10.92				-0.08				3.82				0.82
				122.2				6.77454				2.42815				296.719				11.42				0.42				3.79				0.79
				116.573				7.59964				2.72389				317.531				12.08				1.08				4				1
				123.406				6.97793				2.50105				308.645				11.34				0.34				3.96				0.96
				117.647				8.12726				2.913				342.706				11.12				0.12				3.89				0.89
				118.343				8.11992				2.91036				344.422				11.92				0.92				3.83				0.83
				121.976				7.91108				2.83551				345.864				11.76				0.76				3.77				0.77
				118.18				8.16898				2.92795				346.025				11.69				0.69				4.09				1.09
				118.041				7.51916				2.69504				318.124				11.35				0.35				3.88				0.88
				118.343				7.32414				2.62514				310.668				11.72				0.72				3.58				0.58
				118.624				7.50177				2.68881				318.957				11.75				0.75				3.81				0.81
				121.729				7.19274				2.57804				313.822				11				0				3.88				0.88
				119.904				8.082				2.89677				347.335				11.71				0.71				3.9				0.9
				118.017				8.11797				2.90967				343.391				11.62				0.62				3.83				0.83
				125.078				8.52134				3.05424				382.019				11.84				0.84				3.76				0.76
				114.679				7.82094				2.8032				321.468				10.82				-0.18				3.93				0.93
				120.289				7.30668				2.61888				315.022				11.28				0.28				3.74				0.74
				117.901				7.30316				2.61762				308.621				12.01				1.01				3.91				0.91
				119.57				7.43993				2.66664				318.849				11.28				0.28				3.81				0.81
				124.43				7.66173				2.74614				341.701				11.14				0.14				3.94				0.94
				115.053				7.98138				2.86071				329.132				11.52				0.52				3.9				0.9
				124.172				7.56072				2.70993				336.499				11.7				0.7				3.82				0.82
				116.777				7.65041				2.74208				320.212				11.12				0.12				3.48				0.48
				119.403				7.16316				2.56744				306.56				11.02				0.02				3.81				0.81
				118.483				7.41612				2.65811				314.941				11.23				0.23				3.75				0.75
				120.579				7.49098				2.68494				323.747				11.83				0.83				3.78				0.78
				119.024				7.59521				2.7223				324.019				10.94				-0.06				3.91				0.91
				122.026				7.63363				2.73607				333.87				11.02				0.02				3.85				0.85
				118.718				8.25366				2.9583				351.203				11.39				0.39				3.81				0.81
				120.87				7.87152				2.82133				341.015				11.63				0.63				3.85				0.85
				117.763				7.74853				2.77725				327.056				11.29				0.29				3.89				0.89
				120.409				7.37702				2.64409				318.374				11.13				0.13				3.73				0.73
				118.694				7.4128				2.65692				315.361				11.54				0.54				3.81				0.81
				121.408				7.78931				2.79187				338.956				11.74				0.74				3.83				0.83
				117.555				7.82651				2.8052				329.765				10.88				-0.12				3.89				0.89
				120.409				7.75489				2.77953				334.681				11.12				0.12				3.85				0.85
				116.347				7.91871				2.83825				330.221				11.85				0.85				3.77				0.77
				125.13				7.56448				2.71128				339.264				11.79				0.79				3.89				0.89
				118.227				8.4118				3.01498				356.451				11.55				0.55				3.98				0.98
				117.119				7.64546				2.74031				320.942				11.57				0.57				3.97				0.97
				121.212				7.3389				2.63043				318.84				11.6				0.6				3.83				0.83
				118.812				8.41378				3.01569				358.3				11.64				0.64				3.92				0.92
				119.784				7.83538				2.80838				336.4				11.63				0.63				4.07				1.07
				118.203				8.45072				3.02893				358.03				11.58				0.58				3.88				0.88
				118.343				7.21286				2.58526				305.947				12.16				1.16				3.92				0.92
				118.694				7.22073				2.58808				307.19				11.1				0.1				3.76				0.76
				123.127				7.28913				2.61259				321.682				10.97				-0.03				3.76				0.76
				120.265				8.06068				2.88913				347.46				11.45				0.45				3.72				0.72
				119.261				7.50728				2.69078				320.904				11.63				0.63				3.96				0.96
				119.308				7.28197				2.61003				311.397				11.12				0.12				3.86				0.86
				119.665				8.37032				3.00011				359.008				11.18				0.18				3.78				0.78
				120.024				8.48199				3.04014				364.89				12.17				1.17				4.02				1.02
				118.017				8.06179				2.88953				341.015				11.94				0.94				3.96				0.96
				122.549				6.58018				2.35849				289.03				11.07				0.07				3.73				0.73
								7.73548				2.77257								11.24				0.24				3.8				0.8

## Sheet: Poincare Data
MV 1								MV2								MV3								MV4								MV5										Data Summary
Carestation				FALCON				Carestation				FALCON				Carestation				FALCON				Carestation				FALCON				Carestation				FALCON						SD1 PIP		SD1 PEEP		SD2 PIP		SD2 PEEP
PIP n	PIP n+1	PEEP n	PEEP n+1	PIP n	PIP n+1	PEEP n	PEEP n+1	PIP n	PIP n+1	PEEP n	PEEP n+1	PIP n	PIP n+1	PEEP n	PEEP n+1	PIP n	PIP n+1	PEEP n	PEEP n+1	PIP n	PIP n+1	PEEP n	PEEP n+1	PIP n	PIP n+1	PEEP n	PEEP n+1	PIP n	PIP n+1	PEEP n	PEEP n+1	PIP n	PIP n+1	PEEP n	PEEP n+1	PIP n	PIP n+1	PEEP n	PEEP n+1			Carestation	FALCON	Carestation	FALCON	Carestation	FALCON	Carestation	FALCON
11.39	11.39	2.99	2.96	11.2	11.19	2.98	3.35	11.5	11.58	3.04	3.03	12.1	12.06	3.01	3.08	13.27	13.03	3.1	3.08	12	12.36	3.04	3.13	13.69	13.68	5.19	5.22	14.59	14.53	5.37	5.39	12.77	12.75	3.03	3.05	11.85	11.76	3.46	3.42		MV1	0.03171	0.1022	0.03505	0.1071	0.2417	0.9719	0.2565	0.293
11.39	11.36	2.96	2.94	11.19	11.1	3.35	3.06	11.58	11.62	3.03	3	12.06	12.08	3.08	3.16	13.03	13.31	3.08	3.1	12.36	12.43	3.13	3.12	13.68	13.73	5.22	5.23	14.53	14.31	5.39	5.39	12.75	12.8	3.05	3.04	11.76	11.89	3.42	3.4		MV2	0.06082	0.4348	0.03374	0.5433	0.3465	0.6028	0.3782	0.6636
11.36	11.43	2.94	2.95	11.1	11.25	3.06	3.28	11.62	11.54	3	2.99	12.08	12.13	3.16	3.15	13.31	13.32	3.1	3.13	12.43	12.02	3.12	3.15	13.73	13.73	5.23	5.23	14.31	14.74	5.39	5.19	12.8	12.73	3.04	3.06	11.89	11.76	3.4	3.42		MV3	0.0542	0.2367	0.03584	0.1377	0.286	0.6284	0.4106	0.4184
11.43	11.4	2.95	2.97	11.25	11.2	3.28	3.13	11.54	11.62	2.99	3	12.13	12.1	3.15	3.03	13.32	13.26	3.13	3.15	12.02	12.14	3.15	3.13	13.73	13.72	5.23	5.19	14.74	14.55	5.19	5.28	12.73	12.77	3.06	3.03	11.76	11.87	3.42	3.49		MV4	0.07983	0.2254	0.04336	0.1292	0.2489	0.6553	0.508	1.007
11.4	11.45	2.97	3	11.2	11.26	3.13	3.2	11.62	11.55	3	3.06	12.1	12.17	3.03	3.04	13.26	13.26	3.15	3.18	12.14	11.84	3.13	3.1	13.72	13.69	5.19	5.21	14.55	14.64	5.28	5.25	12.77	12.73	3.03	3.06	11.87	12.03	3.49	3.37		MV5	0.03411	0.5547	0.0247	0.2456	0.2084	0.748	0.3032	0.5399
11.45	11.44	3	2.96	11.26	11.17	3.2	3.06	11.55	11.56	3.06	3.09	12.17	12.11	3.04	3.08	13.26	13.28	3.18	3.19	11.84	12.21	3.1	3.05	13.69	13.69	5.21	5.19	14.64	15.02	5.25	5.25	12.73	12.67	3.06	3.05	12.03	11.96	3.37	3.42
11.44	11.36	2.96	2.96	11.17	11.21	3.06	3.13	11.56	11.57	3.09	3.06	12.11	12.2	3.08	3.09	13.28	13.23	3.19	3.09	12.21	11.78	3.05	3.05	13.69	13.67	5.19	5.18	15.02	14.52	5.25	5.29	12.67	12.6	3.05	3.09	11.96	11.82	3.42	3.42
11.36	11.36	2.96	2.97	11.21	11.32	3.13	3.08	11.57	11.55	3.06	3.06	12.2	12.12	3.09	3.11	13.23	13.1	3.09	3.12	11.78	12.21	3.05	3.06	13.67	13.67	5.18	5.17	14.52	14.27	5.29	5.35	12.6	12.59	3.09	3.1	11.82	12.02	3.42	3.41
11.36	11.34	2.97	2.93	11.32	11.27	3.08	2.99	11.55	11.51	3.06	3.02	12.12	12.11	3.11	3.13	13.1	13.05	3.12	3.14	12.21	12.05	3.06	3.08	13.67	13.64	5.17	5.2	14.27	13.89	5.35	5.19	12.59	12.63	3.1	3.12	12.02	11.92	3.41	3.36
11.34	11.3	2.93	2.94	11.27	11.25	2.99	3.09	11.51	11.45	3.02	2.81	12.11	12.03	3.13	3.19	13.05	13.08	3.14	3.19	12.05	12.06	3.08	3.21	13.64	13.6	5.2	5.18	13.89	13.78	5.19	5.22	12.63	12.68	3.12	3.12	11.92	12.06	3.36	3.44
11.3	11.35	2.94	2.97	11.25	11.23	3.09	3.11	11.45	11.45	2.81	3.02	12.03	12.17	3.19	3.11	13.08	13.14	3.19	3.22	12.06	11.92	3.21	3.06	13.6	13.64	5.18	5.18	13.78	14.15	5.22	5.25	12.68	12.74	3.12	3.13	12.06	11.85	3.44	3.35
11.35	11.36	2.97	2.94	11.23	11.27	3.11	3.22	11.45	11.46	3.02	3.01	12.17	12.14	3.11	3.05	13.14	13.16	3.22	3.15	11.92	11.57	3.06	3.07	13.64	13.67	5.18	5.2	14.15	14.48	5.25	5.24	12.74	12.77	3.13	3.1	11.85	11.62	3.35	3.3
11.36	11.37	2.94	2.96	11.27	11.31	3.22	3.03	11.46	11.48	3.01	3.01	12.14	12.09	3.05	3.04	13.16	13.24	3.15	3.17	11.57	11.85	3.07	3.07	13.67	13.69	5.2	5.22	14.48	14.52	5.24	5.26	12.77	12.81	3.1	3.1	11.62	11.85	3.3	3.54
11.37	11.4	2.96	2.96	11.31	11.35	3.03	3.06	11.48	11.54	3.01	3.03	12.09	12.08	3.04	3	13.24	13.17	3.17	3.21	11.85	11.12	3.07	2.81	13.69	13.72	5.22	5.23	14.52	14.26	5.26	5.14	12.81	12.8	3.1	3.11	11.85	11.85	3.54	3.41
11.4	11.36	2.96	2.94	11.35	11.26	3.06	3.03	11.54	11.5	3.03	3.09	12.08	12.1	3	3.07	13.17	13.23	3.21	3.16	11.12	10.05	2.81	1.24	13.72	13.7	5.23	5.21	14.26	13.95	5.14	4.73	12.8	12.82	3.11	3.09	11.85	11.65	3.41	3.35
11.36	11.39	2.94	2.97	11.26	11.39	3.03	3.23	11.5	11.55	3.09	3.04	12.1	12.15	3.07	3.12	13.23	12.22	3.16	2.36	10.05	11.61	1.24	2.86	13.7	13.69	5.21	5.18	13.95	14.17	4.73	4.6	12.82	12.8	3.09	3.04	11.65	11.86	3.35	3.42
11.39	11.4	2.97	2.96	11.39	11.38	3.23	3.14	11.55	11.5	3.04	3.05	12.15	12.12	3.12	3.1	12.22	13.27	2.36	2.37	11.61	11.7	2.86	3.07	13.69	13.67	5.18	5.17	14.17	14.02	4.6	4.65	12.8	12.76	3.04	3.03	11.86	11.91	3.42	3.51
11.4	11.42	2.96	2.95	11.38	11.2	3.14	3.35	11.5	11.54	3.05	3.01	12.12	12.2	3.1	3.06	13.27	13.16	2.37	2.26	11.7	11.66	3.07	3.14	13.67	13.68	5.17	5.16	14.02	13.94	4.65	4.65	12.76	12.68	3.03	3	11.91	11.79	3.51	3.34
11.42	11.38	2.95	2.97	11.2	11.19	3.35	3.05	11.54	11.52	3.01	3.01	12.2	12.16	3.06	3.04	13.16	13.08	2.26	2.28	11.66	11.48	3.14	3.07	13.68	13.71	5.16	5.19	13.94	14.33	4.65	4.62	12.68	12.74	3	3.02	11.79	11.89	3.34	3.42
11.38	11.38	2.97	2.95	11.19	11.19	3.05	3.1	11.52	11.56	3.01	2.96	12.16	12.06	3.04	3.04	13.08	13.18	2.28	2.27	11.48	12.45	3.07	3.1	13.71	13.65	5.19	5.17	14.33	14.21	4.62	4.64	12.74	12.59	3.02	3.04	11.89	11.9	3.42	3.44
11.38	11.37	2.95	2.96	11.19	11.33	3.1	3.04	11.56	11.47	2.96	2.98	12.06	12.26	3.04	3.09	13.18	13.2	2.27	2.19	12.45	11.84	3.1	3.01	13.65	13.6	5.17	5.16	14.21	13.86	4.64	4.67	12.59	12.64	3.04	3.06	11.9	11.97	3.44	3.49
11.37	11.32	2.96	2.96	11.33	11.26	3.04	3.18	11.47	11.43	2.98	3.05	12.26	12.17	3.09	3.14	13.2	13.25	2.19	2.17	11.84	12.13	3.01	3.12	13.6	13.58	5.16	5.2	13.86	13.08	4.67	4.57	12.64	12.68	3.06	3.06	11.97	11.84	3.49	3.36
11.32	11.28	2.96	2.92	11.26	11.23	3.18	3.22	11.43	11.56	3.05	3.08	12.17	12.05	3.14	3.1	13.25	13.33	2.17	2.23	12.13	11.8	3.12	3.05	13.58	13.64	5.2	5.19	13.08	13.86	4.57	4.67	12.68	12.69	3.06	3.06	11.84	11.8	3.36	3.35
11.28	11.25	2.92	2.94	11.23	11.22	3.22	3.08	11.56	11.4	3.08	3.05	12.05	12.07	3.1	3.01	13.33	13.3	2.23	2.24	11.8	12.13	3.05	3.15	13.64	13.65	5.19	5.21	13.86	14.42	4.67	4.59	12.69	12.71	3.06	3.06	11.8	11.61	3.35	3.37
11.25	11.35	2.94	2.97	11.22	11.33	3.08	3.05	11.4	11.41	3.05	2.99	12.07	12.3	3.01	3.02	13.3	13.26	2.24	2.23	12.13	12.16	3.15	3.13	13.65	13.69	5.21	5.2	14.42	14.47	4.59	4.62	12.71	12.78	3.06	3.03	11.61	11.8	3.37	3.51
11.35	11.35	2.97	2.93	11.33	11.35	3.05	3.17	11.41	11.49	2.99	3.06	12.3	12.04	3.02	3	13.26	13.28	2.23	2.18	12.16	12.4	3.13	3.05	13.69	13.72	5.2	5.2	14.47	14.66	4.62	4.75	12.78	12.75	3.03	3.1	11.8	11.86	3.51	3.43
11.35	11.37	2.93	2.97	11.35	11.33	3.17	3.03	11.49	11.55	3.06	3.05	12.04	12.13	3	3.09	13.28	13.2	2.18	2.22	12.4	12.39	3.05	3.11	13.72	13.72	5.2	5.2	14.66	14.34	4.75	4.65	12.75	12.78	3.1	3.1	11.86	11.95	3.43	3.39
11.37	11.38	2.97	2.94	11.33	11.29	3.03	3.14	11.55	11.51	3.05	3.06	12.13	11.94	3.09	3.16	13.2	13.14	2.22	2.24	12.39	11.88	3.11	3.07	13.72	13.71	5.2	5.17	14.34	14.35	4.65	4.7	12.78	12.74	3.1	3.12	11.95	12.38	3.39	3.34
11.38	11.4	2.94	2.95	11.29	11.21	3.14	3.03	11.51	11.53	3.06	3.14	11.94	11.99	3.16	3.06	13.14	13.09	2.24	2.18	11.88	12.33	3.07	3.03	13.71	13.71	5.17	5.17	14.35	14.18	4.7	4.76	12.74	12.73	3.12	3.12	12.38	12.63	3.34	3.52
11.4	11.38	2.95	2.92	11.21	11.4	3.03	3.19	11.53	11.57	3.14	3.06	11.99	12.12	3.06	3.06	13.09	13.17	2.18	2.22	12.33	12.26	3.03	3.07	13.71	13.7	5.17	5.16	14.18	14.41	4.76	4.65	12.73	12.71	3.12	3.14	12.63	12.63	3.52	3.32
11.38	11.37	2.92	2.96	11.4	11.35	3.19	3.03	11.57	11.51	3.06	3.02	12.12	12.13	3.06	3.06	13.17	13.22	2.22	2.23	12.26	12.22	3.07	3.02	13.7	13.69	5.16	5.17	14.41	14.23	4.65	4.64	12.71	12.69	3.14	3.11	12.63	12.54	3.32	3.33
11.37	11.4	2.96	2.98	11.35	11.29	3.03	3.06	11.51	11.91	3.02	3.31	12.13	12.06	3.06	3.05	13.22	13.28	2.23	2.16	12.22	12.11	3.02	3.04	13.69	13.67	5.17	5.16	14.23	14.16	4.64	4.72	12.69	12.63	3.11	3.12	12.54	12.72	3.33	3.38
11.4	11.33	2.98	2.96	11.29	11.23	3.06	3	11.91	11.37	3.31	2.99	12.06	11.98	3.05	3.13	13.28	13.27	2.16	2.16	12.11	11.86	3.04	3.03	13.67	13.63	5.16	5.17	14.16	14.03	4.72	4.64	12.63	12.68	3.12	3.09	12.72	12.79	3.38	3.48
11.33	11.37	2.96	2.95	11.23	11.38	3	3.09	11.37	11.37	2.99	2.98	11.98	12.15	3.13	3.01	13.27	13.32	2.16	2.22	11.86	12.41	3.03	3.06	13.63	13.59	5.17	5.23	14.03	14.38	4.64	4.62	12.68	12.66	3.09	2.98	12.79	12.4	3.48	3.44
11.37	11.33	2.95	2.96	11.38	11.33	3.09	3.32	11.37	11.42	2.98	3	12.15	12.08	3.01	2.97	13.32	13.26	2.22	2.21	12.41	12.45	3.06	2.94	13.59	13.58	5.23	5.19	14.38	14.29	4.62	4.73	12.66	12.73	2.98	3.01	12.4	12.76	3.44	3.45
11.33	11.28	2.96	2.95	11.33	11.34	3.32	3.05	11.42	11.4	3	3.04	12.08	12	2.97	2.97	13.26	13.24	2.21	2.16	12.45	12.4	2.94	3.08	13.58	13.63	5.19	5.21	14.29	13.79	4.73	4.73	12.73	12.76	3.01	3.01	12.76	12.47	3.45	3.45
11.28	11.32	2.95	2.96	11.34	11.25	3.05	3.47	11.4	11.46	3.04	3.04	12	12.07	2.97	3.04	13.24	13.18	2.16	2.17	12.4	12.3	3.08	3.1	13.63	13.68	5.21	5.18	13.79	13.83	4.73	4.61	12.76	12.78	3.01	3.03	12.47	12.71	3.45	3.48
11.4	11.4	2.99	3.01	11.25	11.31	3.47	3.06	11.46	11.41	3.04	3	12.07	12.11	3.04	3.05	13.18	13.11	2.17	2.19	12.57	12.71	1.42	1.42	13.49	13.46	5.02	5.04	13.83	12.58	4.61	4.68	12.78	12.75	3.03	3.03	12.71	12.7	3.48	3.4
11.4	11.45	3.01	3.01	10.78	10.92	3.16	3.02	11.55	11.55	2.94	2.93	11.25	11.46	2.98	2.95	13.31	13.35	2.13	2.1	12.71	12.58	1.42	1.42	13.46	13.5	5.04	4.97	15.54	15.8	5.27	5.33	12.68	12.68	2.89	3.09	13.23	13.29	3.1	2.95
11.45	11.5	3.01	2.99	10.92	10.94	3.02	3.01	11.55	11.56	2.93	2.93	11.46	11.27	2.95	3.04	13.35	13.39	2.1	2.06	12.58	12.26	1.42	1.46	13.5	13.56	4.97	4.96	15.8	15.81	5.33	5.37	12.68	12.46	3.09	2.97	13.29	13.23	2.95	2.97
11.5	11.47	2.99	3	10.94	10.79	3.01	3.17	11.56	11.45	2.93	2.94	11.27	11.15	3.04	3	13.39	13.36	2.06	2.1	12.26	12.33	1.46	1.55	13.56	13.56	4.96	4.98	15.81	15.56	5.37	5.26	12.46	12.43	2.97	2.97	13.23	12.92	2.97	3.09
11.47	11.47	3	3.02	10.79	10.66	3.17	3.1	11.45	11.42	2.94	2.93	11.15	11.1	3	3.09	13.36	13.34	2.1	2.13	12.33	11.93	1.55	0.84	13.56	13.55	4.98	4.97	15.56	15.62	5.26	5.3	12.43	12.55	2.97	2.98	12.92	13.03	3.09	3.04
11.47	11.5	3.02	3.04	10.66	10.66	3.1	2.94	11.42	11.39	2.93	2.95	11.1	11.31	3.09	3.12	13.34	13.3	2.13	2.1	11.93	12.67	0.84	1.41	13.55	13.59	4.97	5.04	15.62	15.69	5.3	5.27	12.55	12.59	2.98	2.85	13.03	12.88	3.04	2.96
11.5	11.52	3.04	3.02	10.66	10.85	2.94	3.15	11.39	11.41	2.95	2.94	11.31	11.32	3.12	2.92	13.3	13.16	2.1	2.08	12.67	12.87	1.41	1.45	13.59	13.6	5.04	5.02	15.69	15.66	5.27	5.3	12.59	12.64	2.85	2.81	12.88	12.86	2.96	2.94
11.52	11.44	3.02	3.04	10.85	10.62	3.15	3	11.41	11.45	2.94	2.92	11.32	10.87	2.92	2.84	13.16	13.14	2.08	2.13	12.87	12.86	1.45	1.42	13.6	13.55	5.02	4.98	15.66	15.46	5.3	5.3	12.64	12.67	2.81	2.86	12.86	13.32	2.94	2.99
11.44	11.39	3.04	3.01	10.62	10.74	3	2.98	11.45	11.49	2.92	2.91	10.87	10.87	2.84	2.9	13.14	13.22	2.13	2.13	12.86	12.72	1.42	1.53	13.55	13.61	4.98	5.04	15.46	15.67	5.3	5.22	12.67	12.63	2.86	2.84	13.32	13.19	2.99	2.96
11.39	11.47	3.01	2.98	10.74	10.56	2.98	3.01	11.49	11.48	2.91	2.92	10.87	11.25	2.9	2.87	13.22	13.3	2.13	2.05	12.72	12.76	1.53	1.4	13.61	13.56	5.04	5.03	15.67	15.04	5.22	5.31	12.63	12.56	2.84	2.83	13.19	12.94	2.96	2.93
11.47	11.36	2.98	3	10.56	10.89	3.01	2.92	11.48	11.53	2.92	2.91	11.25	11.34	2.87	2.93	13.3	13.35	2.05	2.08	12.76	12.8	1.4	1.42	13.56	13.52	5.03	4.98	15.04	14.95	5.31	5.24	12.56	12.58	2.83	2.84	12.94	13.2	2.93	3
11.36	11.38	3	2.99	10.89	10.81	2.92	3.01	11.53	11.49	2.91	2.93	11.34	11.3	2.93	2.88	13.35	13.36	2.08	2.13	12.8	12.78	1.42	1.37	13.52	13.47	4.98	5.01	14.95	14.62	5.24	5.25	12.58	12.49	2.84	2.88	13.2	12.88	3	2.97
11.38	11.4	2.99	3.02	10.81	10.61	3.01	2.98	11.49	11.53	2.93	2.93	11.3	11.35	2.88	2.95	13.36	13.33	2.13	2.1	12.78	12.7	1.37	1.42	13.47	13.5	5.01	5.03	14.62	14.73	5.25	5.32	12.49	12.48	2.88	2.88	12.88	13.18	2.97	2.94
11.4	11.4	3.02	3.03	10.61	10.59	2.98	3.14	11.53	11.54	2.93	2.93	11.35	11.28	2.95	2.88	13.33	13.34	2.1	2.06	12.7	12.58	1.42	1.49	13.5	13.51	5.03	4.97	14.73	14.56	5.32	5.21	12.48	12.52	2.88	2.91	13.18	13.09	2.94	2.91
11.4	11.43	3.03	3.03	10.59	10.54	3.14	2.96	11.54	11.52	2.93	2.93	11.28	11.32	2.88	2.99	13.34	13.24	2.06	2.09	12.58	12.5	1.49	1.36	13.51	13.55	4.97	4.93	14.56	14.58	5.21	5.31	12.52	12.6	2.91	2.94	13.09	13.07	2.91	3.07
11.43	11.47	3.03	3.06	10.54	10.49	2.96	2.96	11.52	11.47	2.93	2.91	11.32	11.33	2.99	2.75	13.24	13.19	2.09	2.11	12.5	12.5	1.36	1.44	13.55	13.57	4.93	4.94	14.58	14.6	5.31	5.23	12.6	12.62	2.94	2.96	13.07	12.79	3.07	2.91
11.47	11.48	3.06	3.05	10.49	11.13	2.96	3	11.47	11.43	2.91	2.93	11.33	11.31	2.75	2.97	13.19	13.14	2.11	2.15	12.5	12.59	1.44	1.4	13.57	13.58	4.94	4.92	14.6	14.28	5.23	5.29	12.62	12.7	2.96	2.95	12.79	12.78	2.91	2.95
11.48	11.49	3.05	3.01	11.13	10.93	3	2.99	11.43	11.37	2.93	2.94	11.31	11.23	2.97	2.98	13.14	13.21	2.15	2.07	12.59	12.53	1.4	1.38	13.58	13.53	4.92	4.96	14.28	14.42	5.29	5.26	12.7	12.67	2.95	2.95	12.78	12.97	2.95	3.04
11.49	11.53	3.01	3.01	10.93	10.91	2.99	3.17	11.37	11.39	2.94	2.93	11.23	11.39	2.98	2.9	13.21	13.27	2.07	2.09	12.53	12.51	1.38	1.37	13.53	13.57	4.96	4.98	14.42	14.23	5.26	5.18	12.67	12.66	2.95	2.88	12.97	13.1	3.04	2.95
11.53	11.5	3.01	3.01	10.91	11.29	3.17	3.12	11.39	11.43	2.93	2.92	11.39	11.42	2.9	3	13.27	13.3	2.09	2.1	12.51	12.52	1.37	1.36	13.57	13.58	4.98	4.97	14.23	14.02	5.18	5.27	12.66	12.61	2.88	2.84	13.1	12.82	2.95	2.91
11.5	11.49	3.01	3.01	11.29	11	3.12	2.99	11.43	11.48	2.92	2.93	11.42	11.41	3	2.96	13.3	13.32	2.1	2.13	12.52	12.7	1.36	1.38	13.58	13.59	4.97	4.96	14.02	13.94	5.27	5.24	12.61	12.63	2.84	2.85	12.82	12.99	2.91	2.94
11.49	11.51	3.01	3.04	11	11.54	2.99	3.01	11.48	11.47	2.93	2.93	11.41	11.22	2.96	2.31	13.32	13.4	2.13	2.07	12.7	12.61	1.38	1.44	13.59	13.5	4.96	4.98	13.94	13.97	5.24	5.24	12.63	12.6	2.85	2.83	12.99	13.02	2.94	2.98
11.51	11.47	3.04	3.03	11.54	11.52	3.01	3.18	11.47	11.51	2.93	2.93	11.22	11.29	2.31	2.99	13.4	13.36	2.07	2.09	12.61	12.42	1.44	1.45	13.5	13.47	4.98	4.99	13.97	13.94	5.24	5.3	12.6	12.57	2.83	2.85	13.02	13.02	2.98	2.94
11.47	11.43	3.03	2.99	11.52	11.42	3.18	2.96	11.51	11.53	2.93	2.92	11.29	11.42	2.99	3.03	13.36	13.3	2.09	2.12	12.42	12.21	1.45	1.41	13.47	13.43	4.99	5.03	13.94	13.91	5.3	5.19	12.57	12.98	2.85	3.11	13.02	12.75	2.94	2.86
11.43	11.39	2.99	3	11.42	11.52	2.96	3.01	11.53	11.57	2.92	2.92	11.42	11.43	3.03	2.93	13.3	13.25	2.12	2.11	12.21	12.43	1.41	1.39	13.43	13.5	5.03	5.02	13.91	14.15	5.19	5.39	12.98	12.43	3.11	2.93	12.75	13.09	2.86	3.01
11.39	11.36	3	3.02	11.52	11.49	3.01	3.11	11.57	11.55	2.92	2.92	11.43	11.31	2.93	2.97	13.25	13.12	2.11	2.04	12.43	11.95	1.39	1.38	13.5	13.55	5.02	5.01	14.15	14.06	5.39	5.27	12.43	12.44	2.93	2.92	13.09	12.31	3.01	2.95
11.36	11.42	3.02	3.03	11.49	11.3	3.11	3	11.55	11.55	2.92	2.94	11.31	11.3	2.97	3.02	13.12	13.21	2.04	2.08	11.95	12.82	1.38	1.4	13.55	13.56	5.01	4.99	14.06	13.94	5.27	5.27	12.44	12.51	2.92	2.95	12.31	12.75	2.95	2.93
11.42	11.44	3.03	3.04	11.3	11.39	3	3.11	11.55	11.51	2.94	2.94	11.3	11.39	3.02	3.01	13.21	13.26	2.08	2.09	12.82	12.57	1.4	1.39	13.56	13.58	4.99	4.99	13.94	13.94	5.27	5.27	12.51	12.55	2.95	2.91	12.75	13.24	2.93	3.04
11.44	11.46	3.04	3.02	11.39	11.42	3.11	3.22	11.51	11.47	2.94	2.93	11.39	11.41	3.01	2.99	13.26	13.31	2.09	2.11	12.57	12.59	1.39	1.41	13.58	13.58	4.99	5.01	13.94	13.91	5.27	5.22	12.55	12.61	2.91	2.87	13.24	13.26	3.04	2.87
11.46	11.49	3.02	3.03	11.42	11.44	3.22	3	11.47	11.35	2.93	2.93	11.41	11.34	2.99	3.01	13.31	13.27	2.11	2.06	12.59	12.84	1.41	1.4	13.58	13.6	5.01	4.99	13.91	13.76	5.22	5.24	12.61	12.62	2.87	2.85	13.26	13.23	2.87	2.89
11.49	11.45	3.03	3.01	11.44	11.4	3	3.06	11.35	11.41	2.93	2.9	11.34	11.26	3.01	2.98	13.27	13.41	2.06	2.06	12.84	12.68	1.4	1.37	13.6	13.62	4.99	4.98	13.76	13.92	5.24	5.23	12.62	12.65	2.85	2.86	13.23	13.23	2.89	2.94
11.45	11.52	3.01	3.04	11.4	11.49	3.06	3.17	11.41	11.4	2.9	2.91	11.26	11.27	2.98	2.97	13.41	13.34	2.06	2.11	12.68	12.61	1.37	1.41	13.62	13.55	4.98	4.99	13.92	13.94	5.23	5.32	12.65	12.63	2.86	2.83	13.23	13.05	2.94	3
11.52	11.52	3.04	3.05	11.49	11.39	3.17	3.02	11.4	11.42	2.91	2.92	11.27	11.4	2.97	2.96	13.34	13.33	2.11	2.12	12.61	12.64	1.41	1.34	13.55	13.51	4.99	4.95	13.94	14.04	5.32	5.17	12.63	12.62	2.83	2.86	13.05	13.01	3	2.93
11.52	11.52	3.05	3.05	11.39	11.42	3.02	3.06	11.42	11.46	2.92	2.92	11.4	11.44	2.96	1.93	13.33	13.26	2.12	2.07	12.64	12.64	1.34	1.38	13.51	13.56	4.95	4.96	14.04	13.91	5.17	5.22	12.62	12.63	2.86	2.87	13.01	12.84	2.93	2.92
11.52	11.53	3.05	3.03	11.42	11.5	3.06	3.13	11.46	11.48	2.92	2.92	11.44	11.38	1.93	2.95	13.26	13.13	2.07	2.11	12.64	12.5	1.38	1.34	13.56	13.45	4.96	4.96	13.91	13.81	5.22	5.14	12.63	12.53	2.87	2.87	12.84	13.26	2.92	2.94
11.53	11.5	3.03	3.03	11.5	11.52	3.13	3.06	11.48	11.53	2.92	2.93	11.38	11.21	2.95	3	13.13	13.16	2.11	2.1	12.5	12.36	1.34	1.37	13.45	13.48	4.96	4.96	13.81	13.81	5.14	5.31	12.53	12.49	2.87	2.92	13.26	12.37	2.94	2.97
11.5	11.47	3.03	3	11.52	11.65	3.06	3.06	11.53	11.57	2.93	2.94	11.21	11.19	3	2.39	13.16	13.26	2.1	2.03	13.16	13.27	1.29	1.21	13.48	13.5	4.96	4.99	13.81	13.88	5.31	5.19	12.49	12.47	2.92	2.93	12.37	13.14	2.97	2.92
11.47	11.42	3	3.03	11.65	11.66	3.06	2.95	11.57	11.54	2.94	2.92	11.19	11.46	2.39	2.9	13.26	13.26	2.03	2.04	13.27	13.19	1.21	1.28	13.51	13.51	4.89	4.85	13.88	13.86	5.19	5.19	12.47	12.5	2.93	2.91	13.14	12.64	2.92	2.97
11.38	11.37	2.91	2.93	11.66	11.65	3.02	3	11.37	11.32	2.64	2.64	11.96	11.84	2.9	2.91	13.26	13.34	2.04	2.09	13.19	13.25	1.28	1.21	13.51	13.49	4.85	4.84	13.86	14.19	5.19	5.24	12.52	12.48	2.71	2.73	12.64	13.08	2.97	2.98
11.37	11.38	2.93	2.92	11.65	11.59	3	3.16	11.32	11.34	2.64	2.64	11.84	11.81	2.91	3.02	13.23	13.17	1.97	1.97	13.25	13.21	1.21	1.27	13.49	13.44	4.84	4.85	13.84	14.03	5.02	4.89	12.48	12.46	2.73	2.76	13.49	13.42	2.82	2.89
11.38	11.37	2.92	2.9	11.59	11.55	3.16	3.1	11.34	11.39	2.64	2.64	11.81	12	3.02	2.92	13.17	13.31	1.97	2	13.21	13.24	1.27	1.24	13.44	13.37	4.85	4.85	14.03	13.98	4.89	4.96	12.46	12.47	2.76	2.77	13.42	13.47	2.89	2.83
11.37	11.36	2.9	2.9	11.55	11.66	3.1	3.08	11.39	11.28	2.64	2.62	12	11.89	2.92	2.91	13.31	13.26	2	2.02	13.24	13.12	1.24	1.32	13.37	13.4	4.85	4.85	13.98	14.07	4.96	4.94	12.47	12.53	2.77	2.76	13.47	13.54	2.83	2.86
11.36	11.39	2.9	2.9	11.66	11.54	3.08	3.11	11.28	11.32	2.62	2.67	11.89	11.89	2.91	3.01	13.26	13.25	2.02	2.03	13.12	13.05	1.32	1.22	13.4	13.44	4.85	4.88	14.07	13.87	4.94	4.93	12.53	12.53	2.76	2.78	13.54	13.35	2.86	2.92
11.39	11.3	2.9	2.87	11.54	11.59	3.11	3.04	11.32	11.28	2.67	2.68	11.89	11.87	3.01	2.97	13.25	13.17	2.03	2.03	13.05	13.29	1.22	1.28	13.44	13.5	4.88	4.9	13.87	13.83	4.93	5.01	12.53	12.58	2.78	2.74	13.35	13.35	2.92	2.91
11.3	11.32	2.87	2.91	11.59	11.6	3.04	3.08	11.28	11.16	2.68	2.7	11.87	11.85	2.97	2.89	13.17	13.07	2.03	1.96	13.29	13.26	1.28	1.2	13.5	13.51	4.9	4.92	13.83	13.85	5.01	5.04	12.58	12.61	2.74	2.69	13.35	13.44	2.91	2.89
11.32	11.28	2.91	2.93	11.6	11.59	3.08	3.06	11.16	11.12	2.7	2.68	11.85	11.84	2.89	2.93	13.07	13.03	1.96	2	13.26	13.32	1.2	1.26	13.51	13.53	4.92	4.86	13.85	13.95	5.04	4.87	12.61	12.57	2.69	2.67	13.44	13.32	2.89	2.98
11.28	11.26	2.93	2.89	11.59	11.74	3.06	3.06	11.12	11.19	2.68	2.69	11.84	11.86	2.93	2.93	13.03	13.1	2	2	13.32	13.18	1.26	1.23	13.53	13.53	4.86	4.84	13.95	13.9	4.87	4.98	12.57	12.62	2.67	2.68	13.32	13.43	2.98	2.83
11.26	11.32	2.89	2.87	11.74	11.65	3.06	3.1	11.19	11.21	2.69	2.69	11.86	11.82	2.93	2.92	13.1	13.1	2	2.02	13.18	13.39	1.23	1.28	13.53	13.52	4.84	4.84	13.9	13.99	4.98	4.94	12.62	12.61	2.68	2.7	13.43	13.45	2.83	2.83
11.32	11.35	2.87	2.88	11.65	11.49	3.1	3.12	11.21	11.28	2.69	2.7	11.82	11.61	2.92	2.93	13.1	13.15	2.02	1.98	13.39	13.09	1.28	1.23	13.52	13.56	4.84	4.82	13.99	14.04	4.94	5.01	12.61	12.58	2.7	2.69	13.45	13.45	2.83	2.85
11.35	11.36	2.88	2.91	11.49	11.46	3.12	3.16	11.28	11.28	2.7	2.7	11.61	11.76	2.93	2.79	13.15	13.22	1.98	2	13.09	13.14	1.23	1.3	13.56	13.45	4.82	4.84	14.04	13.92	5.01	4.96	12.58	12.48	2.69	2.69	13.45	13.52	2.85	2.93
11.36	11.42	2.91	2.92	11.46	11.72	3.16	3.1	11.28	11.25	2.7	2.68	11.76	11.84	2.79	3.3	13.22	13.22	2	2.02	13.14	13.13	1.3	1.23	13.45	13.43	4.84	4.88	13.92	14	4.96	5.05	12.48	12.5	2.69	2.73	13.52	13.4	2.93	2.83
11.42	11.39	2.92	2.89	11.72	11.65	3.1	3.08	11.25	11.27	2.68	2.66	11.84	11.76	3.3	2.89	13.22	13.24	2.02	1.99	13.13	13.1	1.23	1.3	13.43	13.38	4.88	4.89	14	9.14	5.05	3.14	12.5	12.54	2.73	2.81	13.4	13.46	2.83	2.95
11.39	11.36	2.89	2.88	11.65	11.66	3.08	3.02	11.27	11.35	2.66	2.66	11.76	11.64	2.89	2.9	13.24	13.2	1.99	2.02	13.1	13.08	1.3	1.24	13.38	13.38	4.89	4.91	9.14	14.02	3.14	4	12.54	12.49	2.81	2.8	13.46	13.53	2.95	2.94
11.36	11.4	2.88	2.89	11.66	11.69	3.02	3.11	11.35	11.32	2.66	2.66	11.64	11.82	2.9	2.89	13.2	13.13	2.02	1.96	13.08	13.15	1.24	1.3	13.38	13.46	4.91	4.86	14.02	14.13	4	5.06	12.49	12.47	2.8	2.77	13.53	13.41	2.94	2.86
11.4	11.4	2.89	2.9	11.69	11.6	3.11	3.01	11.32	11.33	2.66	2.64	11.82	11.88	2.89	2.89	13.13	13.05	1.96	1.98	13.15	13.15	1.3	1.23	13.46	13.5	4.86	4.85	14.13	14.05	5.06	4.98	12.47	12.58	2.77	2.65	13.41	13.48	2.86	2.92
11.4	11.39	2.9	2.94	11.6	11.73	3.01	3.02	11.33	11.32	2.64	2.6	11.88	11.83	2.89	2.95	13.05	13.01	1.98	2	13.15	13.19	1.23	1.29	13.5	13.51	4.85	4.85	14.05	14.08	4.98	5.12	12.58	12.56	2.65	2.65	13.48	13.65	2.92	2.87
11.39	11.35	2.94	2.91	11.73	11.7	3.02	3.14	11.32	11.27	2.6	2.59	11.83	11.78	2.95	2.87	13.01	13.09	2	2.02	13.19	13.14	1.29	1.2	13.51	13.52	4.85	4.85	14.08	13.95	5.12	4.98	12.56	12.58	2.65	2.63	13.65	13.5	2.87	2.78
11.35	11.34	2.91	2.87	11.7	11.57	3.14	3.14	11.27	11.28	2.59	2.6	11.78	11.62	2.87	2.98	13.09	13.12	2.02	2.04	13.14	13.14	1.2	1.28	13.52	13.47	4.85	4.81	13.95	14.04	4.98	5.06	12.58	12.58	2.63	2.67	13.5	13.49	2.78	2.84
11.34	11.29	2.87	2.99	11.57	11.58	3.14	3.03	11.28	11.26	2.6	2.6	11.62	11.82	2.98	2.94	13.12	13.17	2.04	1.98	13.14	12.83	1.28	1.19	13.47	13.52	4.81	4.89	14.04	14.06	5.06	4.98	12.58	12.63	2.67	2.66	13.49	13.38	2.84	2.94
11.29	11.24	2.99	2.88	11.58	11.7	3.03	3.17	11.26	11.14	2.6	2.63	11.82	11.82	2.94	2.91	13.17	13.17	1.98	1.96	12.83	13.05	1.19	1.29	13.52	13.53	4.89	4.92	14.06	14.09	4.98	5.03	12.63	12.58	2.66	2.7	13.38	13.64	2.94	2.9
11.24	11.26	2.88	2.91	11.7	11.65	3.17	3.03	11.14	11.17	2.63	2.62	11.82	11.96	2.91	3.02	13.17	13.24	1.96	2	13.05	13.25	1.29	1.21	13.53	13.51	4.92	4.87	14.09	14.06	5.03	4.91	12.58	12.59	2.7	2.67	13.64	13.52	2.9	2.82
11.26	11.3	2.91	2.85	11.65	11.63	3.03	3.28	11.17	11.19	2.62	2.62	11.96	11.77	3.02	2.88	13.24	13.21	2	2	13.25	13.17	1.21	1.26	13.51	13.51	4.87	4.84	14.06	14.12	4.91	5.1	12.59	12.52	2.67	2.73	13.52	13.31	2.82	2.82
11.3	11.35	2.85	2.89	11.63	11.66	3.28	3.09	11.19	11.22	2.62	2.62	11.77	11.83	2.88	2.87	13.21	13.24	2	1.95	13.17	13.21	1.26	1.22	13.51	13.44	4.84	4.85	14.12	13.93	5.1	4.93	12.52	12.5	2.73	2.73	13.31	13.37	2.82	2.83
11.35	11.35	2.89	2.93	11.66	11.79	3.09	3.02	11.22	11.3	2.62	2.62	11.83	11.82	2.87	2.84	13.24	13.14	1.95	1.99	13.21	13.2	1.22	1.27	13.44	13.36	4.85	4.89	13.93	14.02	4.93	5.03	12.5	12.46	2.73	2.76	13.37	13.46	2.83	2.87
11.35	11.45	2.93	2.91	11.79	11.67	3.02	3.13	11.3	11.34	2.62	2.62	11.82	11.86	2.84	1.04	13.14	13.07	1.99	2	13.2	13.11	1.27	1.18	13.36	13.4	4.89	4.89	14.02	13.84	5.03	5.04	12.46	12.45	2.76	2.76	13.46	13.48	2.87	2.99
11.45	11.38	2.91	2.89	11.67	11.7	3.13	3.03	11.34	11.32	2.62	2.63	11.86	11.82	1.04	1.03	13.07	13.05	2	2.02	13.11	13.1	1.18	1.28	13.4	13.46	4.89	4.9	13.84	13.87	5.04	5.09	12.45	12.45	2.76	2.74	13.48	13.41	2.99	2.89
11.38	11.37	2.89	2.86	11.7	11.66	3.03	3.12	11.32	11.33	2.63	2.62	11.82	11.95	1.03	2.89	13.05	13.01	2.02	1.95	13.1	13.11	1.28	1.21	13.46	13.49	4.9	4.91	13.87	13.93	5.09	4.96	12.45	12.54	2.74	2.63	13.41	13.35	2.89	2.81
11.37	11.37	2.86	2.86	11.66	11.55	3.12	3.14	11.33	11.32	2.62	2.63	11.95	11.89	2.89	2.94	13.01	13.1	1.95	1.96	13.11	13.12	1.21	1.24	13.49	13.5	4.91	4.93	13.93	13.94	4.96	5	12.54	12.55	2.63	2.66	13.35	13.67	2.81	2.82
11.37	11.39	2.86	2.91	11.55	11.7	3.14	3.03	11.32	11.34	2.63	2.63	11.89	11.84	2.94	2.85	13.1	13.19	1.96	2	13.12	12.98	1.24	1.19	13.5	13.51	4.93	4.88	13.94	13.9	5	4.94	12.55	12.58	2.66	2.69	13.67	13.41	2.82	2.84
11.39	11.36	2.91	2.9	11.7	11.69	3.03	3.11	11.34	11.28	2.63	2.66	11.84	11.68	2.85	0.96	13.19	13.23	2	2	12.98	13.09	1.19	1.25	13.51	13.55	4.88	4.86	13.9	13.9	4.94	5.07	12.58	12.57	2.69	2.69	13.41	13.59	2.84	2.95
11.36	11.3	2.9	2.84	11.69	11.65	3.11	3.15	11.28	11.29	2.66	2.67	11.68	11.82	0.96	2.88	13.23	13.2	2	1.99	13.09	13.12	1.25	1.19	13.55	13.56	4.86	4.86	13.9	13.8	5.07	5.06	12.57	12.62	2.69	2.68	13.59	13.31	2.95	2.92
11.3	11.31	2.84	2.87	11.65	11.56	3.15	3.08	11.29	11.27	2.67	2.65	11.82	11.78	2.88	2.95	13.2	13.27	1.99	1.94	13.12	13.2	1.19	1.22	13.56	13.51	4.86	4.84	13.8	13.97	5.06	5.07	12.62	12.56	2.68	2.71	13.31	13.45	2.92	2.95
11.31	11.24	2.87	2.88	11.56	11.62	3.08	3.13	11.27	11.16	2.65	2.66	11.78	11.87	2.95	3.01	13.27	13.18	1.94	1.94	13.2	13	1.22	1.17	13.51	13.47	4.84	4.88	13.97	13.78	5.07	4.96	12.56	12.59	2.71	2.73	13.45	13.51	2.95	2.85
11.24	11.26	2.88	2.89	11.62	11.73	3.13	3.28	11.16	11.12	2.66	2.66	11.85	11.82	2.94	2.88	13.18	13.19	1.94	1.98	13	13.07	1.17	1.23	13.47	13.54	4.88	4.91	13.78	13.8	4.96	5.02	12.59	12.57	2.73	2.73	13.51	13.53	2.85	2.8
11.26	11.28	2.89	2.89	11.73	11.65	3.28	3.16	11.12	11.15	2.66	2.66	11.82	11.72	2.88	2.86	13.19	13.14	1.98	2.03	13.19	13.16	1.09	1.03	13.48	13.52	4.89	4.87	13.8	13.89	5.02	4.94	12.57	12.5	2.73	2.72	13.53	13.49	2.8	2.79
11.28	11.3	2.89	2.86	11.65	11.61	3.16	3.12	11.15	11.17	2.66	2.68	11.72	11.86	2.86	2.98	13.14	13.03	2.03	2.01	13.16	13.27	1.03	1.13	13.52	13.52	4.87	4.87	13.89	12.51	4.94	5.06	12.5	12.45	2.72	2.62	13.49	13.47	2.79	2.87
11.07	11.11	2.71	2.68	11.29	11.36	2.94	3.08	11.18	11.16	2.58	2.6	11.86	11.81	2.98	2.95	12.93	12.87	1.81	1.85	13.27	13.23	1.13	1.07	13.52	13.52	4.87	4.89	14.02	14.16	4.93	4.64	12.52	12.45	2.55	2.57	13.47	13.54	2.87	2.89
11.11	11.12	2.68	2.67	11.36	11.19	3.08	2.96	11.16	11.22	2.6	2.64	11.81	11.74	2.95	2.97	12.87	12.89	1.85	1.86	13.23	13.18	1.07	1.11	13.52	13.53	4.89	4.91	14.16	14.04	4.64	4.37	12.45	12.43	2.57	2.6	12.97	12.97	3.04	2.84
11.12	11.16	2.67	2.7	11.19	11.2	2.96	2.95	11.22	11.27	2.64	2.67	11.74	11.63	2.97	1.08	12.89	12.96	1.86	1.78	13.18	13.1	1.11	1.07	13.53	13.57	4.91	4.95	14.04	13.97	4.37	4.25	12.43	12.44	2.6	2.63	12.97	12.58	2.84	3
11.16	11.15	2.7	2.7	11.2	11.41	2.95	3.01	11.27	11.27	2.67	2.62	11.63	11.84	1.08	0.89	12.96	12.98	1.78	1.79	13.1	13.38	1.07	1.07	13.57	13.59	4.95	4.87	13.97	13.89	4.25	4.55	12.44	12.36	2.63	2.64	12.58	12	3	2.9
11.15	11.18	2.7	2.65	11.41	11.33	3.01	3.01	11.27	11.33	2.62	2.6	11.84	11.98	0.89	2.84	12.98	13.09	1.79	1.81	13.38	13.24	1.07	1.06	13.59	13.53	4.87	4.87	13.89	13.89	4.55	4.32	12.36	12.36	2.64	2.53	12	12.84	2.9	2.82
11.18	11.19	2.65	2.69	11.33	11.34	3.01	3.29	11.33	11.33	2.6	2.6	11.98	11.87	2.84	2.88	13.09	13.09	1.81	1.82	13.24	13.14	1.06	1.09	13.53	13.43	4.87	4.88	13.89	13.96	4.32	4.43	12.36	12.31	2.53	2.54	12.84	12.79	2.82	2.87
11.19	11.24	2.69	2.67	11.34	11.3	3.29	2.92	11.33	11.31	2.6	2.63	11.87	11.95	2.88	2.91	13.09	13.1	1.82	1.82	13.14	13.34	1.09	1.05	13.43	13.36	4.88	4.92	13.96	13.93	4.43	4.82	12.31	12.3	2.54	2.55	12.79	12.82	2.87	2.89
11.24	11.22	2.67	2.71	11.3	11.21	2.92	3.08	11.31	11.37	2.63	2.65	11.95	12.03	2.91	2.72	13.1	13.05	1.82	1.84	13.34	13.28	1.05	1.04	13.36	13.38	4.92	4.94	13.93	13.85	4.82	4.62	12.3	12.4	2.55	2.6	12.82	12.93	2.89	2.82
11.22	11.23	2.71	2.71	11.21	11.43	3.08	3.09	11.37	11.39	2.65	2.67	12.03	11.86	2.72	2.91	13.05	13.02	1.84	1.77	13.28	13.45	1.04	1.04	13.38	13.47	4.94	4.87	13.85	14.01	4.62	4.38	12.4	12.44	2.6	2.61	12.93	12.88	2.82	2.9
11.23	11.15	2.71	2.71	11.43	11.44	3.09	2.97	11.39	11.31	2.67	2.59	11.86	11.87	2.91	2.85	13.02	12.95	1.77	1.79	13.45	13.2	1.04	1.02	13.47	13.52	4.87	4.87	14.01	14	4.38	4.4	12.44	12.47	2.61	2.64	12.88	12.76	2.9	2.85
11.15	11.14	2.71	2.68	11.44	11.37	2.97	3	11.31	11.31	2.59	2.59	11.87	11.84	2.85	1	12.95	12.84	1.79	1.82	13.2	13.21	1.02	1.06	13.52	13.53	4.87	4.89	14	13.9	4.4	4.61	12.47	12.46	2.64	2.58	12.76	12.86	2.85	3.03
11.14	11.09	2.68	2.69	11.37	11.33	3	2.98	11.31	11.31	2.59	2.61	11.84	12.01	1	2.84	12.84	12.88	1.82	1.82	13.21	13.33	1.06	1.04	13.53	13.55	4.89	4.91	13.9	14.05	4.61	4.61	12.46	12.52	2.58	2.54	12.86	12.92	3.03	2.92
11.09	11.04	2.69	2.66	11.33	11.47	2.98	2.93	11.31	11.19	2.61	2.65	12.01	11.64	2.84	0.94	12.88	12.97	1.82	1.82	13.33	13.28	1.04	1.12	13.55	13.54	4.91	4.9	14.05	13.9	4.61	4.57	12.52	12.48	2.54	2.57	12.92	12.9	2.92	1.91
11.04	11.11	2.66	2.71	11.47	11.47	2.93	3.01	11.19	11.19	2.65	2.69	11.64	11.92	0.94	2.85	12.97	13	1.82	1.77	13.28	13.25	1.12	1.05	13.54	13.6	4.9	4.87	13.9	13.82	4.57	4.6	12.48	12.45	2.57	2.62	12.9	12.73	1.91	0.59
11.11	11.11	2.71	2.71	11.47	11.31	3.01	3.28	11.19	11.16	2.69	2.61	11.92	11.66	2.85	1.19	13	13.08	1.77	1.77	13.25	13.32	1.05	1.02	13.6	13.54	4.87	4.86	13.82	13.89	4.6	4.14	12.45	12.46	2.62	2.62	12.73	12.99	0.59	2.92
11.11	11.15	2.71	2.67	11.31	11.35	3.28	2.98	11.16	11.17	2.61	2.59	11.66	11.87	1.19	2.95	13.08	13.07	1.77	1.79	13.32	13.08	1.02	0.2	13.54	13.5	4.86	4.89	13.89	13.96	4.14	4.68	12.46	12.42	2.62	2.52	12.99	12.94	2.92	2.98
11.15	11.16	2.67	2.67	11.35	11.47	2.98	3.09	11.17	11.21	2.59	2.61	11.87	11.84	2.95	2.89	13.07	13.06	1.79	1.82	13.08	13.32	0.2	1.06	13.5	13.41	4.89	4.89	13.96	13.88	4.68	4.68	12.42	12.29	2.52	2.54	12.94	13.01	2.98	2.92
11.16	11.14	2.67	2.7	11.47	11.35	3.09	3.22	11.21	11.26	2.61	2.63	11.84	11.8	2.89	3.07	13.06	13.15	1.82	1.84	13.32	13.34	1.06	1.09	13.41	13.39	4.89	4.93	13.88	13.91	4.68	4.67	12.29	12.3	2.54	2.61	13.01	12.98	2.92	3.01
11.14	11.2	2.7	2.72	11.35	11.4	3.22	2.96	11.26	11.29	2.63	2.65	11.8	11.85	3.07	3.02	13.15	13.01	1.84	1.81	13.34	13.24	1.09	1.12	13.39	13.44	4.93	4.91	13.91	13.94	4.67	4.46	12.3	12.39	2.61	2.57	12.98	12.96	3.01	3.07
11.2	11.22	2.72	2.84	11.4	11.31	2.96	3.02	11.29	11.33	2.65	2.67	11.85	11.86	3.02	2.91	13.01	12.92	1.81	1.77	13.24	13.29	1.12	1.03	13.44	13.51	4.91	4.84	13.94	14.05	4.46	4.43	12.39	12.4	2.57	2.55	12.96	12.6	3.07	3
11.22	11.28	2.84	2.72	11.31	11.34	3.02	2.93	11.33	11.32	2.67	2.62	11.86	10.49	2.91	2	12.92	12.84	1.77	1.79	13.29	13.2	1.03	1.11	13.51	13.49	4.84	4.89	14.05	13.97	4.43	4.56	12.4	12.43	2.55	2.57	12.6	12.85	3	2.72
11.28	11.19	2.72	2.71	11.34	11.38	2.93	3.1	11.32	11.34	2.62	2.58	10.49	11.83	2	2.68	12.84	12.88	1.79	1.82	13.2	13.41	1.11	1.02	13.49	13.52	4.89	4.88	13.97	14.16	4.56	4.59	12.43	12.47	2.57	2.61	12.85	12.7	2.72	2.99
11.19	11.21	2.71	2.74	11.38	11.26	3.1	2.99	11.34	11.31	2.58	2.61	11.83	11.93	2.68	3.02	12.88	12.91	1.82	1.82	13.41	13.33	1.02	1.09	13.52	13.51	4.88	4.94	14.16	13.98	4.59	4.68	12.47	12.48	2.61	2.54	12.7	12.95	2.99	2.97
11.21	11.19	2.74	2.71	11.26	10.96	2.99	3.04	11.31	11.36	2.61	2.65	11.93	11.86	3.02	2.89	12.91	13.05	1.82	1.83	13.33	13.33	1.09	1.05	13.51	13.55	4.94	4.94	13.98	14.28	4.68	4.52	12.48	12.49	2.54	2.59	12.95	13.18	2.97	2.88
11.19	11.14	2.71	2.69	10.96	11.21	3.04	3.13	11.36	11.3	2.65	2.66	11.86	11.8	2.89	3.01	13.05	13.04	1.83	1.77	13.33	13.19	1.05	1.09	13.55	13.55	4.94	4.86	14.28	14.3	4.52	4.41	12.49	12.56	2.59	2.61	13.18	13.12	2.88	2.94
11.14	11.14	2.69	2.72	11.21	11.49	3.13	2.99	11.3	11.33	2.66	2.62	11.8	11.84	3.01	2.86	13.04	13.07	1.77	1.78	13.19	13.19	1.09	1.07	13.55	13.54	4.86	4.87	14.3	14.12	4.41	4.81	12.56	12.45	2.61	2.59	13.12	13.11	2.94	2.93
11.14	11.11	2.72	2.68	11.49	11.29	2.99	2.97	11.33	11.23	2.62	2.58	11.84	11.79	2.86	2.88	13.07	13.1	1.78	1.8	13.19	13.06	1.07	1.13	13.54	13.48	4.87	4.92	14.12	14.07	4.81	4.56	12.45	12.47	2.59	2.57	13.11	13.21	2.93	2.8
11.11	11.12	2.68	2.65	11.29	11.27	2.97	2.98	11.23	11.26	2.58	2.59	11.79	11.82	2.88	2.87	13.1	13.06	1.8	1.81	13.06	13.29	1.13	1.07	13.48	13.45	4.92	4.93	14.07	14.07	4.56	4.45	12.47	12.42	2.57	2.62	13.21	13.13	2.8	2.96
11.12	11.13	2.65	2.73	11.27	11.34	2.98	2.99	11.26	11.18	2.59	2.62	11.82	11.89	2.87	2.88	13.06	13.04	1.81	1.81	13.29	13.38	1.07	1.08	13.45	13.36	4.93	4.88	14.07	14.09	4.45	4.44	12.42	12.35	2.62	2.59	13.13	12.97	2.96	2.95
11.13	11.17	2.73	2.7	11.34	11.35	2.99	2.94	11.18	11.13	2.62	2.64	11.89	11.69	2.88	2.84	13.04	13	1.81	1.78	13.38	13.34	1.08	1.24	13.36	13.44	4.88	4.89	14.09	14.09	4.44	4.33	12.35	12.28	2.59	2.55	12.97	13.03	2.95	2.95
11.17	11.21	2.7	2.67	11.35	11.23	2.94	2.99	11.13	11.21	2.64	2.66	11.69	11.66	2.84	2.49	13	12.81	1.78	1.78	13.34	13.31	1.24	0.98	13.44	13.47	4.89	4.9	14.09	14.04	4.33	4.67	12.28	12.4	2.55	2.6	13.03	12.92	2.95	2.96
11.21	11.25	2.67	2.73	11.23	11.31	2.99	3.01	11.21	11.24	2.66	2.58	11.84	11.81	2.85	2.93	12.81	12.88	1.78	1.8	13.31	13.27	0.98	1.11	13.47	13.51	4.9	4.94	14.04	14.14	4.67	4.82	12.4	12.39	2.6	2.55	12.92	13.08	2.96	2.76
11.25	11.21	2.73	2.71	11.31	11.17	3.01	2.92	11.24	11.78	2.58	2.69	11.81	11.64	2.93	2.85	12.88	12.94	1.8	1.79	13.27	13.31	1.11	1.06	13.51	13.55	4.94	4.88	14.14	14.14	4.82	4.68	12.39	12.44	2.55	2.57	13.08	12.98	2.76	2.91
11.21	11.19	2.71	2.72	11.17	11.39	2.92	3.05	11.78	11.08	2.69	2.62	11.64	11.78	2.85	2.94	12.94	12.97	1.79	1.83	13.31	13.19	1.06	1.13	13.55	13.55	4.88	4.83	14.14	14.09	4.68	4.57	12.44	12.51	2.57	2.6	12.98	12.93	2.91	2.9
11.19	11.2	2.72	2.7	11.39	11.32	3.05	2.98	11.08	11.04	2.62	2.65	11.78	11.92	2.94	2.93	12.97	13.02	1.83	1.84	13.19	13.3	1.13	1.07	13.55	13.52	4.83	4.85	14.09	14.01	4.57	4.44	12.51	12.48	2.6	2.56	12.93	13.12	2.9	2.74
11.2	11.21	2.7	2.66	11.32	11.3	2.98	2.96	11.04	11.03	2.65	2.65	11.92	11.74	2.93	2.85	13.02	13.08	1.84	1.76	12.87	12.92	1.03	0.99	13.52	13.59	4.85	4.88	14.01	14.06	4.44	4.48	12.48	12.49	2.56	2.56	13.12	13.21	2.74	2.94
11.21	11.08	2.66	2.71	11.3	11.36	2.96	3.05	11.03	11.09	2.65	2.68	11.74	11.75	2.85	2.89	13.08	13.05	1.76	1.78	12.92	12.88	0.99	1.01	13.54	13.54	4.77	4.82	14.06	13.91	4.48	4.53	12.49	12.51	2.56	2.59	13.21	13.13	2.94	2.99
11.08	11.11	2.71	2.66	11.36	11.22	3.05	2.95	11.13	11.06	2.46	2.47	11.75	11.65	2.89	1.01	13.05	12.97	1.74	1.76	12.88	12.8	1.01	0.98	13.54	13.48	4.82	4.8	13.6	13.94	3.51	5.04	12.51	12.44	2.59	2.64	13.13	13.11	2.99	2.85
11.15	11.1	2.69	2.68	9.86	9.91	2.49	2.58	11.06	11.01	2.47	2.51	11.65	11.8	1.01	2.77	12.97	12.87	1.76	1.76	12.8	12.88	0.98	1.1	13.48	13.41	4.8	4.76	13.94	14.01	5.04	4.57	12.3	12.26	2.44	2.46	13.1	12.98	2.63	2.62
11.1	11.07	2.68	2.68	9.91	9.97	2.58	2.82	11.01	10.95	2.51	2.54	11.8	11.77	2.77	1.66	12.87	12.88	1.76	1.78	12.88	13.08	1.1	1.02	13.41	13.36	4.76	4.75	14.01	14.15	4.57	5.35	12.26	12.29	2.46	2.51	12.98	12.97	2.62	2.61
11.07	11.13	2.68	2.7	9.97	9.62	2.82	2.51	10.95	10.99	2.54	2.48	11.77	11.72	1.66	2.88	12.88	12.88	1.78	1.78	13.08	13.01	1.02	1	13.36	13.4	4.75	4.82	14.15	14.02	5.35	4.93	12.29	12.36	2.51	2.54	12.97	9.8	2.61	2.38
11.13	11.15	2.7	2.62	9.62	9.53	2.51	2.62	10.99	11.11	2.48	2.45	11.72	11.56	2.88	1.44	12.88	12.96	1.78	1.8	13.01	13.08	1	1.04	13.4	13.44	4.82	4.79	14.02	14.06	4.93	4.74	12.36	12.43	2.54	2.43	9.8	12.9	2.38	2.47
11.15	11.16	2.62	2.66	9.53	9.62	2.62	2.61	11.11	11.03	2.45	2.47	11.56	11.76	1.44	2.85	12.96	13.01	1.8	1.71	13.08	12.99	1.04	1.01	13.44	13.5	4.79	4.76	14.06	14.08	4.74	5.34	12.43	12.38	2.43	2.48	12.9	12.94	2.47	2.65
11.16	11.19	2.66	2.7	9.62	9.52	2.61	2.71	11.03	11.09	2.47	2.52	11.76	11.72	2.85	2.75	13.01	13.04	1.71	1.73	12.99	12.83	1.01	0.96	13.5	13.51	4.76	4.81	14.08	13.94	5.34	5.09	12.38	12.44	2.48	2.51	12.94	12.93	2.65	2.66
11.19	11.2	2.7	2.66	9.52	9.52	2.71	2.58	11.09	11.15	2.52	2.55	11.72	11.68	2.75	2.79	13.04	13.05	1.73	1.75	12.83	13.04	0.96	1.01	13.51	13.51	4.81	4.83	13.94	14.11	5.09	4.73	12.44	12.44	2.51	2.52	12.93	12.97	2.66	2.67
11.2	11.2	2.66	2.72	9.52	9.86	2.58	2.73	11.15	11.15	2.55	2.49	11.68	11.79	2.79	2.8	13.05	13.1	1.75	1.76	13.04	12.75	1.01	0.99	13.51	13.55	4.83	4.75	14.11	14.02	4.73	5.08	12.44	12.4	2.52	2.42	12.97	13.02	2.67	2.72
11.2	11.24	2.72	2.66	9.86	9.85	2.73	2.68	11.15	11.21	2.49	2.46	11.79	11.71	2.8	2.86	13.1	13.04	1.76	1.78	12.75	12.87	0.99	1.05	13.55	13.47	4.75	4.74	14.02	14.1	5.08	5.38	12.4	12.36	2.42	2.43	13.02	12.95	2.72	2.71
11.24	11.18	2.66	2.69	9.85	9.63	2.68	2.65	11.21	11.15	2.46	2.46	11.71	11.61	2.86	2.04	13.04	13.01	1.78	1.77	12.87	11.56	1.05	1.02	13.47	13.46	4.74	4.81	14.1	14.11	5.38	5.24	12.36	12.34	2.43	2.49	12.95	12.97	2.71	2.71
11.18	11.2	2.69	2.7	9.63	9.62	2.65	2.57	11.15	11.14	2.46	2.53	11.61	11.65	2.04	2.95	13.01	12.93	1.77	1.79	11.56	12.83	1.02	0.99	13.46	13.45	4.81	4.75	14.11	14.07	5.24	5.03	12.34	12.2	2.49	2.52	12.97	12.86	2.71	2.75
11.2	11.2	2.7	2.65	9.62	9.5	2.57	2.69	11.14	11.14	2.53	2.5	11.65	11.61	2.95	2.87	12.93	12.81	1.79	1.78	12.83	12.28	0.99	1.01	13.45	13.32	4.75	4.76	14.07	14.13	5.03	4.78	12.2	12.25	2.52	2.44	12.86	12.87	2.75	2.72
11.2	11.18	2.65	2.72	9.5	9.4	2.69	2.52	11.14	11.02	2.5	2.45	11.61	11.64	2.87	2.93	12.81	12.83	1.78	1.76	12.28	12.92	1.01	0.97	13.32	13.36	4.76	4.76	14.13	14.07	4.78	5.31	12.25	12.27	2.44	2.43	12.87	12.96	2.72	2.75
11.18	11.17	2.72	2.68	9.4	9.62	2.52	2.54	11.02	10.99	2.45	2.46	11.64	11.69	2.93	2.94	12.83	12.9	1.76	1.75	12.92	13.05	0.97	1.04	13.36	13.43	4.76	4.81	14.07	14.02	5.31	5.11	12.27	12.33	2.43	2.48	12.96	13.1	2.75	2.76
11.17	11.07	2.68	2.71	9.62	9.83	2.54	2.62	10.99	11.03	2.46	2.48	11.69	11.63	2.94	2.86	12.9	12.96	1.75	1.77	13.05	12.93	1.04	0.99	13.43	13.43	4.81	4.75	14.02	14.18	5.11	5.21	12.33	12.38	2.48	2.49	13.1	12.83	2.76	2.72
11.07	11.1	2.71	2.65	9.83	10.5	2.62	2.54	11.03	11.07	2.48	2.52	11.63	11.56	2.86	1.95	12.96	13	1.77	1.76	12.93	13.03	0.99	0.96	13.43	13.48	4.75	4.74	14.18	14.04	5.21	5.38	12.38	12.43	2.49	2.41	12.83	13	2.72	2.64
11.1	11.11	2.65	2.64	10.5	10.02	2.54	2.72	11.07	11.15	2.52	2.54	11.56	11.64	1.95	2.88	13	13.06	1.76	1.79	13.03	13.28	0.96	1	13.48	13.52	4.74	4.77	14.04	14.16	5.38	5.23	12.43	12.38	2.41	2.43	13	12.96	2.64	2.62
11.11	11.16	2.64	2.69	10.02	9.76	2.72	2.62	11.15	11.11	2.54	2.47	11.64	11.81	2.88	2.83	13.06	13.12	1.79	1.78	13.28	13.08	1	0.96	13.52	13.49	4.77	4.79	14.16	14.04	5.23	4.81	12.38	12.39	2.43	2.44	12.96	13.05	2.62	2.61
11.16	11.19	2.69	2.68	9.76	9.69	2.62	2.63	11.11	11.13	2.47	2.46	11.81	11.63	2.83	2.9	13.12	13.04	1.78	1.78	13.08	13.05	0.96	1.03	13.49	13.48	4.79	4.75	14.04	14.09	4.81	4.68	12.39	12.4	2.44	2.51	13.05	13.12	2.61	2.64
11.19	11.22	2.68	2.73	9.69	9.8	2.63	2.55	11.13	11.13	2.46	2.45	11.63	11.58	2.9	2.87	13.04	13.02	1.78	1.75	13.05	13.1	1.03	1	13.48	13.51	4.75	4.75	14.09	13.89	4.68	5.44	12.4	12.36	2.51	2.42	13.12	13.15	2.64	2.63
11.22	11.25	2.73	2.67	9.8	9.71	2.55	2.53	11.13	11.17	2.45	2.5	11.58	11.61	2.87	2.95	13.02	13.04	1.75	1.73	13.1	13.09	1	1.01	13.51	13.48	4.75	4.82	13.89	14.13	5.44	5.19	12.36	12.23	2.42	2.42	13.15	13.07	2.63	2.64
11.25	11.22	2.67	2.7	9.71	9.86	2.53	2.66	11.17	11.12	2.5	2.54	11.61	11.74	2.95	2.86	13.04	12.88	1.73	1.75	13.09	13.01	1.01	1.07	13.48	13.36	4.82	4.81	14.13	14.01	5.19	5.45	12.23	12.2	2.42	2.5	13.07	12.95	2.64	2.63
11.22	11.22	2.7	2.68	9.86	9.63	2.66	2.52	11.12	11.13	2.54	2.45	11.74	11.79	2.86	2.81	12.88	12.84	1.75	1.78	13.01	13.07	1.07	0.98	13.36	13.34	4.81	4.77	14.01	14.08	5.45	5.27	12.2	12.23	2.5	2.48	12.95	12.84	2.63	2.73
11.22	11.2	2.68	2.65	9.63	9.83	2.52	2.7	11.13	11.05	2.45	2.41	11.79	11.72	2.81	2.87	12.84	12.93	1.78	1.8	13.07	13.12	0.98	1.04	13.34	13.38	4.77	4.73	14.08	13.96	5.27	4.87	12.23	12.31	2.48	2.4	12.84	12.92	2.73	2.72
11.2	11.23	2.65	2.72	9.83	9.71	2.7	2.64	11.05	10.93	2.41	2.47	11.72	11.77	2.87	3.07	12.93	12.95	1.8	1.8	13.12	13.16	1.04	1.01	13.38	13.48	4.73	4.82	13.96	14	4.87	5.44	12.31	12.55	2.4	2.47	12.92	13.11	2.72	2.73
11.23	11.15	2.72	2.66	9.71	9.65	2.64	2.51	10.93	11.01	2.47	2.49	11.77	11.42	3.07	1.02	12.95	12.99	1.8	1.81	13.16	13.16	1.01	0.97	13.48	13.49	4.82	4.75	14	13.83	5.44	5.25	12.55	12.05	2.47	2.49	13.11	12.89	2.73	2.7
11.15	11.06	2.66	2.71	9.65	9.89	2.51	2.6	11.01	11.08	2.49	2.51	11.42	11.76	1.02	2.84	12.99	13.03	1.81	1.73	13.16	13.09	0.97	1.05	13.49	13.51	4.75	4.78	13.83	14.07	5.25	4.67	12.05	12.12	2.49	2.51	12.89	13.01	2.7	2.72
11.06	11.11	2.71	2.63	9.89	9.87	2.6	2.57	11.08	11.1	2.51	2.44	11.72	11.72	2.04	2.54	13.03	13.03	1.73	1.74	13.09	12.96	1.05	1.04	13.51	13.52	4.78	4.81	14.07	14.02	4.67	4.9	12.12	12.21	2.51	2.5	13.01	12.9	2.72	2.78
11.11	11.1	2.63	2.68	9.87	9.84	2.57	2.64	11.1	11.14	2.44	2.44	11.72	11.84	2.54	2.62	13.03	13.08	1.74	1.75	12.96	13	1.04	0.99	13.52	13.51	4.81	4.82	14.02	14	4.9	5.41	12.21	12.23	2.5	2.41	12.9	12.91	2.78	2.74
11.1	11.14	2.68	2.63	9.84	9.76	2.64	2.48	11.14	11.11	2.44	2.48	11.84	11.82	2.62	2.61	13.08	13.05	1.75	1.8	13	12.97	0.99	1.06	13.51	13.5	4.82	4.74	14	14.03	5.41	5.24	12.23	12.23	2.41	2.41	12.91	12.82	2.74	2.75
11.14	11.14	2.63	2.65	9.76	9.85	2.48	2.55	11.11	11.15	2.48	2.52	11.82	11.9	2.61	2.63	13.05	13.01	1.8	1.81	12.97	13.04	1.06	1	13.5	13.45	4.74	4.75	14.03	14.03	5.24	5.19	12.23	12.32	2.41	2.45	12.82	12.81	2.75	2.74
11.14	11.19	2.65	2.67	9.85	10.06	2.55	2.66	11.15	11.13	2.52	2.52	11.9	11.62	2.63	2.62	13.01	12.94	1.81	1.79	13.04	13.07	1	0.99	13.45	13.43	4.75	4.8	14.03	14.01	5.19	5.44	12.32	12.32	2.45	2.42	12.81	12.84	2.74	2.78
11.19	11.18	2.67	2.67	10.06	10.16	2.66	3.34	11.13	11.14	2.52	2.44	11.62	11.75	2.62	0.44	12.94	12.86	1.79	1.78	13.07	13	0.99	1.01	13.43	13.39	4.8	4.76	14.01	14.1	5.44	5.31	12.32	12.31	2.42	2.39	12.84	12.77	2.78	2.73
11.18	11.23	2.67	2.71	10.16	9.93	3.34	2.74	11.14	11.08	2.44	2.46	11.75	11.77	0.44	2.65	12.86	12.85	1.78	1.75	13	13.07	1.01	0.98	13.39	13.37	4.76	4.78	14.1	14.27	5.31	4.97	12.31	12.25	2.39	2.38	12.77	12.86	2.73	2.73
11.23	11.2	2.71	2.64	9.93	9.62	2.74	2.62	11.08	11.06	2.46	2.49	11.77	11.81	2.65	2.67	12.85	12.94	1.75	1.76	13.17	13.15	0.96	0.91	13.37	13.4	4.78	4.77	14.27	13.99	4.97	5.44	12.25	12.17	2.38	2.45	12.86	12.97	2.73	2.77
11.2	11.16	2.64	2.65	9.62	9.82	2.62	2.64	11.06	11.02	2.49	2.52	11.81	11.72	2.67	2.66	12.94	13.01	1.76	1.78	13.15	13.29	0.91	0.99	13.34	13.32	4.67	4.65	13.99	13.96	5.44	5.22	12.17	12.14	2.45	2.48	12.97	12.67	2.77	2.74
11.16	11.18	2.65	2.7	9.82	9.71	2.64	2.55	11.02	10.99	2.52	2.44	11.72	11.65	2.66	2.13	12.74	12.79	1.67	1.68	13.29	13.12	0.99	0.91	13.32	13.3	4.65	4.59	14.15	14.13	5.16	5	12.14	12.2	2.48	2.39	12.67	12.79	2.74	2.7
11.18	11.12	2.7	2.66	11.61	11.3	3.01	2.87	11.05	10.95	2.33	2.34	11.65	11.72	2.13	2.61	12.79	12.7	1.68	1.67	13.12	13.2	0.91	1.02	13.3	13.17	4.59	4.59	14.13	13.86	5	5.41	12.35	12.39	2.4	2.42	12.79	12.62	2.7	2.77
11.05	11.06	2.64	2.59	11.3	11.25	2.87	2.87	10.95	11	2.34	2.38	11.72	11.8	2.61	2.52	12.7	12.75	1.67	1.67	13.2	13.17	1.02	0.91	13.17	13.23	4.59	4.65	13.86	13.95	5.41	5.23	12.39	12.36	2.42	2.32	12.67	12.25	2.48	2.53
11.06	11.05	2.59	2.61	11.25	11.2	2.87	2.84	11	10.95	2.38	2.42	11.8	11.69	2.52	2.63	12.75	12.84	1.67	1.68	13.17	13.4	0.91	0.92	13.23	13.31	4.65	4.61	13.95	13.86	5.23	5.09	12.36	12.24	2.32	2.34	12.25	12.51	2.53	2.45
11.05	11.06	2.61	2.63	11.2	11.41	2.84	2.74	10.95	10.94	2.42	2.36	11.69	11.56	2.63	0.73	12.84	12.89	1.68	1.66	13.4	13.4	0.92	0.95	13.31	13.32	4.61	4.61	13.86	13.96	5.09	5.45	12.24	12.23	2.34	2.35	12.51	12.55	2.45	2.53
11.06	11.04	2.63	2.61	11.41	11.48	2.74	2.87	10.94	10.92	2.36	2.33	11.56	11.74	0.73	2.6	12.89	12.89	1.66	1.66	13.4	13.32	0.95	0.91	13.32	13.37	4.61	4.63	13.96	13.92	5.45	5.31	12.23	12.14	2.35	2.37	12.55	13.02	2.53	2.56
11.04	10.98	2.61	2.66	11.48	11.47	2.87	2.78	10.92	10.86	2.33	2.33	11.74	11.78	2.6	0.6	12.89	12.92	1.66	1.67	13.32	13.23	0.91	1.02	13.37	13.33	4.63	4.66	13.92	13.91	5.31	5.16	12.14	12.16	2.37	2.31	13.02	13	2.56	2.55
10.98	10.97	2.66	2.57	11.47	11.42	2.78	2.86	10.86	10.86	2.33	2.37	11.78	11.66	0.6	2.73	12.92	12.91	1.67	1.65	13.23	13.15	1.02	0.93	13.33	13.39	4.66	4.6	13.91	13.91	5.16	5.29	12.16	12.22	2.31	2.34	13	12.89	2.55	2.55
10.97	10.95	2.57	2.62	11.42	11.41	2.86	2.91	10.86	10.9	2.37	2.37	11.66	11.68	2.73	2.6	12.91	12.9	1.65	1.64	13.15	13.12	0.93	0.89	13.39	13.3	4.6	4.58	13.91	13.92	5.29	5.33	12.22	12.3	2.34	2.38	12.89	12.92	2.55	2.55
10.95	11.01	2.62	2.6	11.41	11.42	2.91	2.82	10.9	10.9	2.37	2.39	11.68	11.72	2.6	2.59	12.9	12.81	1.64	1.66	13.12	13.38	0.89	0.9	13.3	13.35	4.58	4.65	13.92	14	5.33	5.11	12.3	12.29	2.38	2.31	12.92	12.77	2.55	2.57
11.01	11.03	2.6	2.6	11.42	11.38	2.82	2.78	10.9	10.96	2.39	2.32	11.72	5.31	2.59	0.34	12.81	12.69	1.66	1.67	13.38	13.26	0.9	0.89	13.35	13.25	4.65	4.62	14	6.81	5.11	4.8	12.29	12.31	2.31	2.32	12.77	12.85	2.57	2.48
11.03	11.05	2.6	2.66	11.38	11.38	2.78	2.84	10.96	10.98	2.32	2.33	5.31	11.15	0.34	1.25	12.69	12.73	1.67	1.66	13.26	13.3	0.89	0.96	13.25	13.21	4.62	4.59	6.81	13.95	4.8	3.67	12.31	12.32	2.32	2.36	12.85	12.78	2.48	2.44
11.05	11.09	2.66	2.56	11.38	11.41	2.84	2.78	10.98	11.02	2.33	2.32	11.15	10.19	1.25	2.66	12.73	12.83	1.66	1.68	13.3	13.19	0.96	0.87	13.21	13.25	4.59	4.59	13.95	14.1	3.67	4.52	12.32	12.3	2.36	2.32	12.78	12.79	2.44	2.52
11.09	11.07	2.56	2.61	11.41	11.25	2.78	3.13	11.02	10.95	2.32	2.36	10.19	10.37	2.66	2.61	12.83	12.85	1.68	1.66	13.19	13.27	0.87	0.99	13.25	13.25	4.59	4.65	14.1	14.13	4.52	5.49	12.3	12.31	2.32	2.31	12.79	12.78	2.52	2.46
11.07	11.09	2.61	2.66	11.25	11.4	3.13	2.79	10.95	10.96	2.36	2.37	10.37	11.71	2.61	1.9	12.85	12.91	1.66	1.68	13.27	11.67	0.99	0.77	13.25	13.33	4.65	4.65	14.13	13.96	5.49	5.32	12.31	12.25	2.31	2.36	12.78	13.01	2.46	2.46
11.09	11.07	2.66	2.61	11.4	11.36	2.79	2.89	10.96	10.93	2.37	2.38	11.71	10.56	1.9	2.61	12.91	12.93	1.68	1.69	11.67	12.94	0.77	0.98	13.33	13.39	4.65	4.6	13.96	13.98	5.32	4.73	12.25	12.18	2.36	2.37	13.01	12.86	2.46	2.47
11.07	11.04	2.61	2.65	11.36	11.25	2.89	2.91	10.93	10.96	2.38	2.31	10.56	11.54	2.61	2.51	12.93	12.91	1.69	1.68	12.94	13.12	0.98	0.95	13.39	13.33	4.6	4.6	13.98	13.86	4.73	5.42	12.18	12.17	2.37	2.32	12.86	12.86	2.47	2.46
11.04	11.06	2.65	2.54	11.25	11.5	2.91	2.8	10.96	10.85	2.31	2.29	11.54	11.6	2.51	2.65	12.91	12.91	1.68	1.66	13.12	13.26	0.95	0.86	13.33	13.38	4.6	4.62	13.86	13.89	5.42	5.29	12.17	12.17	2.32	2.31	12.86	12.8	2.46	2.46
11.06	10.96	2.54	2.62	11.5	11.47	2.8	3.17	10.85	10.83	2.29	2.31	11.6	11.63	2.65	2.6	12.91	12.8	1.66	1.64	13.26	13.26	0.86	0.94	13.38	13.35	4.62	4.61	13.89	13.99	5.29	5.44	12.17	12.25	2.31	2.38	12.8	12.84	2.46	2.51
10.96	10.97	2.62	2.65	11.47	11.35	3.17	2.83	10.83	10.92	2.31	2.37	11.63	11.76	2.6	2.57	12.8	12.69	1.64	1.64	13.26	13.05	0.94	0.92	13.35	13.29	4.61	4.58	13.99	14.13	5.44	5.31	12.25	12.29	2.38	2.31	12.84	12.92	2.51	2.54
10.97	10.98	2.65	2.57	11.35	11.35	2.83	2.88	10.92	10.9	2.37	2.37	11.76	11.69	2.57	1.79	12.69	12.7	1.64	1.68	13.05	13.08	0.92	0.96	13.29	13.33	4.58	4.64	14.13	14.19	5.31	5.39	12.29	12.3	2.31	2.31	12.92	12.73	2.54	2.61
10.98	11	2.57	2.65	11.35	11.32	2.88	2.76	10.9	10.92	2.37	2.34	11.69	11.61	1.79	2.57	12.7	12.78	1.68	1.67	13.08	13.06	0.96	0.9	13.33	13.27	4.64	4.65	14.19	14.06	5.39	5.25	12.3	12.34	2.31	2.35	12.73	12.85	2.61	2.58
11	11.04	2.65	2.56	11.32	11.25	2.76	3.24	10.92	10.99	2.34	2.3	11.61	10.18	2.57	2.53	12.78	12.86	1.67	1.64	13.06	13.03	0.9	1.08	13.27	13.19	4.65	4.58	14.06	14.01	5.25	5.31	12.34	12.33	2.35	2.39	12.85	12.88	2.58	2.53
11.04	11.04	2.56	2.65	11.25	11.39	3.24	2.77	10.99	10.94	2.3	2.31	10.18	11.69	2.53	2.46	12.86	12.89	1.64	1.65	13.03	13.16	1.08	1.01	13.19	13.26	4.58	4.61	14.01	13.98	5.31	5.32	12.33	12.32	2.39	2.29	12.88	12.98	2.53	2.57
11.04	11.04	2.65	2.59	11.39	11.09	2.77	2.87	10.94	10.94	2.31	2.31	11.69	10.11	2.46	0.75	12.89	12.89	1.65	1.61	13.16	13.14	1.01	0.87	13.26	13.3	4.61	4.66	13.98	13.78	5.32	5.12	12.32	12.34	2.29	2.32	12.98	12.9	2.57	2.45
11.04	11.05	2.59	2.59	11.09	11.24	2.87	2.79	10.94	10.97	2.31	2.35	10.11	10.7	0.75	2.47	12.89	12.9	1.61	1.62	13.14	12.98	0.87	0.97	13.3	13.38	4.66	4.59	13.78	13.91	5.12	5.37	12.34	12.27	2.32	2.36	12.9	12.92	2.45	2.43
11.05	11.08	2.59	2.63	11.24	11.26	2.79	2.84	10.97	10.95	2.35	2.39	11.83	11.71	1.83	2.58	12.9	12.84	1.62	1.61	12.98	13.19	0.97	0.9	13.38	13.35	4.59	4.6	13.91	13.96	5.37	5.45	12.27	12.23	2.36	2.3	12.92	12.75	2.43	2.48
11.08	11.08	2.63	2.58	11.26	11.03	2.84	2.78	10.95	10.96	2.39	2.29	11.71	11.66	2.58	2.61	12.84	12.83	1.61	1.61	13.19	13.04	0.9	0.99	13.35	13.34	4.6	4.62	13.96	14.03	5.45	5.39	12.23	12.19	2.3	2.31	12.75	12.76	2.48	2.51
11.08	11.06	2.58	2.64	11.03	11.11	2.78	2.96	10.96	10.94	2.29	2.3	11.66	11.69	2.61	2.55	12.83	12.74	1.61	1.61	13.04	13	0.99	0.97	13.34	13.37	4.62	4.68	14.03	13.79	5.39	5.5	12.19	12.18	2.31	2.36	12.76	12.71	2.51	2.44
11.06	11.08	2.64	2.54	11.11	11.03	2.96	2.74	10.94	10.81	2.3	2.31	11.69	11.73	2.55	2.65	12.74	12.72	1.61	1.6	13	12.93	0.97	0.89	13.37	13.35	4.68	4.63	13.79	13.98	5.5	5.47	12.18	12.21	2.36	2.36	12.71	12.69	2.44	2.54
11.08	10.97	2.54	2.61	11.03	11.22	2.74	2.87	10.81	10.84	2.31	2.35	11.73	11.85	2.65	2.56	12.72	12.76	1.6	1.64	12.93	13.19	0.89	0.97	13.35	13.34	4.63	4.6	13.98	14	5.47	5.4	12.21	12.27	2.36	2.27	12.69	12.71	2.54	2.45
10.97	10.97	2.61	2.57	11.22	11.44	2.87	2.78	10.84	10.89	2.35	2.38	11.85	11.7	2.56	0.63	12.76	12.86	1.64	1.62	13.19	13.34	0.97	0.9	13.34	13.27	4.6	4.6	14	13.94	5.4	5.38	12.27	12.27	2.27	2.32	12.71	13	2.45	2.44
10.97	10.93	2.57	2.57	11.44	11.16	2.78	2.96	10.89	10.91	2.38	2.33	11.7	11.68	0.63	2.63	12.86	12.85	1.62	1.61	13.34	13.25	0.9	1.01	13.27	13.2	4.6	4.62	13.94	14	5.38	5.3	12.27	12.33	2.32	2.36	13	12.81	2.44	2.43
10.93	10.96	2.57	2.65	11.16	11.21	2.96	2.76	10.91	10.94	2.33	2.29	11.68	11.79	2.63	2.58	12.85	12.9	1.61	1.63	13.25	13.18	1.01	0.92	13.2	13.22	4.62	4.64	14	14.28	5.3	5.51	12.33	12.36	2.36	2.3	12.81	12.78	2.43	2.44
10.96	11.02	2.65	2.55	11.21	11.31	2.76	2.85	10.94	10.95	2.29	2.3	11.79	11.86	2.58	2.6	12.9	12.9	1.63	1.62	13.18	13.16	0.92	0.88	13.22	13.3	4.64	4.6	14.28	14.15	5.51	5.22	12.36	12.27	2.3	2.28	12.78	12.73	2.44	2.45
11.02	11.09	2.55	2.62	11.31	11.31	2.85	2.84	10.95	10.92	2.3	2.33	11.86	11.86	2.6	0.94	12.9	12.86	1.62	1.62	13.16	13.03	0.88	0.94	13.3	13.32	4.6	4.59	14.15	13.97	5.22	5.36	12.27	12.32	2.28	2.34	12.73	12.73	2.45	2.59
11.09	11.06	2.62	2.57	11.31	11.38	2.84	2.89	10.92	10.93	2.33	2.37	11.86	11.72	0.94	2.57	12.86	12.82	1.62	1.63	12.71	12.77	0.83	0.76	13.32	13.31	4.59	4.64	13.97	14.05	5.36	5.37	12.32	12.29	2.34	2.34	12.73	12.67	2.59	2.56
11.06	11.09	2.57	2.64	11.38	11.23	2.89	2.78	10.93	10.92	2.37	2.4	11.72	11.75	2.57	2.53	12.82	12.73	1.63	1.6	12.77	11.51	0.76	0.86	13.34	13.22	4.56	4.49	14.05	14.05	5.37	5.29	12.29	12.2	2.34	2.3	12.67	12.7	2.56	2.57
11.09	11.1	2.64	2.57	11.23	11	2.78	2.84	10.85	10.9	2.23	2.24	11.75	11.68	2.53	2.55	12.94	12.93	1.6	1.66	11.51	12.86	0.86	0.77	13.22	13.13	4.49	4.51	14.03	13.95	4.57	4.6	12.2	12.17	2.3	2.34	12.7	12.67	2.57	2.6
10.97	11.09	2.48	2.54	12.08	12.18	3.08	2.78	10.9	10.84	2.24	2.28	11.68	11.71	2.55	0.72	12.93	12.98	1.66	1.68	12.86	12.92	0.77	0.79	13.13	13.13	4.51	4.55	13.95	14	4.6	4.69	12.13	12.02	2.17	2.2	12.67	12.84	2.6	2.5
11.09	10.99	2.54	2.49	12.18	12.11	2.78	2.51	10.84	10.88	2.28	2.22	11.71	11.83	0.72	2.64	12.98	13.01	1.68	1.69	12.92	12.79	0.79	0.83	13.13	13.2	4.55	4.5	14	13.9	4.69	4.61	12.02	12.03	2.2	2.16	12.89	13	3.04	2.91
10.99	11.02	2.49	2.44	12.11	12.13	2.51	2.63	10.88	10.83	2.22	2.2	11.83	11.6	2.64	2.61	13.01	12.93	1.69	1.6	12.79	12.88	0.83	0.74	13.2	13.26	4.5	4.48	13.9	13.82	4.61	4.89	12.03	12.09	2.16	2.22	13	12.96	2.91	2.96
11.02	11.11	2.44	2.7	12.13	11.99	2.63	2.58	10.83	10.8	2.2	2.26	11.6	11.66	2.61	2.53	12.93	12.87	1.6	1.54	12.88	12.86	0.74	0.82	13.26	13.28	4.48	4.51	13.82	13.94	4.89	4.38	12.09	12.18	2.22	2.17	12.96	12.91	2.96	3.13
11.11	11.01	2.7	2.51	11.99	12.19	2.58	2.5	10.8	10.78	2.26	2.26	11.66	11.69	2.53	2.58	12.87	12.81	1.54	1.66	12.86	12.95	0.82	0.79	13.28	13.3	4.51	4.54	13.94	14.16	4.38	3.55	12.18	12.16	2.17	2.2	12.91	12.99	3.13	3.07
11.01	10.96	2.51	2.59	12.19	12.1	2.5	2.61	10.78	10.73	2.26	2.27	11.69	11.77	2.58	2.51	12.81	12.71	1.66	1.67	12.95	12.75	0.79	0.77	13.3	13.34	4.54	4.54	14.16	13.98	3.55	4.61	12.16	12.18	2.2	2.18	12.99	13.13	3.07	2.96
10.96	10.98	2.59	2.52	12.1	11.99	2.61	2.61	10.73	10.7	2.27	2.2	11.77	11.79	2.51	1.62	12.71	12.81	1.67	1.68	12.75	12.1	0.77	0.79	13.34	13.27	4.54	4.54	13.98	14	4.61	4.68	12.18	12.23	2.18	2.19	13.13	13.01	2.96	3.06
10.98	11.01	2.52	2.58	11.99	12.09	2.61	2.57	10.7	10.76	2.2	2.19	11.79	11.49	1.62	2.5	12.81	12.85	1.68	1.69	12.1	12.88	0.79	0.72	13.27	13.24	4.54	4.49	14	14.02	4.68	4.67	12.23	12.19	2.19	2.18	13.01	13.07	3.06	3.11
11.01	11.05	2.58	2.49	12.09	12.17	2.57	2.51	10.76	10.82	2.19	2.25	11.49	11.82	2.5	1.82	12.85	12.93	1.69	1.65	12.88	12.13	0.72	0.86	13.24	13.19	4.49	4.49	14.02	14	4.67	4.6	12.19	12.16	2.18	2.17	13.07	12.83	3.11	3.07
11.05	11.03	2.49	2.52	12.17	12.14	2.51	2.56	10.82	10.86	2.25	2.28	11.82	11.83	1.82	2.49	12.93	12.99	1.65	1.7	12.13	12.62	0.86	0.77	13.19	13.12	4.49	4.48	14	13.9	4.6	4.06	12.16	12.14	2.17	2.15	12.83	12.97	3.07	2.9
11.03	11	2.52	2.43	12.14	12.18	2.56	2.6	10.86	10.86	2.28	2.23	11.83	11.83	2.49	2.64	12.99	12.99	1.7	1.68	12.62	13.02	0.77	0.79	13.12	13.17	4.48	4.49	13.9	13.89	4.06	4.71	12.14	12.02	2.15	2.2	12.97	12.88	2.9	2.92
11	11.04	2.43	2.52	12.18	12.05	2.6	2.58	10.86	10.88	2.23	2.2	11.83	11.82	2.64	2.59	12.99	12.97	1.68	1.64	13.02	13.07	0.79	0.79	13.17	13.25	4.49	4.53	13.89	14.18	4.71	5.03	12.02	12.05	2.2	2.16	12.88	12.92	2.92	3
11.04	11.05	2.52	2.46	12.05	12.16	2.58	2.71	10.88	10.9	2.2	2.23	11.82	11.78	2.59	0.88	12.97	12.93	1.64	1.56	13.07	12.97	0.79	0.73	13.25	13.24	4.53	4.56	14.18	13.94	5.03	4.16	12.05	12.04	2.16	2.2	12.92	12.83	3	3.09
11.05	11.02	2.46	2.51	12.16	12.08	2.71	2.55	10.9	10.88	2.23	2.25	11.78	11.84	0.88	2.59	12.93	12.82	1.56	1.62	12.97	12.98	0.73	0.85	13.24	13.29	4.56	4.49	13.94	13.93	4.16	3.65	12.04	12.11	2.2	2.23	12.83	12.92	3.09	3
11.02	11.01	2.51	2.47	12.08	12.2	2.55	2.52	10.88	10.86	2.25	2.25	11.84	11.89	2.59	2.58	12.82	12.7	1.62	1.66	12.98	12.91	0.85	0.79	13.29	13.33	4.49	4.47	13.93	13.86	3.65	4.78	12.11	12.13	2.23	2.19	12.92	13.13	3	3.1
11.01	11.04	2.47	2.53	12.2	12.35	2.52	2.8	10.86	10.9	2.25	2.2	11.89	11.83	2.58	2.55	12.7	12.8	1.66	1.67	12.91	12.94	0.79	0.8	13.33	13.31	4.47	4.5	13.86	13.75	4.78	4.61	12.13	12.16	2.19	2.17	13.13	12.98	3.1	3
11.04	10.95	2.53	2.46	12.35	12.23	2.8	2.62	10.9	10.83	2.2	2.21	11.83	11.64	2.55	1.55	12.8	12.89	1.67	1.68	12.94	12.71	0.8	0.81	13.31	13.28	4.5	4.56	13.75	13.91	4.61	4.62	12.16	12.26	2.17	2.38	12.98	13.11	3	3.05
10.95	10.9	2.46	2.53	12.23	12.2	2.62	2.7	10.83	10.8	2.21	2.26	11.64	11.73	1.55	2.59	12.89	12.9	1.68	1.69	12.71	12.76	0.81	0.75	13.28	13.28	4.56	4.54	13.91	13.66	4.62	4.78	12.26	12.28	2.38	2.31	13.11	13.01	3.05	3.11
10.9	10.93	2.53	2.43	12.2	12.1	2.7	2.6	10.8	10.77	2.26	2.22	11.73	11.87	2.59	2.47	12.9	12.94	1.69	1.6	12.76	12.67	0.75	0.82	13.28	13.14	4.54	4.53	13.66	13.86	4.78	4.71	12.28	12.23	2.31	2.19	13.01	13.08	3.11	3.06
10.93	10.93	2.43	2.5	12.1	12.05	2.6	2.64	10.77	10.74	2.22	2.2	11.87	11.9	2.47	2.67	12.94	12.97	1.6	1.63	12.67	12.88	0.82	0.79	13.14	13.15	4.53	4.48	13.86	13.76	4.71	4.67	12.23	12.16	2.19	2.19	13.08	12.98	3.06	3.07
10.93	10.96	2.5	2.45	12.05	11.97	2.64	2.57	10.74	10.72	2.2	2.18	11.9	11.83	2.67	1.91	12.97	12.91	1.63	1.65	12.88	12.99	0.79	0.89	13.15	13.17	4.48	4.47	13.76	13.85	4.67	4.44	12.16	12.11	2.19	2.21	12.98	12.76	3.07	2.9
10.96	11.02	2.45	2.51	11.97	12.16	2.57	2.64	10.72	10.8	2.18	2.24	11.83	11.84	1.91	2.52	12.91	12.92	1.65	1.64	12.99	13.01	0.89	0.82	13.17	13.19	4.47	4.48	13.85	13.97	4.44	4.22	12.11	12.01	2.21	2.15	12.76	12.96	2.9	2.91
11.02	11.04	2.51	2.47	12.16	12.25	2.64	2.59	10.8	10.82	2.24	2.27	11.84	11.84	2.52	2.49	12.92	12.9	1.64	1.68	13.01	12.76	0.82	0.76	13.19	13.24	4.48	4.5	13.97	13.89	4.22	4.55	12.01	12.04	2.15	2.2	12.96	12.94	2.91	2.86
11.04	11.02	2.47	2.49	12.25	12.21	2.59	2.81	10.82	10.84	2.27	2.22	11.84	11.77	2.49	2.57	12.9	12.88	1.68	1.69	12.76	12.91	0.76	0.9	13.24	13.31	4.5	4.52	13.89	13.84	4.55	3.8	12.04	12.08	2.2	2.22	12.94	13.13	2.86	2.9
11.02	11.03	2.49	2.42	12.21	12.19	2.81	2.71	10.84	10.85	2.22	2.21	11.77	11.85	2.57	1.38	12.88	12.77	1.69	1.67	12.91	12.96	0.9	0.78	13.31	13.28	4.52	4.53	13.84	13.8	3.8	4.62	12.08	12.13	2.22	2.15	13.13	13.07	2.9	3.07
11.03	10.99	2.42	2.5	12.19	12.14	2.71	2.64	10.85	10.87	2.21	2.2					12.77	12.77	1.67	1.59	12.96	12.82	0.78	0.76	13.28	13.21	4.53	4.44	13.8	13.81	4.62	4.92	12.13	12.14	2.15	2.2	13.07	13.07	3.07	2.93
10.99	11.01	2.5	2.43	12.14	12.33	2.64	2.75	10.87	10.89	2.2	2.27					12.77	12.84	1.59	1.61	12.82	12.75	0.76	0.81	13.21	13.28	4.44	4.44	13.81	14.01	4.92	3.87	12.14	12.15	2.2	2.21	13.07	12.97	2.93	2.88
11.01	10.95	2.43	2.5	12.33	12.13	2.75	2.6									12.84	12.87	1.61	1.61	12.75	12.97	0.81	0.72	13.28	13.18	4.44	4.42	14.01	14.11	3.87	3.76	12.15	12.14	2.21	2.17	12.97	13.03	2.88	3.01
10.95	10.93	2.5	2.48	12.13	12.14	2.6	2.69									12.87	12.94	1.61	1.67	12.97	12.98	0.72	0.84	13.18	13.12	4.42	4.49	14.11	14.02	3.76	4.69	12.14	12.24	2.17	2.21	13.03	12.97	3.01	3.03
10.93	10.89	2.48	2.41	12.14	12.12	2.69	2.69									12.94	12.96	1.67	1.68	12.98	12.74	0.84	0.78	13.12	13.08	4.49	4.5	14.02	13.86	4.69	4.64	12.24	12.18	2.21	2.16	12.97	13.08	3.03	2.95
10.89	10.73	2.41	2.47	12.12	12.1	2.69	2.53									12.96	13	1.68	1.66	12.74	12.81	0.78	0.82	13.08	13.14	4.5	4.48	13.86	14.07	4.64	4.5	12.18	12.15	2.16	2.16	13.08	12.85	2.95	2.9
10.73	10.92	2.47	2.5	12.1	12.2	2.53	2.65									13	12.9	1.66	1.57	12.81	12.68	0.82	0.76	13.14	13.15	4.48	4.45	14.07	13.96	4.5	3.99	12.15	12.17	2.16	2.22	12.85	13.02	2.9	2.92
10.92	10.98	2.5	2.43	12.2	12.12	2.65	2.82									12.9	12.88	1.57	1.64	12.68	12.79	0.76	0.73	13.15	13.22	4.45	4.45	13.96	13.87	3.99	4.22	12.17	12.02	2.22	2.23	13.02	12.89	2.92	2.88
10.98	10.92	2.43	2.57	12.12	12.11	2.82	2.59									12.88	12.78	1.64	1.65	12.79	12.8	0.73	0.78	13.22	13.25	4.45	4.49	13.87	13.82	4.22	3.47	12.02	12.01	2.23	2.17	12.89	13.08	2.88	2.84
10.92	11.01	2.57	2.55	12.11	12.19	2.59	2.61									12.78	12.8	1.65	1.68	12.8	12.79	0.78	0.75	13.25	13.23	4.49	4.48	13.82	14.02	3.47	4.76	12.01	12.08	2.17	2.2	13.08	12.95	2.84	2.97
11.01	10.95	2.55	2.52	12.19	12.16	2.61	2.57									12.8	12.82	1.68	1.62									14.02	13.95	4.76	4.58	12.08	12.13	2.2	2.22	12.95	12.99	2.97	2.93
10.95	11	2.52	2.51	12.16	12.3	2.57	2.66									12.82	12.92	1.62	1.71									13.95	13.81	4.58	4.63	12.13	12.19	2.22	2.15	12.99	12.91	2.93	2.87
																																12.19	12.16	2.15	2.16	12.91	12.88	2.87	2.87
																																				12.88	12.84	2.87	3

## Sheet: VILI Data
					VILI Scoring (1 to 4)
Rabbit	Weight (Kg)	Wet Lung Weight (g)	Dry Lung Weight (g)	Wet:Dry Weight Ratio	Alveolar Congestion	Hemorrhage	Infiltration of Neutrophils in airspaces or vessel walls	Alveolar wall thickiness/hyaline membrane formation	Overall Average
MV1	2.79	0.3764	0.0739	5.09337	1	4	1.66667	1	1.91667
MV2	3.18	0.3788	0.0641	5.90952	3	3	1	1	2
MV3	3.11	0.2305	0.0427	5.39813	1.66667	4	1	1.66667	2.08333
MV4	3.02	0.1442	0.0219	6.58447	1	0.666667	0.333333	0	0.5
MV5	2.98	0.1952	0.0303	6.44224	2	1	2	0.666667	1.41667
SB1	2.65	0.2641	0.0501	5.27146	1	0.333333	0.333333	0	0.416667
SB2	2.65	0.2704	0.0474	5.70464	4	0.666667	0.333333	0	1.25
SB3	2.53	0.1554	0.0301	5.16279	4	0.666667	0.333333	0	1.25
